# Supplementary material for: Identification of Neurensin-2 as a novel modulator of emotional behavior
Source: PubMed Central journal article supplement (PMC8505262; doi:10.1038/s41380-021-01058-5), 2021-03-19
Supplement: 41380_2021_1058_MOESM2_ESM.pdf [file 41380_2021_1058_MOESM2_ESM.pdf]

**Figure S1**

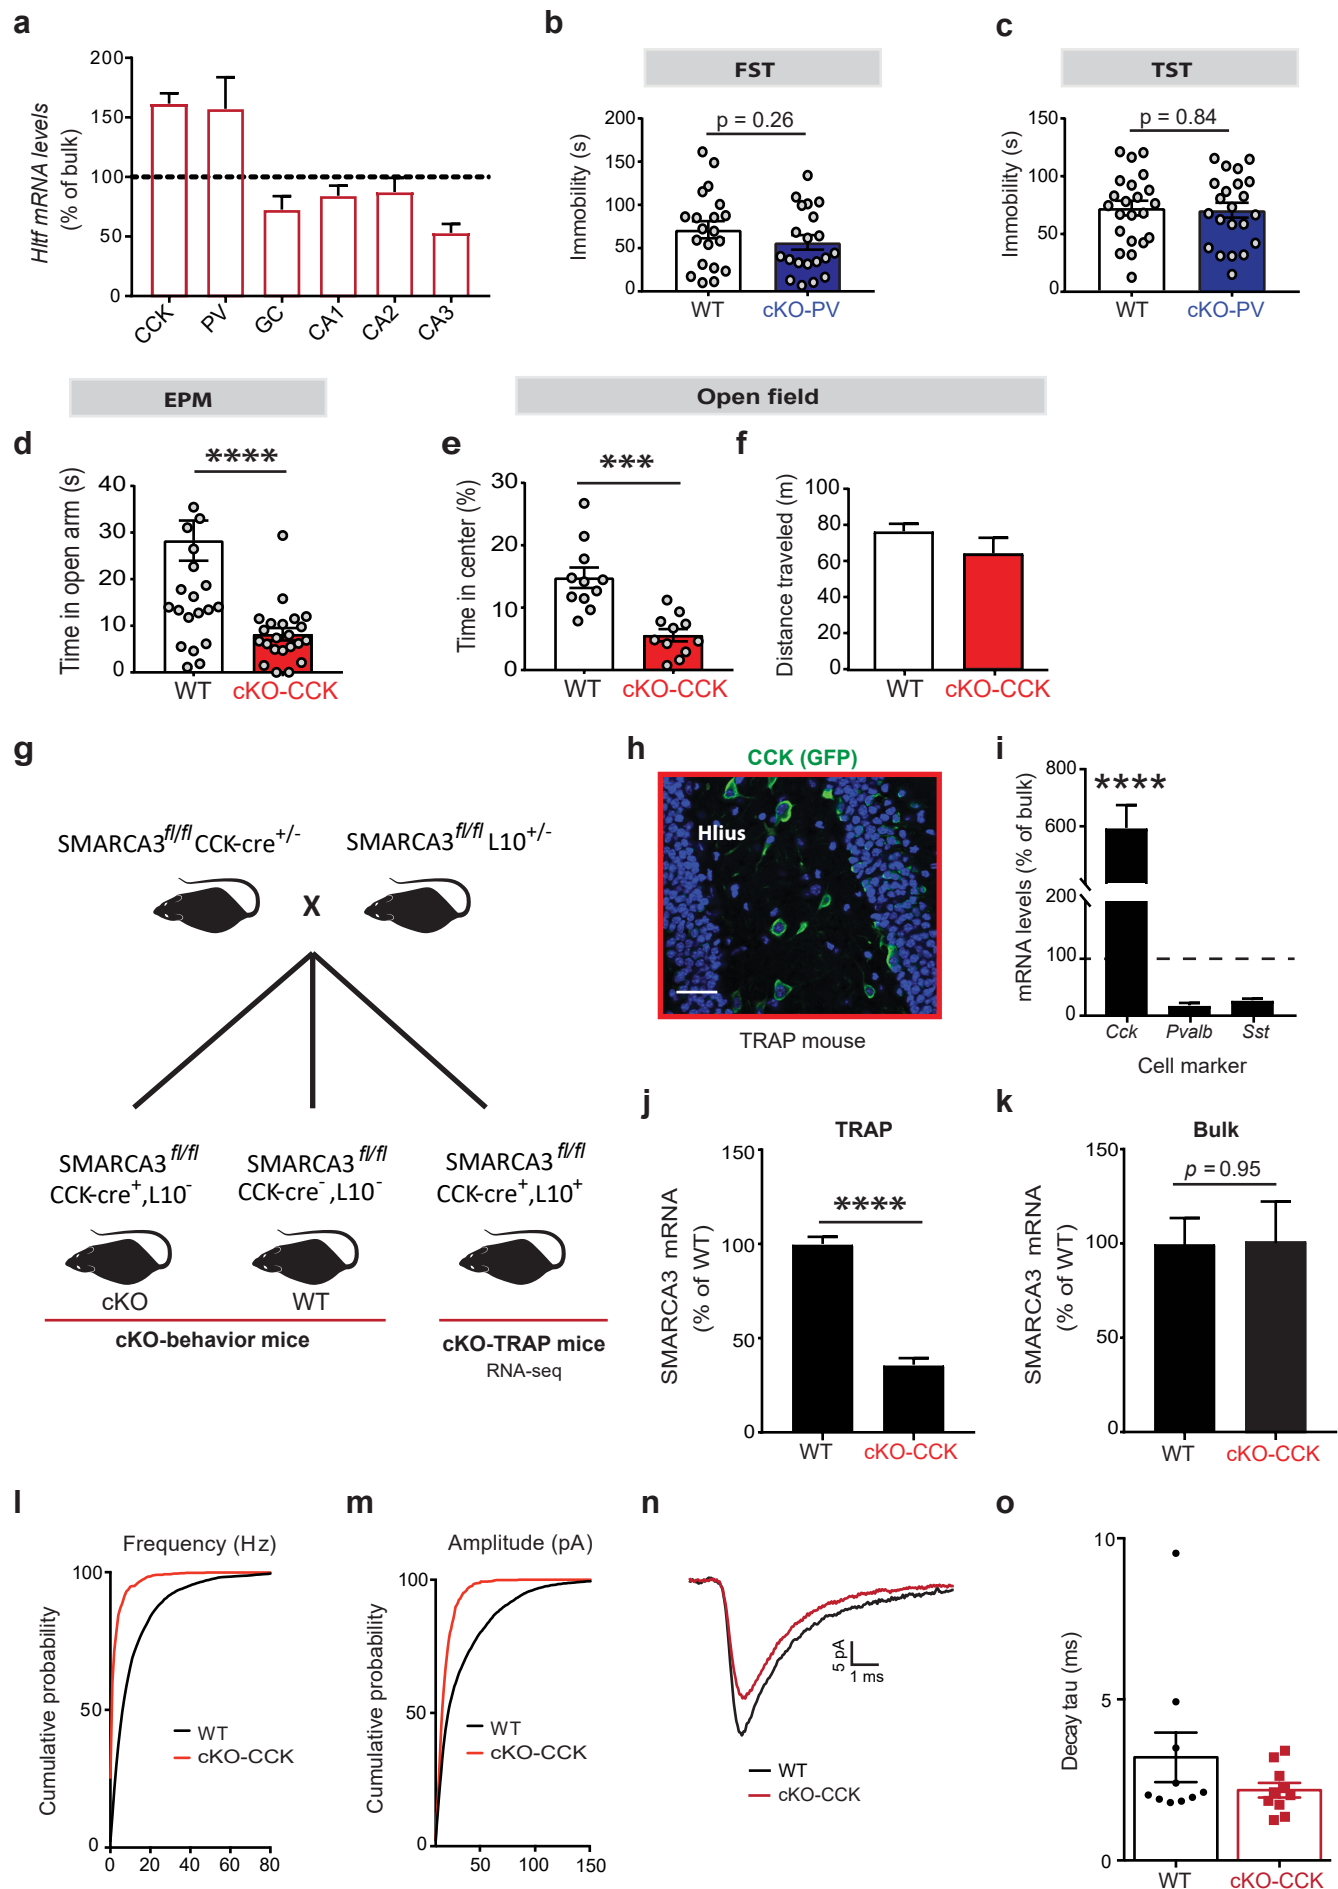

Figure S2

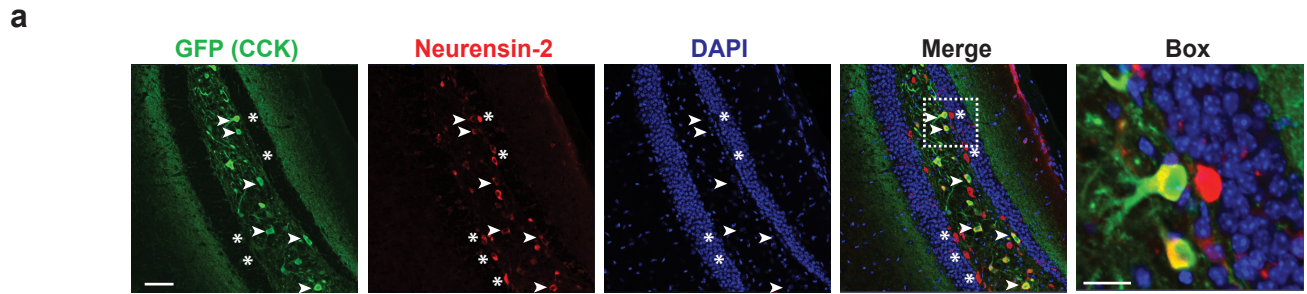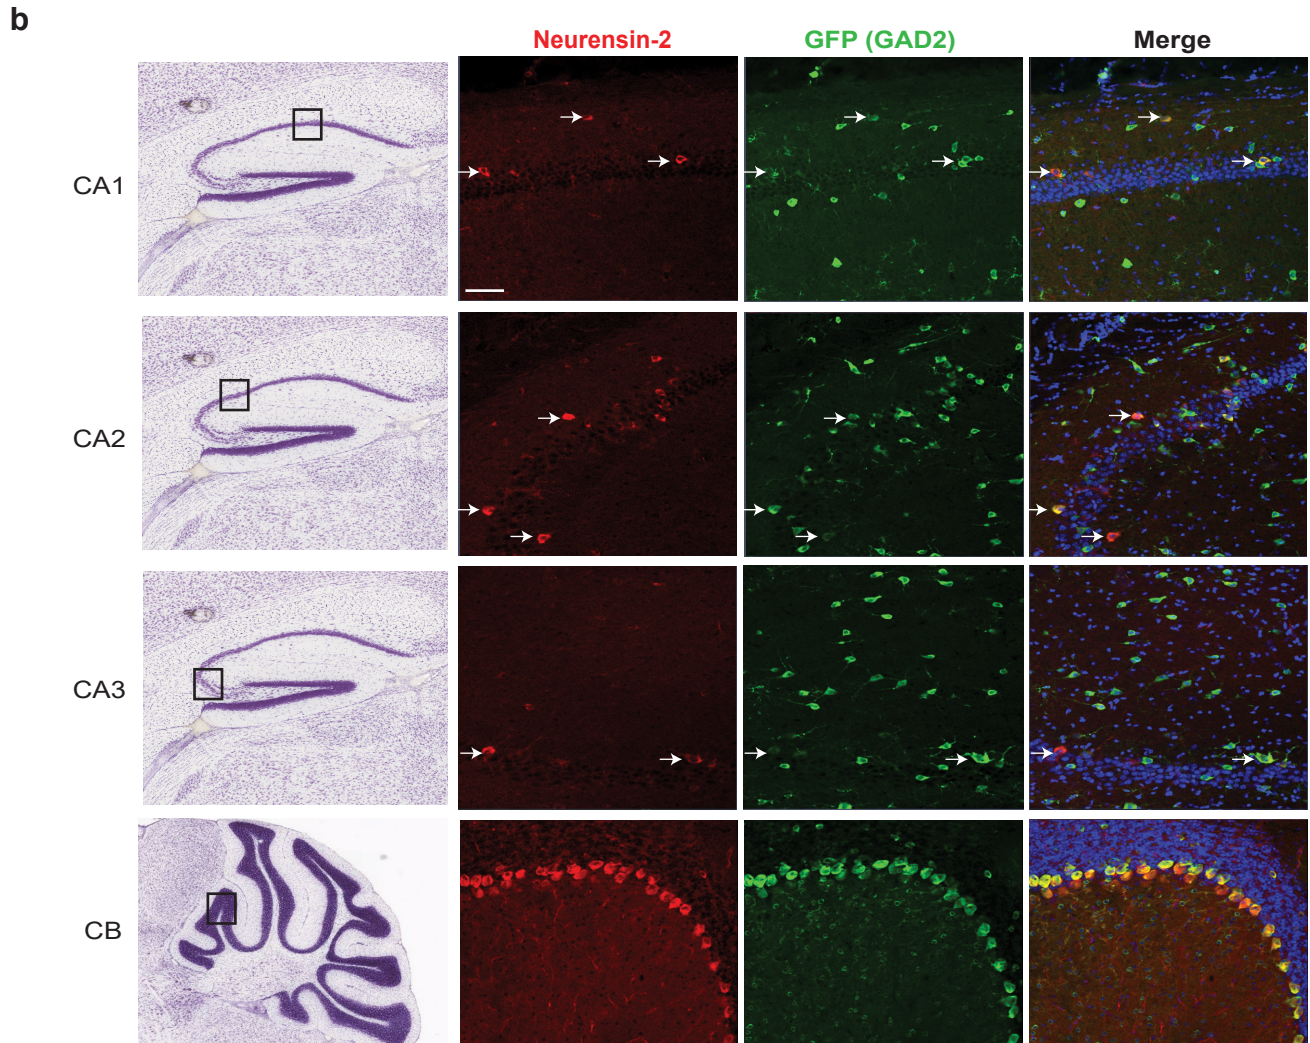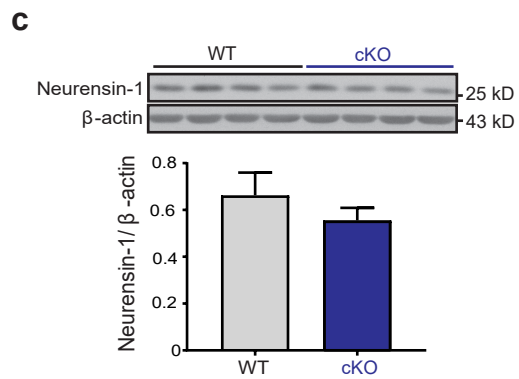



Figure S3

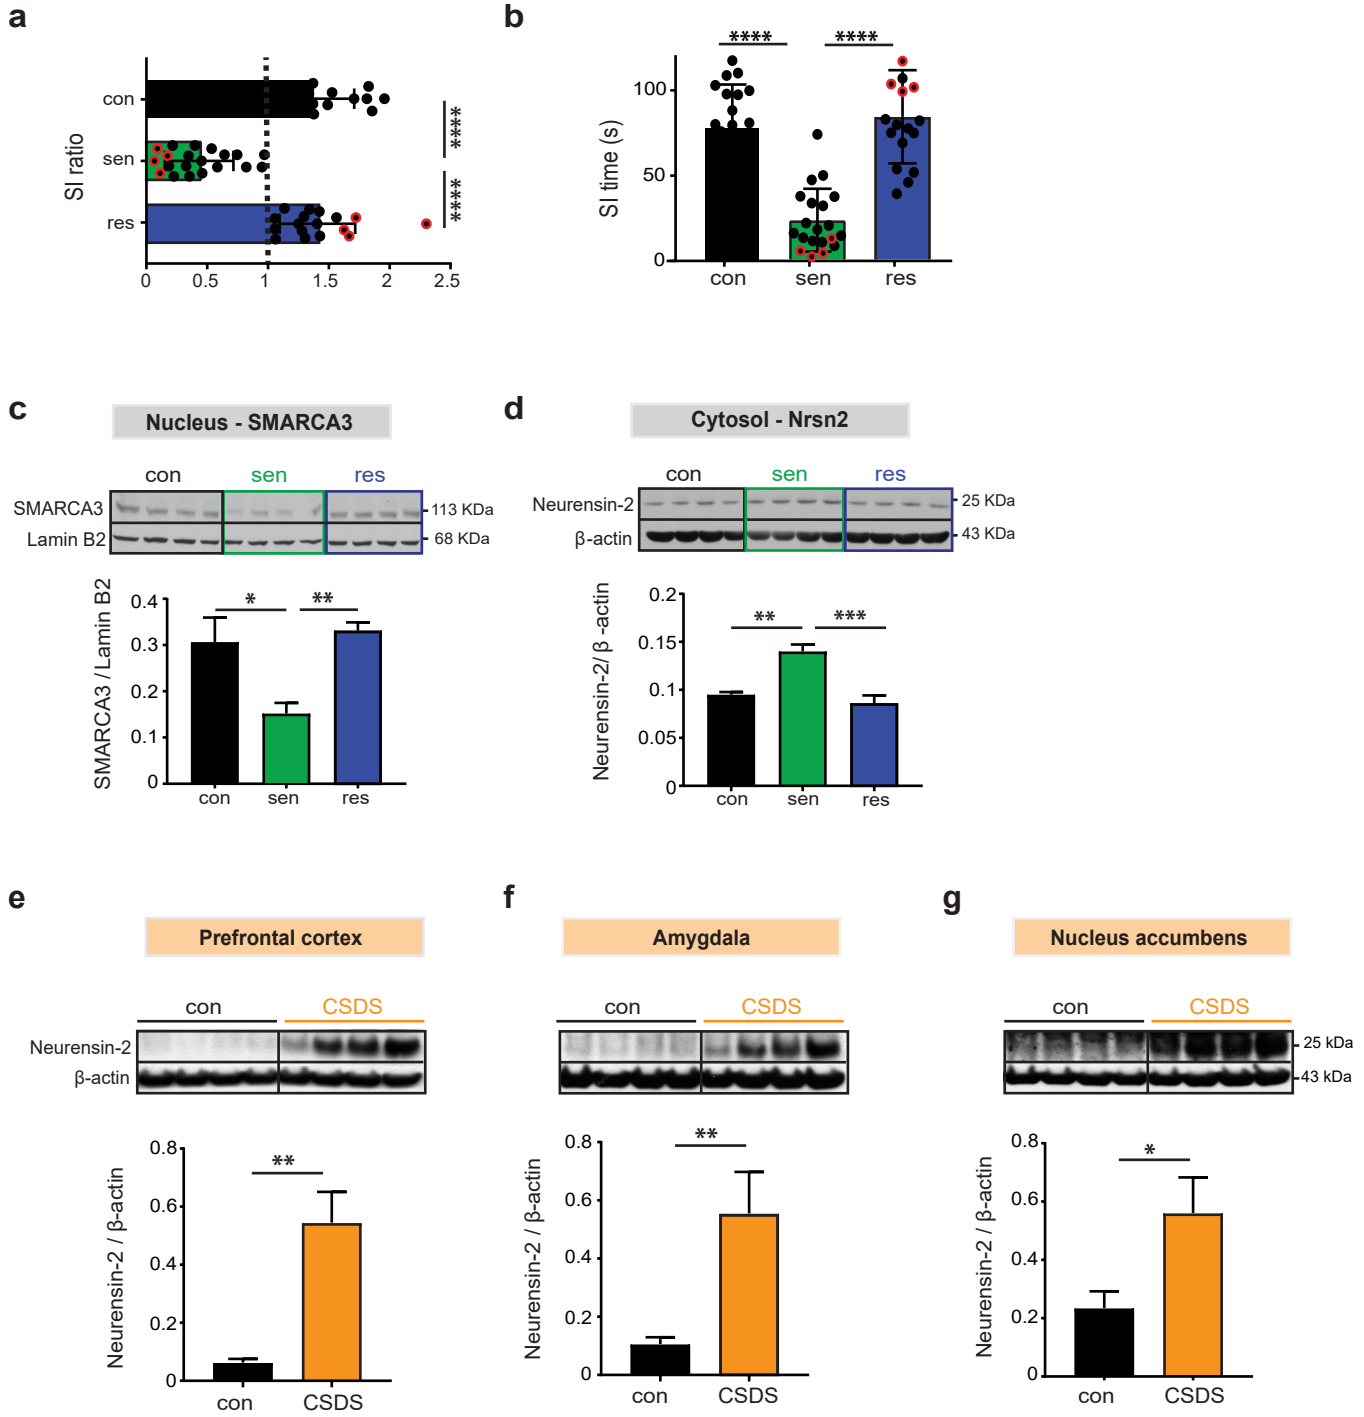

**Figure S4**

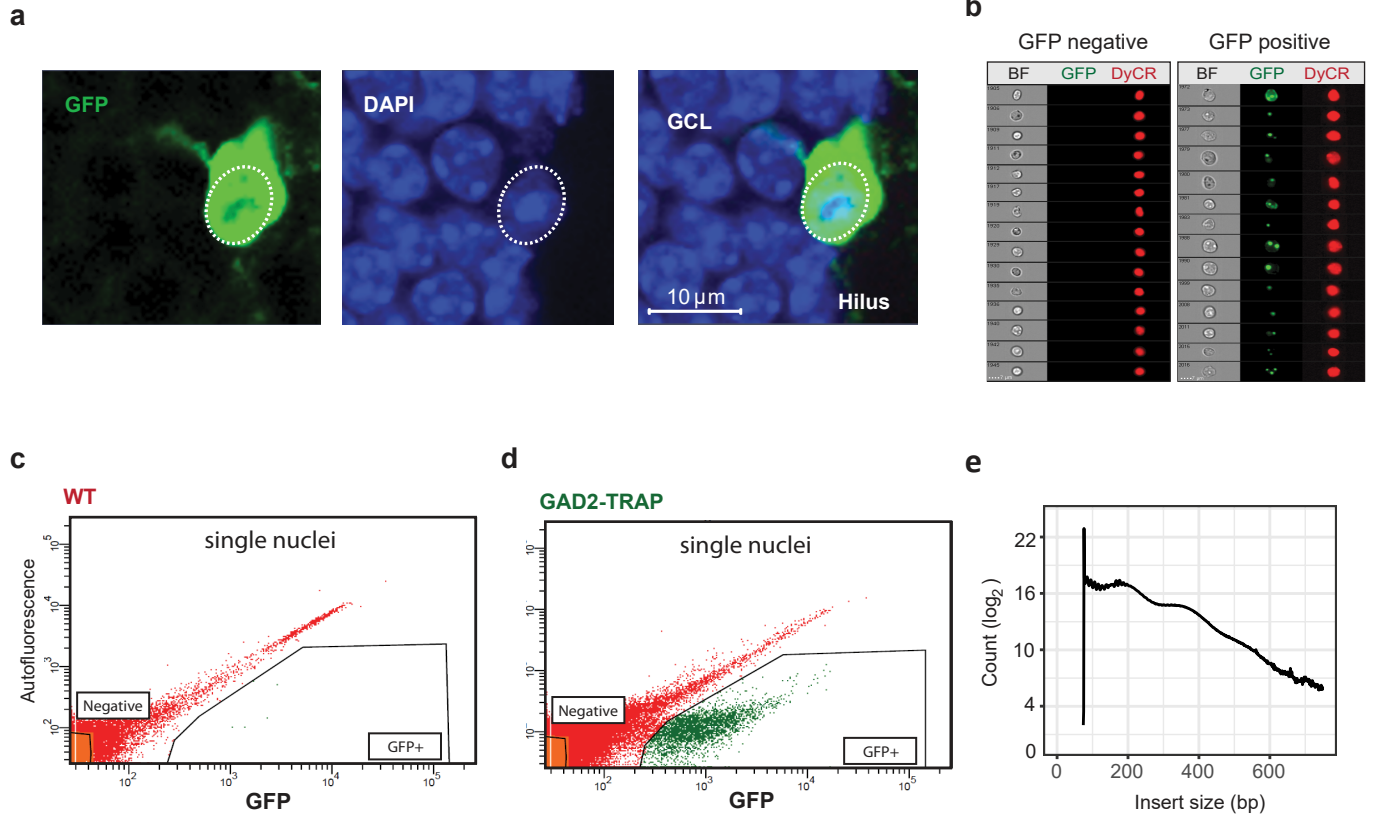



**Figure S5**

**a**

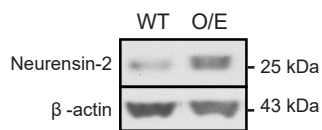

**b**

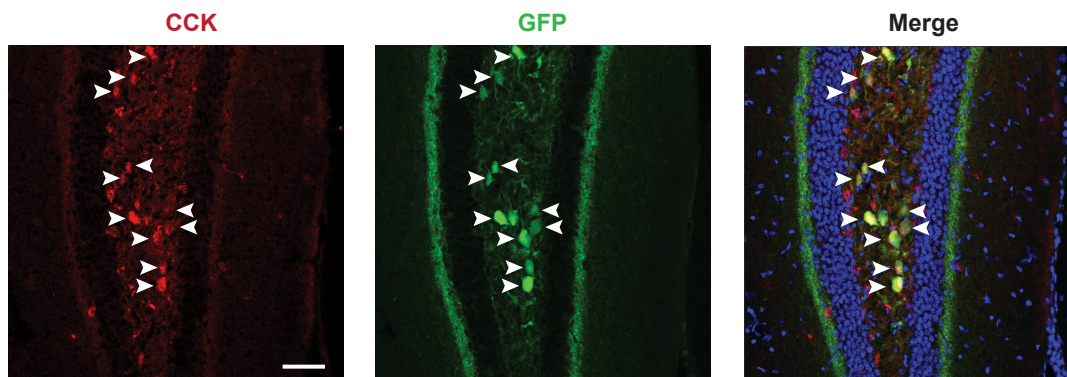

**c**

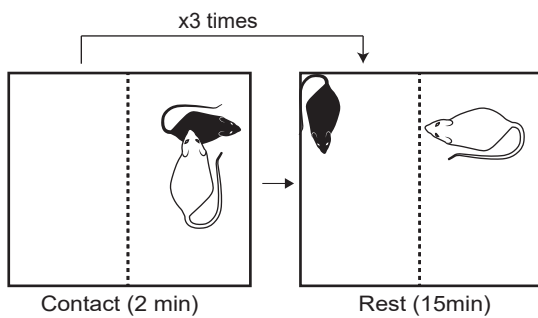

**d**

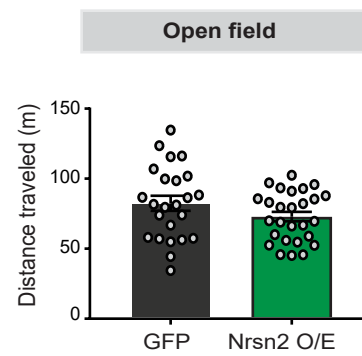

**e**

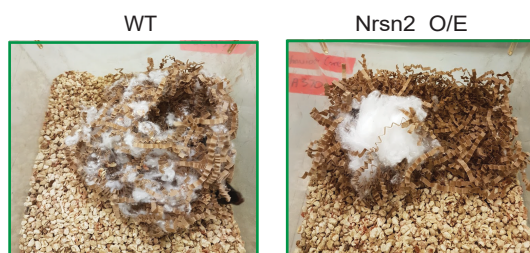

**f**

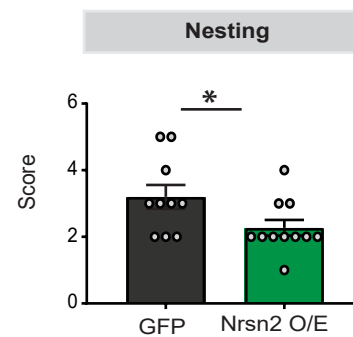

Figure S6

a

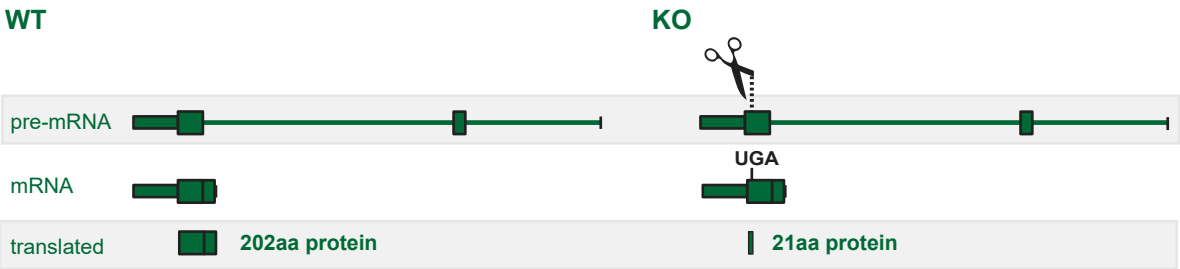

b

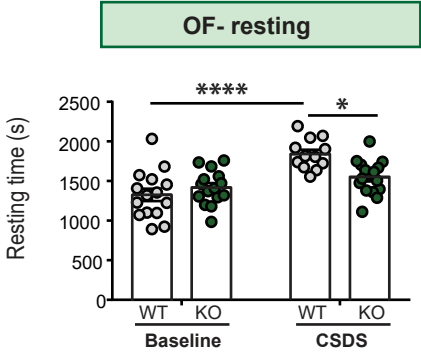

c

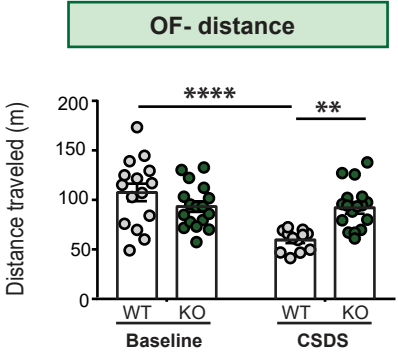



Figure S7

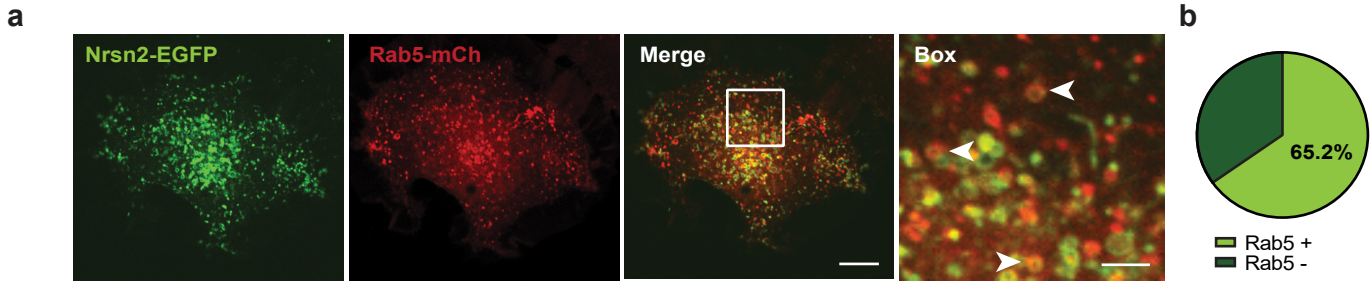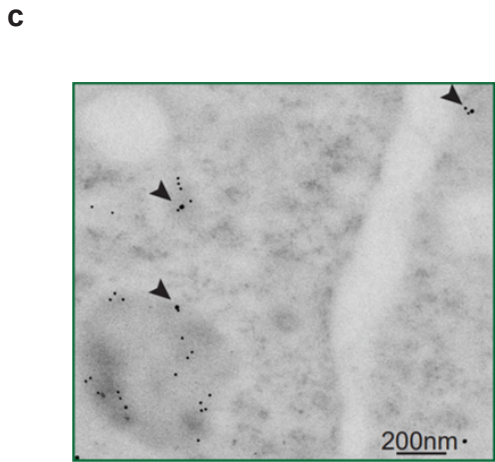

## Supplemental figures legends

### **Figure S1. Generation, validation and characterization of SMARCA3 cKO-CCK mice. Related to Figure 1.**

(a) Bar graph showing the enrichment of SMARCA3 gene (*Hltf*) in different hippocampal cell-types, compared to bulk mRNA preparation. TRAP data was obtained from cholecystokinin (CCK, n = 10) parvalbumin (PV) granule cells (CG), CA1, CA2 and CA3 neurons (n = 3/ group).

(b-c) WT or mice with SMARCA3 conditional KO in PV cells (cKO-PV) were tested behaviorally: (b) FST, forced swim test, unpaired t-test, n = 20, 20. (c) TST, tail suspension test, unpaired t-test, n = 22, 22.

(d-e) WT or mice with SMARCA3 conditional KO in CCK cells (cKO-CCK) were tested behaviorally:

(d) EPM, elevated plus maze, unpaired t-test, \*\*\*p<0.0001, n = 21, 24. (e) open field, \*\*\*p = 0.0001, n = 11, 11. (f) Bar graph of distance travelled in the open field test. unpaired t-test; p=0.17, n = 11, 11.

(g) Schematic of breeding cKO-CCK mice and experimental design. Mice with exons 11-13 of *hltf* flanked by LoxP ( $SMARCA3^{fl/fl}$ ) were used to target SMARCA3 deletion. Breeding mice carrying cre-recombinase (*cre*) under the CCK promoter ( $SMARCA3^{fl/fl}$  CCK-cre<sup>+/-</sup>) with mice carrying flox-stop-flox-EGFP-L10a ( $SMARCA3^{fl/fl}$  -L10<sup>+/-</sup>) generated 3 groups of experimental mice; mice carrying only cre ( $SMARCA3^{fl/fl}$  CCK-cre<sup>+</sup>, L10<sup>-</sup>) were used as cKO-CCK for behavioral tests. Mice carrying neither cre nor EGFP-L10a ( $SMARCA3^{fl/fl}$  CCK-cre<sup>-</sup>, L10<sup>-</sup>) were used as control in behavioral tests. Mice carrying both cre and EGFP-L10a ( $SMARCA3^{fl/fl}$  CCK-cre<sup>+</sup>, L10<sup>+</sup>) were used as cKO for TRAP RNAseq and ATAC-seq. WT mice carrying CCK-cre<sup>+</sup> and L10<sup>+</sup> were used as TRAP controls (not shown).

(h) Representative image of GFP expression in the dentate gyrus (DG) of CCK-TRAP mouse. Scale bar, 20  $\mu$ M.



(i) Bar graph of translated gene expression levels in CCK cells for 3 genes: *Cck*, parvalbumin (*Pvalb*), and somatostatin (*Sst*). Data is represented as percentage (enrichment) of the gene levels in the bulk mRNA (100%, dashed line). One way ANOVA; \*\*\*\*  $p < 0.0001$ ,  $n = 9, 10$ .

(j) qPCR analysis of SMARCA3 translated mRNA levels in CCK cells. Translated mRNA from CCK hippocampal cells was isolated from WT ( $n = 15$  from 30 mice) and cKO-CCK mice ( $n = 17$  from 34 mice). Unpaired t-test; \*\*\*\*  $p < 0.0001$ .

(k) qPCR analysis of SMARCA3 transcript levels in bulk hippocampal mRNA extraction from WT mice and cKO-CCK. Unpaired t-test,  $n = 5/$  group.

(l-m) Cumulative percentage graphs of AMPA mPSCs frequency (l) and amplitude (m) in SGZ CCK neurons. WT mice,  $n=4,824$  events, 10 cells, 5 mice. cKO-CCK mice  $n=849$ , 10, 4.

(n) Averaged AMPA mPSCs traces in DG SGZ CCK neurons, as measured from WT and cKO-CCK mice.

(o) Decay time ( $\tau$ ) of AMPA mPSCs in DG SGZ CCK neurons, as measured from WT ( $n=10$  cells, 5 mice) and cKO-CCK mice ( $n=10$  cells, 4 mice). Unpaired t-test;  $p = 0.22$ .

**Figure S2. Cellular localization of Neurensin-2 in inhibitory neurons. Related to Figure 2.**

(a) Representative immunohistochemical images showing localization of Neurensin-2 in CCK interneurons in the DG. Mice expressing Cre in CCK cells were injected with AAV2-FLEX-GFP and after 21 days were subjected to transcardial perfusion followed by immunolabeling of Neurensin-2 and GFP. Arrowheads point to GFP positive CCK cells that are co-express Neurensin-2. Asterisks mark Neurensin-2 expressing cells that are GFP negative (non-CCK cells). Scale bars: 50  $\mu\text{m}$ , box: 20  $\mu\text{m}$ .

(b) Representative immunohistochemical images showing localization of Neurensin-2 in interneurons in different structures of the hippocampal formation (CA1-CA3) and in cerebral Purkinje cells. Blue, DAPI. Scale bars: 50  $\mu\text{m}$ . Nissl staining was adapted from Allan Brain Atlas.

(c) Immunoblot scan (top) and quantification (bottom) of Neurensin-1 in hippocampi from WT and from mice with SMARCA3 deletion in CCK cells (cKO). Unpaired t-test,  $p = 0.37$ ,  $n = 4$  mice /group.

**Figure S3. Neurensin-2 is up-regulated in stress-sensitive mice. Related to Figure 3.**

(a-b) Bar graphs showing the social interaction test (SI) following chronic social defeat stress (CSDS). (a) SI ratio of time spent exploring a novel aggressor compared to time spent exploring an empty mesh. One way ANOVA;  $F(2, 53) = 57.5$ , \*\*\*\* $p < 0.0001$ ,  $n = 19, 20, 17$ . (b) Time spent interacting with a novel aggressor. One way ANOVA;  $F(2, 53) = 46.0$ , \*\*\*\* $p < 0.0001$ ,  $n = 19, 20, 17$ . Mice selected for biochemical analysis are represented in red circles. Con, control; sen, sensitive; res, resilient

(c-d) Western blot scans (top) and quantification (bottom) of hippocampal cytosolic Neurensin-2 (c), and nuclear SMARCA3 (d). One way ANOVA;  $F(2, 9) = 7.93$  \* $p = 0.020$ ; \*\* $p = 0.001$  (Neurensin-2), \*\* $p = 0.009$  (SMARCA3), \*\*\* $p = 0.0004$ ,  $n = 4, 4, 4$  mice. con, control; sen, sensitive; res, resilient.

(e-g) Western blot scan (top) and quantification (bottom) of Neurensin-2 protein expression in the prefrontal cortex (e), amygdala (f) and nucleus accumbens (g) of control mice and stress-sensitive mice after chronic social defeat stress (CSDS). t-test, \* $p = 0.036$ , \*\* $p = 0.0014$  for prefrontal cortex, \*\* $p = 0.0096$  for amygdala.  $n = 4-5$ /group.

Data are presented as means  $\pm$  SEM.

**Figure S4. Validations of ATAC-seq. Related to Figure 3.**

(a) Magnified images of the GFP and DAPI channels from Figure 3g. GCL, granule cell layer.

(b) After sorting, cell nuclei are purified and intact as verified by Amnis ImageStream analysis.

Representative results from post-sort fractions of GAD2-TRAP hippocampi. Bright-field (BF), GFP and dyecycle ruby (DyCR) are shown. Original magnification 40x.

(c-d) Fluorescence intensity scatter plots from WT (c) and GAD2<sup>TRAP</sup> mice (d). GFP positive cell nuclei are shown in the gating box.



(e) A representative ATAC sequencing fragment length distribution.

**Figure S5. Neurensin-2 overexpression in DG CCK neurons impairs nesting behavior. Related to Figure 4.**

(a) Neurensin-2 protein analysis from hippocampi of a WT mouse and a mouse with viral-mediated *Nrsn2* O/E in CCK cells.

(b) Representative immunohistochemical images showing localization of Neurensin-2 in DG CCK interneurons. Mice were injected with AAV2-Flex-GFP virus to the DG and after 21 days were injected i.c.v with colchicine. Blue, DAPI. Arrowheads point to CCK positive cells that are transfected with the virus (GFP). Scale bar: 50  $\mu$ m.

(c) Schematic of the Subthreshold Social Defeat Stress (SSDS) paradigm.

(d) Bar graph of distance travelled by mice during the open field test. Unpaired t-test;  $p = 0.13$ ,  $n = 24$ , 27.

(e) Representative images of nesting behavior of GFP and *Nrsn2* overexpressing mice (*Nrsn2* O/E).

(f) Bar graph summarizing nesting behavior in WT and *Nrsn2* O/E. Unpaired t-test,  $*p = 0.040$ ,  $n = 10$ , 11.

Data in b and d are represented as means  $\pm$  SEM.

**Figure S6. Generation and behavioral characterization of *Nrsn2* KO mice. Related to Figure 4.**

(a) Schematic of *Nrsn2* KO mice generation. 5bp deletion in exon 2 of *Nrsn2* gene by CRISPR-Cas9 results in reading-frame shift and the creation of an early stop codon (UGA). The translated protein is a 22 amino acids protein instead of the WT 202 amino acids full length protein.

(b-c) WT or Nrsn2 KO mice were subjected to the open field test following chronic social defeat. (b) Resting time. Two-way ANOVA; interaction,  $F(1, 54) = 9.417$ ,  $P = 0.0034$ ; stress,  $P < 0.0001$ ; genotype,  $P = 0.113$ . \* $p = 0.010$ , \*\*\*\* $p < 0.0001$ ,  $n = 12-16$ . (c) Distance traveled for 60 min. Two-way ANOVA; interaction,  $F(1, 54) = 15.66$ ,  $P = 0.0002$ ; stress,  $P = 0.0008$ ; genotype,  $P = 0.112$ , \*\*  $p = 0.0017$ , \*\*\*\* $p < 0.0001$ ,  $n = 12-16$ .

Data in b and c are represented as means  $\pm$  SEM.

**Figure S7. Neurensin-2 is expressed in endosomes in neuronal N2a cells. Related to Figure 5.**

(a-b) Representative images of live-cell imaging (a) and pie chart summary (b) showing colocalization of EGFP-tagged Neurensin-2 protein with mCherry-tagged Rab5 (Rab5-mCh) in N2a cells. Arrowheads indicate co-labeled vesicle-like structures. Scale bars: Merge, 5  $\mu\text{m}$ ; box, 1  $\mu\text{m}$ .  $n = 115$  vesicles, 8 cells.

(c) Immuno electron-microscopy image showing by arrowheads the proximate labeling of clathrin heavy-chain (18nm) and EGFP-tagged Neurensin-2 (12nm) on vesicle structures in N2a cells transfected with EGFP tagged Neurensin-2.
