# Supplementary material for: Identification of Neurensin-2 as a novel modulator of emotional behavior
Source: PubMed Central journal article supplement (PMC8505262; doi:10.1038/s41380-021-01058-5), 2021-03-19
Supplement: 41380_2021_1058_MOESM3_ESM.pdf [file 41380_2021_1058_MOESM3_ESM.pdf]

**Table S1- RNA seq : CCK TRAP****All CCK changed genes**

| GeneSymbol | cckKO_meanRPKM | wt_meanRPKM | wt-cckKO_logFC | wt-cckKO_PValue | wt-cckKO_FDR |
|------------|----------------|-------------|----------------|-----------------|--------------|
| Nrsn2      | 209.13         | 76.13       | -1.50          | 6.57E-16        | 1.01E-11     |
| Gm14164    | 11.39          | 2.89        | -2.02          | 9.71E-13        | 7.46E-09     |
| Syp        | 99.30          | 56.30       | -0.85          | 1.14E-08        | 5.82E-05     |
| Gm10359    | 43.41          | 21.58       | -1.04          | 4.14E-07        | 1.59E-03     |
| Eif6       | 11.77          | 5.99        | -1.01          | 6.40E-07        | 1.97E-03     |
| Phyhip     | 74.54          | 44.91       | -0.77          | 2.27E-06        | 3.87E-03     |
| mt-Rnr1    | 931.24         | 364.56      | -1.37          | 1.92E-06        | 3.87E-03     |
| Gm7336     | 39.44          | 21.42       | -0.92          | 1.93E-06        | 3.87E-03     |
| Gm26917    | 58.61          | 17.58       | -1.78          | 2.25E-06        | 3.87E-03     |
| Ctsd       | 32.40          | 20.00       | -0.73          | 1.04E-05        | 1.59E-02     |
| Caskin1    | 14.60          | 9.74        | -0.62          | 1.64E-05        | 2.11E-02     |
| Gm14703    | 46.88          | 28.50       | -0.75          | 1.62E-05        | 2.11E-02     |
| Gna11      | 16.27          | 10.62       | -0.65          | 2.08E-05        | 2.46E-02     |
| Casp1      | 1.20           | 4.19        | 1.76           | 2.49E-05        | 2.46E-02     |
| Gse1       | 24.02          | 12.13       | -1.03          | 3.20E-05        | 2.46E-02     |
| Atp1a3     | 163.97         | 110.62      | -0.60          | 2.38E-05        | 2.46E-02     |
| Selenow    | 126.96         | 65.41       | -1.00          | 2.94E-05        | 2.46E-02     |
| Chtf8      | 10.79          | 6.31        | -0.81          | 2.62E-05        | 2.46E-02     |
| Chchd2     | 200.96         | 296.74      | 0.53           | 3.05E-05        | 2.46E-02     |
| Gm14760    | 39.28          | 22.21       | -0.86          | 2.90E-05        | 2.46E-02     |
| Gm12070    | 26.06          | 15.40       | -0.80          | 3.36E-05        | 2.46E-02     |
| Unc5a      | 21.16          | 13.59       | -0.68          | 4.09E-05        | 2.78E-02     |
| Rpl12      | 34.99          | 52.21       | 0.54           | 4.16E-05        | 2.78E-02     |
| Gins2      | 33.41          | 18.10       | -0.93          | 4.67E-05        | 2.93E-02     |
| Adgrb1     | 16.08          | 10.20       | -0.69          | 4.77E-05        | 2.93E-02     |
| Slc17a7    | 162.97         | 118.74      | -0.49          | 4.96E-05        | 2.93E-02     |
| Edf1       | 83.38          | 57.16       | -0.58          | 6.35E-05        | 3.52E-02     |
| Gm21984    | 6.67           | 2.22        | -1.63          | 6.40E-05        | 3.52E-02     |
| Rps27a     | 64.86          | 98.38       | 0.57           | 7.53E-05        | 3.86E-02     |
| Tra2a      | 19.01          | 91.53       | 2.24           | 7.32E-05        | 3.86E-02     |
| Prrt2      | 141.08         | 92.09       | -0.65          | 7.84E-05        | 3.89E-02     |
| Pagr1a     | 106.82         | 69.93       | -0.65          | 8.64E-05        | 4.15E-02     |
| Cyb5r3     | 12.81          | 6.74        | -0.97          | 9.49E-05        | 4.35E-02     |
| Slc6a11    | 4.03           | 2.07        | -0.99          | 9.88E-05        | 4.35E-02     |
| Gm8430     | 142.03         | 221.51      | 0.61           | 9.90E-05        | 4.35E-02     |
| Syt2       | 0.38           | 1.05        | 1.45           | 1.06E-04        | 4.48E-02     |
| Jarid2     | 3.00           | 5.92        | 0.95           | 1.08E-04        | 4.48E-02     |
| Sap30      | 10.15          | 21.15       | 1.03           | 1.20E-04        | 4.87E-02     |
| mt-Co1     | 142.99         | 82.68       | -0.82          | 1.46E-04        | 5.76E-02     |
| Gm12671    | 37.71          | 22.02       | -0.81          | 1.50E-04        | 5.76E-02     |
| Hmgcs1     | 21.54          | 31.70       | 0.52           | 1.59E-04        | 5.82E-02     |
| Gm12537    | 37.49          | 21.91       | -0.81          | 1.57E-04        | 5.82E-02     |
| Rpl27a     | 71.12          | 102.23      | 0.49           | 1.74E-04        | 6.23E-02     |
| Lpcat4     | 19.62          | 12.00       | -0.75          | 1.85E-04        | 6.24E-02     |
| Ttll3      | 10.60          | 6.61        | -0.72          | 1.82E-04        | 6.24E-02     |
| Arhgap23   | 4.51           | 2.61        | -0.82          | 1.87E-04        | 6.24E-02     |
| Nkiras1    | 31.82          | 45.46       | 0.48           | 2.02E-04        | 6.61E-02     |
| Tnrc18     | 3.01           | 1.13        | -1.46          | 2.36E-04        | 7.39E-02     |
| Rps27a-ps2 | 104.53         | 163.98      | 0.62           | 2.32E-04        | 7.39E-02     |

|          |          |          |       |          |          |
|----------|----------|----------|-------|----------|----------|
| mt-Rnr2  | 926.82   | 406.87   | -1.21 | 2.42E-04 | 7.44E-02 |
| Sorcs2   | 1.94     | 1.11     | -0.84 | 2.55E-04 | 7.55E-02 |
| mt-Cytb  | 69.93    | 40.97    | -0.80 | 2.54E-04 | 7.55E-02 |
| Rptor    | 3.31     | 2.16     | -0.65 | 2.85E-04 | 8.10E-02 |
| mt-Nd1   | 97.19    | 59.03    | -0.75 | 2.80E-04 | 8.10E-02 |
| Prrc2a   | 26.93    | 19.05    | -0.54 | 3.04E-04 | 8.50E-02 |
| Reep2    | 20.77    | 13.12    | -0.70 | 3.16E-04 | 8.66E-02 |
| Nlrx1    | 1.18     | 0.37     | -1.70 | 3.29E-04 | 8.87E-02 |
| Lrrn2    | 46.69    | 32.64    | -0.55 | 3.36E-04 | 8.91E-02 |
| Trp53i11 | 10.12    | 6.43     | -0.69 | 3.42E-04 | 8.91E-02 |
| Nts      | 3.27     | 8.45     | 1.35  | 3.55E-04 | 8.94E-02 |
| Gm26767  | 0.58     | 1.48     | 1.32  | 3.50E-04 | 8.94E-02 |
| Tpd52l1  | 26.97    | 43.15    | 0.65  | 3.71E-04 | 8.94E-02 |
| Fgf5     | 6.95     | 12.59    | 0.83  | 3.84E-04 | 8.94E-02 |
| Basp1    | 637.41   | 829.45   | 0.35  | 3.61E-04 | 8.94E-02 |
| Zfp710   | 2.63     | 1.24     | -1.11 | 3.83E-04 | 8.94E-02 |
| Haus3    | 1.11     | 3.75     | 1.73  | 3.84E-04 | 8.94E-02 |
| Ptprs    | 35.08    | 25.54    | -0.49 | 4.11E-04 | 9.24E-02 |
| Ncor2    | 6.81     | 4.48     | -0.64 | 4.06E-04 | 9.24E-02 |
| Col4a2   | 2.17     | 1.14     | -0.97 | 4.15E-04 | 9.24E-02 |
| Ggct     | 6.82     | 10.65    | 0.61  | 4.79E-04 | 9.71E-02 |
| Grina    | 159.36   | 121.49   | -0.42 | 4.58E-04 | 9.71E-02 |
| Scg5     | 120.79   | 73.49    | -0.75 | 4.72E-04 | 9.71E-02 |
| Rgs2     | 34.45    | 49.65    | 0.50  | 4.44E-04 | 9.71E-02 |
| Hyou1    | 5.29     | 3.26     | -0.73 | 4.80E-04 | 9.71E-02 |
| Galnt17  | 8.52     | 6.19     | -0.49 | 4.64E-04 | 9.71E-02 |
| Gm23935  | 52440.63 | 34563.67 | -0.63 | 4.79E-04 | 9.71E-02 |
| Cnnm1    | 32.40    | 23.98    | -0.47 | 5.05E-04 | 1.01E-01 |
| Bcl9l    | 4.89     | 2.59     | -0.96 | 5.23E-04 | 1.03E-01 |
| Has3     | 3.40     | 2.09     | -0.74 | 5.44E-04 | 1.05E-01 |
| Eid2     | 56.55    | 80.94    | 0.49  | 5.37E-04 | 1.05E-01 |
| Hsbp1l1  | 0.32     | 2.02     | 2.60  | 6.18E-04 | 1.17E-01 |
| Aldh1l2  | 0.24     | 0.03     | -3.03 | 6.31E-04 | 1.18E-01 |
| Jag2     | 0.49     | 0.11     | -2.14 | 7.07E-04 | 1.19E-01 |
| Grik5    | 16.77    | 10.99    | -0.65 | 6.47E-04 | 1.19E-01 |
| Ddx46    | 6.98     | 10.34    | 0.54  | 7.23E-04 | 1.19E-01 |
| Nudt16l1 | 24.04    | 35.65    | 0.54  | 7.43E-04 | 1.19E-01 |
| Grin1    | 23.56    | 15.17    | -0.67 | 6.62E-04 | 1.19E-01 |
| Dennd1a  | 9.87     | 6.59     | -0.62 | 6.96E-04 | 1.19E-01 |
| Dusp26   | 11.13    | 18.25    | 0.68  | 6.64E-04 | 1.19E-01 |
| Ttn      | 0.04     | 0.01     | -1.92 | 6.84E-04 | 1.19E-01 |
| Gm13691  | 5.48     | 1.30     | -2.12 | 7.76E-04 | 1.19E-01 |
| NA       | 0.62     | 0.00     | -8.14 | 6.70E-04 | 1.19E-01 |
| Gm6222   | 94.49    | 137.73   | 0.51  | 6.89E-04 | 1.19E-01 |
| Gm13698  | 5.48     | 1.30     | -2.12 | 7.75E-04 | 1.19E-01 |
| Gm13693  | 5.48     | 1.30     | -2.12 | 7.76E-04 | 1.19E-01 |
| Gm13697  | 5.48     | 1.30     | -2.12 | 7.76E-04 | 1.19E-01 |
| Gm13694  | 5.48     | 1.30     | -2.12 | 7.73E-04 | 1.19E-01 |
| Gm13696  | 5.48     | 1.30     | -2.12 | 7.72E-04 | 1.19E-01 |
| Gm13695  | 5.50     | 1.30     | -2.13 | 7.56E-04 | 1.19E-01 |
| Gm26602  | 30.71    | 12.87    | -1.29 | 7.09E-04 | 1.19E-01 |
| Ube2e1   | 19.10    | 27.19    | 0.48  | 7.94E-04 | 1.21E-01 |

|               |         |         |       |          |          |
|---------------|---------|---------|-------|----------|----------|
| Syt17         | 33.84   | 23.89   | -0.54 | 8.11E-04 | 1.22E-01 |
| Vti1b         | 49.48   | 70.46   | 0.48  | 8.39E-04 | 1.24E-01 |
| Pcnx2         | 6.57    | 4.54    | -0.57 | 8.31E-04 | 1.24E-01 |
| Prrt1         | 150.15  | 103.56  | -0.57 | 8.82E-04 | 1.29E-01 |
| Mir6236       | 1098.47 | 480.95  | -1.23 | 9.39E-04 | 1.36E-01 |
| Tmem132a      | 1.66    | 0.82    | -1.05 | 9.67E-04 | 1.38E-01 |
| Nfic          | 6.55    | 4.31    | -0.64 | 9.62E-04 | 1.38E-01 |
| Rogdi         | 98.04   | 71.02   | -0.50 | 1.01E-03 | 1.39E-01 |
| Hmgn1         | 21.17   | 29.49   | 0.45  | 1.02E-03 | 1.39E-01 |
| Elfn2         | 14.97   | 9.53    | -0.69 | 1.02E-03 | 1.39E-01 |
| Spock2        | 67.91   | 48.12   | -0.54 | 1.02E-03 | 1.39E-01 |
| NA            | 1.93    | 0.57    | -1.79 | 9.93E-04 | 1.39E-01 |
| Slc22a15      | 1.86    | 0.20    | -3.28 | 1.05E-03 | 1.39E-01 |
| Rai1          | 6.40    | 4.53    | -0.54 | 1.04E-03 | 1.39E-01 |
| Eif5a         | 84.29   | 56.57   | -0.61 | 1.04E-03 | 1.39E-01 |
| Ubal1         | 11.08   | 8.04    | -0.50 | 1.06E-03 | 1.39E-01 |
| Neur1a        | 8.70    | 6.01    | -0.57 | 1.07E-03 | 1.39E-01 |
| Fam45a        | 11.11   | 7.31    | -0.63 | 1.12E-03 | 1.42E-01 |
| Slit1         | 7.70    | 5.31    | -0.57 | 1.12E-03 | 1.42E-01 |
| Kcnc3         | 15.08   | 10.34   | -0.58 | 1.10E-03 | 1.42E-01 |
| Tmem121b      | 8.49    | 5.51    | -0.66 | 1.12E-03 | 1.42E-01 |
| Setd1a        | 7.77    | 5.03    | -0.67 | 1.14E-03 | 1.42E-01 |
| Pom121        | 22.93   | 16.74   | -0.49 | 1.15E-03 | 1.43E-01 |
| Slc35a4       | 13.13   | 8.45    | -0.67 | 1.19E-03 | 1.45E-01 |
| Arid4b        | 3.47    | 5.06    | 0.51  | 1.19E-03 | 1.45E-01 |
| mt-Nd5        | 65.11   | 45.06   | -0.56 | 1.18E-03 | 1.45E-01 |
| Man1c1        | 4.15    | 2.54    | -0.74 | 1.23E-03 | 1.46E-01 |
| Grin1os       | 22.37   | 13.24   | -0.80 | 1.24E-03 | 1.46E-01 |
| Cox16         | 16.96   | 23.96   | 0.47  | 1.22E-03 | 1.46E-01 |
| Tmem63c       | 7.14    | 4.57    | -0.68 | 1.27E-03 | 1.47E-01 |
| Mcrip1        | 8.24    | 4.32    | -0.96 | 1.26E-03 | 1.47E-01 |
| Sema4f        | 10.39   | 6.77    | -0.66 | 1.29E-03 | 1.49E-01 |
| Scap          | 6.31    | 4.24    | -0.61 | 1.31E-03 | 1.50E-01 |
| Sh3bp1        | 9.65    | 6.61    | -0.58 | 1.36E-03 | 1.54E-01 |
| Gm12350       | 231.58  | 322.87  | 0.45  | 1.35E-03 | 1.54E-01 |
| Ywhah         | 1358.06 | 1688.52 | 0.28  | 1.44E-03 | 1.59E-01 |
| Zrsr1         | 11.15   | 16.19   | 0.50  | 1.44E-03 | 1.59E-01 |
| Rad21l        | 0.20    | 1.17    | 2.55  | 1.43E-03 | 1.59E-01 |
| Tmem254b      | 13.44   | 25.66   | 0.89  | 1.49E-03 | 1.61E-01 |
| Tmem254a      | 13.44   | 25.66   | 0.89  | 1.49E-03 | 1.61E-01 |
| Gm26821       | 40.45   | 27.47   | -0.60 | 1.48E-03 | 1.61E-01 |
| Rheb          | 24.46   | 34.06   | 0.45  | 1.57E-03 | 1.69E-01 |
| Prpf39        | 56.99   | 77.17   | 0.41  | 1.59E-03 | 1.69E-01 |
| 2810455O05Rik | 7.04    | 11.94   | 0.73  | 1.59E-03 | 1.69E-01 |
| Slc25a22      | 14.07   | 9.42    | -0.62 | 1.64E-03 | 1.71E-01 |
| Rtraf         | 66.49   | 91.59   | 0.43  | 1.64E-03 | 1.71E-01 |
| Mbd1          | 2.16    | 4.83    | 1.14  | 1.65E-03 | 1.71E-01 |
| Ly6e          | 101.41  | 78.30   | -0.41 | 1.71E-03 | 1.71E-01 |
| Gnl1          | 13.59   | 19.59   | 0.50  | 1.67E-03 | 1.71E-01 |
| Cln3          | 1.10    | 0.41    | -1.46 | 1.68E-03 | 1.71E-01 |
| Atp6v0e2      | 72.30   | 54.58   | -0.44 | 1.72E-03 | 1.71E-01 |
| Commd7        | 4.25    | 6.52    | 0.58  | 1.71E-03 | 1.71E-01 |

|               |          |          |       |          |          |
|---------------|----------|----------|-------|----------|----------|
| Gm2606        | 24.54    | 15.30    | -0.71 | 1.71E-03 | 1.71E-01 |
| Lynx1         | 78.90    | 60.55    | -0.42 | 1.87E-03 | 1.73E-01 |
| Tsc22d3       | 7.04     | 11.66    | 0.70  | 1.87E-03 | 1.73E-01 |
| Zbed5         | 52.35    | 73.58    | 0.46  | 1.84E-03 | 1.73E-01 |
| Prrc2b        | 29.69    | 22.11    | -0.46 | 1.87E-03 | 1.73E-01 |
| Plppr2        | 29.94    | 19.64    | -0.65 | 1.78E-03 | 1.73E-01 |
| Hebp1         | 68.17    | 105.24   | 0.60  | 1.83E-03 | 1.73E-01 |
| Tmem254c      | 15.53    | 29.42    | 0.88  | 1.86E-03 | 1.73E-01 |
| Pin4          | 30.73    | 46.24    | 0.56  | 1.77E-03 | 1.73E-01 |
| Pabpc1l2b-ps  | 18.82    | 9.92     | -0.96 | 1.84E-03 | 1.73E-01 |
| Lrch4         | 3.35     | 1.87     | -0.88 | 1.80E-03 | 1.73E-01 |
| Muc3a         | 0.12     | 0.99     | 3.04  | 1.78E-03 | 1.73E-01 |
| NA            | 5.31     | 0.70     | -2.95 | 1.82E-03 | 1.73E-01 |
| Psd           | 56.17    | 34.98    | -0.72 | 1.91E-03 | 1.73E-01 |
| Prr12         | 11.09    | 5.38     | -1.09 | 1.92E-03 | 1.73E-01 |
| Naca          | 29.02    | 38.27    | 0.37  | 1.91E-03 | 1.73E-01 |
| Zfp26         | 3.80     | 2.56     | -0.60 | 1.91E-03 | 1.73E-01 |
| Gm24187       | 31260.76 | 21893.46 | -0.55 | 1.94E-03 | 1.75E-01 |
| Prkaca        | 115.86   | 87.13    | -0.45 | 2.00E-03 | 1.77E-01 |
| Cntnap1       | 15.88    | 11.52    | -0.50 | 2.01E-03 | 1.77E-01 |
| Gm10222       | 92.45    | 52.66    | -0.84 | 1.99E-03 | 1.77E-01 |
| Shank3        | 3.17     | 1.85     | -0.81 | 2.08E-03 | 1.81E-01 |
| mt-Nd4l       | 92.67    | 52.84    | -0.84 | 2.07E-03 | 1.81E-01 |
| Rsrp1         | 5.63     | 9.77     | 0.75  | 2.14E-03 | 1.84E-01 |
| Meis3         | 4.22     | 2.34     | -0.89 | 2.12E-03 | 1.84E-01 |
| Ube2s         | 17.71    | 9.26     | -0.97 | 2.14E-03 | 1.84E-01 |
| Dck           | 7.20     | 11.28    | 0.62  | 2.19E-03 | 1.85E-01 |
| Gm13304       | 22.63    | 11.92    | -0.97 | 2.16E-03 | 1.85E-01 |
| Gm21541       | 21.84    | 11.50    | -0.97 | 2.18E-03 | 1.85E-01 |
| BC052040      | 4.73     | 8.35     | 0.79  | 2.22E-03 | 1.86E-01 |
| Fyb2          | 2.02     | 4.04     | 0.97  | 2.22E-03 | 1.86E-01 |
| Tmem126a      | 39.54    | 28.67    | -0.50 | 2.27E-03 | 1.88E-01 |
| Krt20         | 0.39     | 1.42     | 1.84  | 2.28E-03 | 1.88E-01 |
| Cox6c         | 88.81    | 119.05   | 0.39  | 2.30E-03 | 1.89E-01 |
| Rpl4          | 196.12   | 257.13   | 0.36  | 2.32E-03 | 1.89E-01 |
| Kdm6b         | 2.97     | 1.57     | -0.96 | 2.36E-03 | 1.89E-01 |
| Bcor          | 3.45     | 1.69     | -1.07 | 2.37E-03 | 1.89E-01 |
| Map10         | 1.36     | 0.54     | -1.36 | 2.36E-03 | 1.89E-01 |
| Gm13292       | 231.03   | 134.97   | -0.81 | 2.38E-03 | 1.89E-01 |
| A230005M16Rik | 19.30    | 11.20    | -0.83 | 2.34E-03 | 1.89E-01 |
| Dctd          | 0.73     | 1.79     | 1.27  | 2.42E-03 | 1.91E-01 |
| Arpc4         | 44.75    | 32.32    | -0.50 | 2.41E-03 | 1.91E-01 |
| Fgd6          | 0.67     | 0.27     | -1.36 | 2.44E-03 | 1.91E-01 |
| Acp5          | 0.36     | 0.02     | -4.21 | 2.47E-03 | 1.92E-01 |
| Tnfrsf13c     | 0.09     | 0.74     | 2.91  | 2.47E-03 | 1.92E-01 |
| Tmcc2         | 6.17     | 4.20     | -0.59 | 2.50E-03 | 1.93E-01 |
| Nfasc         | 22.71    | 17.03    | -0.45 | 2.52E-03 | 1.94E-01 |
| Ndufa6        | 165.52   | 222.69   | 0.40  | 2.55E-03 | 1.95E-01 |
| Shank1        | 100.40   | 61.87    | -0.74 | 2.56E-03 | 1.95E-01 |
| Slc9a1        | 9.40     | 6.57     | -0.55 | 2.57E-03 | 1.95E-01 |
| Fancg         | 1.25     | 0.46     | -1.46 | 2.61E-03 | 1.96E-01 |
| Syt9          | 2.22     | 1.14     | -1.00 | 2.62E-03 | 1.96E-01 |

|               |        |        |       |          |          |
|---------------|--------|--------|-------|----------|----------|
| Atn1          | 54.02  | 37.06  | -0.58 | 2.65E-03 | 1.96E-01 |
| L1cam         | 20.11  | 15.43  | -0.42 | 2.65E-03 | 1.96E-01 |
| Tlcd1         | 26.22  | 35.00  | 0.38  | 2.66E-03 | 1.97E-01 |
| Palm          | 9.85   | 6.55   | -0.62 | 2.72E-03 | 2.00E-01 |
| Nwd1          | 0.43   | 0.17   | -1.39 | 2.77E-03 | 2.02E-01 |
| Mon1a         | 3.48   | 1.79   | -0.99 | 2.86E-03 | 2.05E-01 |
| Hic2          | 2.28   | 0.31   | -2.88 | 2.87E-03 | 2.05E-01 |
| Snrpa         | 37.35  | 28.34  | -0.43 | 2.86E-03 | 2.05E-01 |
| Celsr2        | 20.79  | 14.98  | -0.51 | 2.87E-03 | 2.05E-01 |
| Gm16409       | 109.92 | 152.69 | 0.45  | 2.84E-03 | 2.05E-01 |
| Fkbp3         | 375.31 | 490.43 | 0.36  | 2.89E-03 | 2.06E-01 |
| Selenom       | 31.54  | 22.53  | -0.52 | 2.91E-03 | 2.06E-01 |
| Fam216a       | 66.96  | 88.91  | 0.38  | 2.96E-03 | 2.06E-01 |
| Tecr          | 388.86 | 286.08 | -0.48 | 2.95E-03 | 2.06E-01 |
| Rnf144b       | 0.58   | 1.42   | 1.26  | 2.97E-03 | 2.06E-01 |
| 4731419I09Rik | 0.66   | 0.19   | -1.86 | 2.96E-03 | 2.06E-01 |
| Usp54         | 3.16   | 1.99   | -0.70 | 3.01E-03 | 2.09E-01 |
| Aim2          | 0.21   | 0.02   | -3.15 | 3.08E-03 | 2.12E-01 |
| Nsmce4a       | 10.43  | 15.40  | 0.53  | 3.11E-03 | 2.13E-01 |
| Gm11263       | 129.84 | 179.34 | 0.44  | 3.12E-03 | 2.13E-01 |
| Nfs1          | 10.07  | 7.31   | -0.49 | 3.17E-03 | 2.15E-01 |
| Gal3st3       | 87.76  | 62.86  | -0.52 | 3.21E-03 | 2.15E-01 |
| Sec61b        | 38.10  | 55.83  | 0.52  | 3.19E-03 | 2.15E-01 |
| Bbip1         | 44.18  | 58.71  | 0.38  | 3.21E-03 | 2.15E-01 |
| Tet3          | 2.67   | 1.64   | -0.75 | 3.27E-03 | 2.19E-01 |
| AF529169      | 0.29   | 0.03   | -3.16 | 3.31E-03 | 2.19E-01 |
| Bahcc1        | 1.92   | 0.85   | -1.23 | 3.31E-03 | 2.19E-01 |
| Csf1          | 1.35   | 0.64   | -1.10 | 3.41E-03 | 2.20E-01 |
| Grk2          | 10.95  | 8.26   | -0.44 | 3.39E-03 | 2.20E-01 |
| Gm20605       | 2.99   | 1.74   | -0.82 | 3.41E-03 | 2.20E-01 |
| Urb1          | 0.67   | 0.27   | -1.36 | 3.36E-03 | 2.20E-01 |
| Fam204a       | 22.87  | 16.50  | -0.50 | 3.35E-03 | 2.20E-01 |
| Gm21986       | 27.00  | 18.86  | -0.56 | 3.41E-03 | 2.20E-01 |
| Cep41         | 1.31   | 0.59   | -1.18 | 3.51E-03 | 2.25E-01 |
| Syt3          | 13.26  | 8.89   | -0.62 | 3.56E-03 | 2.28E-01 |
| Tomm7         | 57.23  | 78.70  | 0.43  | 3.57E-03 | 2.28E-01 |
| Apc2          | 2.42   | 1.53   | -0.70 | 3.62E-03 | 2.29E-01 |
| Cobll1        | 0.21   | 0.60   | 1.46  | 3.61E-03 | 2.29E-01 |
| Chchd2-ps     | 84.49  | 119.37 | 0.47  | 3.67E-03 | 2.31E-01 |
| 9130019P16Rik | 1.60   | 0.72   | -1.19 | 3.71E-03 | 2.33E-01 |
| Pcdh1         | 39.78  | 30.15  | -0.44 | 3.73E-03 | 2.33E-01 |
| Mpp2          | 31.11  | 22.95  | -0.48 | 3.76E-03 | 2.34E-01 |
| Rps27l        | 25.95  | 40.23  | 0.60  | 3.77E-03 | 2.34E-01 |
| Nsmf          | 39.96  | 31.83  | -0.36 | 3.81E-03 | 2.34E-01 |
| Psmb1         | 89.65  | 120.94 | 0.40  | 3.80E-03 | 2.34E-01 |
| Cox6c2        | 372.58 | 503.26 | 0.40  | 3.84E-03 | 2.35E-01 |
| Porcn         | 16.84  | 12.61  | -0.45 | 3.90E-03 | 2.37E-01 |
| Gm5577        | 154.17 | 122.40 | -0.37 | 3.91E-03 | 2.37E-01 |
| Dcp1b         | 2.10   | 3.25   | 0.60  | 3.93E-03 | 2.38E-01 |
| Cavin2        | 0.30   | 0.90   | 1.58  | 3.96E-03 | 2.39E-01 |
| Cpne9         | 2.11   | 1.23   | -0.81 | 4.05E-03 | 2.41E-01 |
| Slc24a3       | 47.25  | 34.84  | -0.48 | 4.02E-03 | 2.41E-01 |

|              |         |         |       |          |          |
|--------------|---------|---------|-------|----------|----------|
| Umad1        | 12.34   | 16.40   | 0.38  | 4.04E-03 | 2.41E-01 |
| Brms1l       | 26.54   | 35.56   | 0.39  | 4.08E-03 | 2.42E-01 |
| Atp9a        | 9.88    | 7.15    | -0.50 | 4.17E-03 | 2.46E-01 |
| Islr2        | 2.52    | 1.39    | -0.90 | 4.16E-03 | 2.46E-01 |
| NA           | 7.67    | 2.73    | -1.53 | 4.25E-03 | 2.49E-01 |
| Atf7         | 6.43    | 4.49    | -0.55 | 4.24E-03 | 2.49E-01 |
| Zcrb1        | 28.89   | 38.30   | 0.37  | 4.30E-03 | 2.49E-01 |
| Tada3        | 8.37    | 5.91    | -0.54 | 4.29E-03 | 2.49E-01 |
| NA           | 111.04  | 151.63  | 0.42  | 4.28E-03 | 2.49E-01 |
| Eno2         | 86.84   | 64.12   | -0.48 | 4.34E-03 | 2.50E-01 |
| Tbl2         | 3.27    | 2.06    | -0.70 | 4.45E-03 | 2.52E-01 |
| Arl8a        | 64.03   | 45.27   | -0.54 | 4.42E-03 | 2.52E-01 |
| Ulk1         | 19.36   | 14.38   | -0.47 | 4.47E-03 | 2.52E-01 |
| Gapdh        | 533.28  | 412.93  | -0.40 | 4.46E-03 | 2.52E-01 |
| Sarnp        | 30.48   | 43.41   | 0.48  | 4.40E-03 | 2.52E-01 |
| Gm13340      | 19.11   | 11.76   | -0.73 | 4.43E-03 | 2.52E-01 |
| Gcn1l1       | 0.60    | 0.35    | -0.82 | 4.54E-03 | 2.55E-01 |
| Capn1        | 4.01    | 2.18    | -0.92 | 4.61E-03 | 2.55E-01 |
| Ndufaf5      | 32.81   | 44.84   | 0.42  | 4.64E-03 | 2.55E-01 |
| Slitrk5      | 26.21   | 19.75   | -0.44 | 4.63E-03 | 2.55E-01 |
| Gm10123      | 1770.47 | 2233.10 | 0.30  | 4.63E-03 | 2.55E-01 |
| Gm5859       | 9.26    | 5.87    | -0.70 | 4.66E-03 | 2.55E-01 |
| Rps6-ps3     | 133.72  | 182.03  | 0.42  | 4.67E-03 | 2.55E-01 |
| Gm20417      | 55.13   | 30.33   | -0.89 | 4.59E-03 | 2.55E-01 |
| Mobp         | 1.32    | 0.65    | -1.06 | 4.69E-03 | 2.56E-01 |
| Clcn7        | 1.81    | 0.84    | -1.15 | 4.75E-03 | 2.58E-01 |
| Gabra3       | 10.31   | 7.52    | -0.49 | 4.77E-03 | 2.58E-01 |
| Sox11        | 0.76    | 0.13    | -2.53 | 4.80E-03 | 2.59E-01 |
| Plp1         | 2.17    | 1.30    | -0.78 | 4.85E-03 | 2.59E-01 |
| Gpr171       | 0.23    | 0.00    | -5.74 | 4.84E-03 | 2.59E-01 |
| Gm6563       | 29.24   | 42.06   | 0.49  | 4.85E-03 | 2.59E-01 |
| Chchd7       | 2.83    | 4.80    | 0.74  | 4.94E-03 | 2.62E-01 |
| Mdga1        | 4.20    | 2.31    | -0.91 | 4.95E-03 | 2.62E-01 |
| Cend1        | 164.68  | 125.34  | -0.43 | 4.96E-03 | 2.62E-01 |
| Mef2c        | 14.37   | 20.86   | 0.51  | 5.06E-03 | 2.63E-01 |
| Cpne6        | 68.84   | 54.81   | -0.36 | 5.07E-03 | 2.63E-01 |
| Msrb2        | 24.12   | 34.83   | 0.50  | 5.01E-03 | 2.63E-01 |
| Fam234b      | 14.26   | 10.46   | -0.48 | 5.12E-03 | 2.63E-01 |
| Cdk16        | 28.84   | 22.46   | -0.39 | 5.13E-03 | 2.63E-01 |
| Dph6         | 7.45    | 10.70   | 0.49  | 5.12E-03 | 2.63E-01 |
| mt-Nd4       | 143.59  | 98.35   | -0.57 | 5.02E-03 | 2.63E-01 |
| Gm10284      | 3.14    | 0.84    | -1.93 | 5.11E-03 | 2.63E-01 |
| NA           | 9.06    | 14.20   | 0.62  | 5.14E-03 | 2.63E-01 |
| Pabpc1l2a-ps | 19.14   | 10.32   | -0.93 | 5.16E-03 | 2.64E-01 |
| Uqcrb        | 137.76  | 182.89  | 0.38  | 5.19E-03 | 2.64E-01 |
| Gm6180       | 62.06   | 44.12   | -0.53 | 5.22E-03 | 2.65E-01 |
| Pld3         | 82.95   | 63.29   | -0.43 | 5.24E-03 | 2.65E-01 |
| Necab1       | 22.77   | 31.59   | 0.44  | 5.33E-03 | 2.69E-01 |
| Map3k15      | 14.24   | 19.28   | 0.41  | 5.42E-03 | 2.72E-01 |
| Ubc          | 154.72  | 117.70  | -0.42 | 5.46E-03 | 2.73E-01 |
| Ap4s1        | 60.83   | 84.98   | 0.45  | 5.48E-03 | 2.73E-01 |
| Ccl21a       | 13.08   | 6.82    | -0.98 | 5.48E-03 | 2.73E-01 |

|               |          |         |       |          |          |
|---------------|----------|---------|-------|----------|----------|
| Lxn           | 29.93    | 42.24   | 0.47  | 5.53E-03 | 2.74E-01 |
| Grm1          | 7.93     | 5.50    | -0.56 | 5.58E-03 | 2.75E-01 |
| Pde4a         | 20.07    | 15.13   | -0.44 | 5.57E-03 | 2.75E-01 |
| Vps72         | 2.21     | 1.20    | -0.92 | 5.75E-03 | 2.77E-01 |
| Rbfox2        | 23.65    | 18.19   | -0.42 | 5.68E-03 | 2.77E-01 |
| Fchsd1        | 7.05     | 5.20    | -0.47 | 5.73E-03 | 2.77E-01 |
| Ldlrad3       | 0.94     | 0.42    | -1.20 | 5.77E-03 | 2.77E-01 |
| Gm7536        | 188.25   | 249.47  | 0.37  | 5.79E-03 | 2.77E-01 |
| Rnf169        | 5.75     | 8.33    | 0.50  | 5.79E-03 | 2.77E-01 |
| Gm15564       | 552.14   | 220.12  | -1.37 | 5.76E-03 | 2.77E-01 |
| Gm25911       | 13793.09 | 9864.07 | -0.51 | 5.66E-03 | 2.77E-01 |
| 5830462119Rik | 2.37     | 1.36    | -0.83 | 5.77E-03 | 2.77E-01 |
| Ii17rd        | 0.46     | 0.15    | -1.61 | 5.81E-03 | 2.78E-01 |
| Gm10275       | 41.34    | 58.60   | 0.47  | 5.87E-03 | 2.79E-01 |
| Mef2d         | 46.04    | 33.69   | -0.49 | 5.89E-03 | 2.79E-01 |
| Cfap36        | 54.24    | 71.44   | 0.37  | 5.92E-03 | 2.79E-01 |
| Ddn           | 121.03   | 86.96   | -0.52 | 5.93E-03 | 2.79E-01 |
| Znrf3         | 3.88     | 2.74    | -0.53 | 6.00E-03 | 2.81E-01 |
| Gm13301       | 9.54     | 6.22    | -0.66 | 5.98E-03 | 2.81E-01 |
| Dynll1        | 427.84   | 535.85  | 0.29  | 6.11E-03 | 2.84E-01 |
| Urah          | 0.63     | 1.88    | 1.53  | 6.10E-03 | 2.84E-01 |
| Itga6         | 0.27     | 0.09    | -1.59 | 6.15E-03 | 2.85E-01 |
| Amy1          | 1.10     | 0.30    | -1.91 | 6.13E-03 | 2.85E-01 |
| Gm26560       | 2.28     | 0.94    | -1.32 | 6.22E-03 | 2.87E-01 |
| Eif3f         | 25.23    | 33.87   | 0.39  | 6.29E-03 | 2.90E-01 |
| Arl4d         | 0.79     | 2.63    | 1.70  | 6.40E-03 | 2.90E-01 |
| Abhd14b       | 2.98     | 1.38    | -1.14 | 6.36E-03 | 2.90E-01 |
| Gm6863        | 78.11    | 103.57  | 0.37  | 6.40E-03 | 2.90E-01 |
| Gm6851        | 27.15    | 41.74   | 0.59  | 6.39E-03 | 2.90E-01 |
| Wdr83os       | 84.74    | 60.00   | -0.54 | 6.35E-03 | 2.90E-01 |
| Gm960         | 0.38     | 0.08    | -2.23 | 6.41E-03 | 2.90E-01 |
| Btbd17        | 1.60     | 0.83    | -0.98 | 6.46E-03 | 2.91E-01 |
| Gm20499       | 46.00    | 26.26   | -0.84 | 6.56E-03 | 2.95E-01 |
| Ccdc97        | 9.05     | 5.88    | -0.66 | 6.65E-03 | 2.97E-01 |
| Ddx47         | 6.39     | 9.62    | 0.56  | 6.90E-03 | 2.97E-01 |
| Uqcrfs1       | 67.46    | 93.86   | 0.45  | 6.72E-03 | 2.97E-01 |
| Btaf1         | 1.54     | 2.53    | 0.68  | 6.85E-03 | 2.97E-01 |
| Dennd6a       | 9.05     | 6.66    | -0.48 | 6.92E-03 | 2.97E-01 |
| Hsd3b7        | 3.98     | 2.54    | -0.69 | 6.84E-03 | 2.97E-01 |
| Shld1         | 2.66     | 0.86    | -1.68 | 6.91E-03 | 2.97E-01 |
| Gprin3        | 3.99     | 2.20    | -0.90 | 6.82E-03 | 2.97E-01 |
| Atxn7l2       | 1.07     | 2.24    | 1.04  | 6.86E-03 | 2.97E-01 |
| Rpp38         | 13.98    | 7.51    | -0.93 | 6.88E-03 | 2.97E-01 |
| Vsnl1         | 5704.63  | 6837.99 | 0.23  | 6.75E-03 | 2.97E-01 |
| Gm17494       | 492.65   | 621.06  | 0.30  | 6.82E-03 | 2.97E-01 |
| Mrpl18        | 24.03    | 34.17   | 0.48  | 6.70E-03 | 2.97E-01 |
| Zfp993        | 5.58     | 2.69    | -1.09 | 6.74E-03 | 2.97E-01 |
| Rps6-ps4      | 219.95   | 288.64  | 0.36  | 6.83E-03 | 2.97E-01 |
| Gm17167       | 6.69     | 4.33    | -0.67 | 6.81E-03 | 2.97E-01 |
| Gm38393       | 438.05   | 356.33  | -0.33 | 6.96E-03 | 2.97E-01 |
| Pnpla1        | 0.15     | 0.01    | -3.89 | 6.95E-03 | 2.97E-01 |
| Tab1          | 2.64     | 1.34    | -1.02 | 7.06E-03 | 2.99E-01 |

|               |        |        |       |          |          |
|---------------|--------|--------|-------|----------|----------|
| Ly6h          | 3.79   | 2.29   | -0.77 | 7.09E-03 | 2.99E-01 |
| Prr5          | 0.52   | 0.08   | -2.78 | 7.13E-03 | 2.99E-01 |
| Kcnb1         | 14.02  | 8.81   | -0.71 | 7.04E-03 | 2.99E-01 |
| Gm12715       | 238.42 | 311.92 | 0.36  | 7.08E-03 | 2.99E-01 |
| Actg1         | 221.49 | 286.94 | 0.35  | 7.12E-03 | 2.99E-01 |
| Tiam2         | 2.70   | 4.13   | 0.58  | 7.20E-03 | 3.02E-01 |
| Med13l        | 8.99   | 6.57   | -0.49 | 7.31E-03 | 3.05E-01 |
| Rps20         | 19.72  | 26.38  | 0.39  | 7.34E-03 | 3.06E-01 |
| Capn15        | 1.48   | 0.56   | -1.47 | 7.36E-03 | 3.06E-01 |
| Tpmt          | 1.41   | 0.56   | -1.37 | 7.39E-03 | 3.06E-01 |
| Tk2           | 4.66   | 7.14   | 0.58  | 7.41E-03 | 3.06E-01 |
| Gm20498       | 22.90  | 30.36  | 0.37  | 7.47E-03 | 3.07E-01 |
| Ccl28         | 1.72   | 0.73   | -1.27 | 7.48E-03 | 3.07E-01 |
| Gm8172        | 98.95  | 133.24 | 0.40  | 7.47E-03 | 3.07E-01 |
| Ufc1          | 28.30  | 37.78  | 0.39  | 7.50E-03 | 3.07E-01 |
| Mark2         | 8.29   | 6.16   | -0.46 | 7.52E-03 | 3.07E-01 |
| Xlr3b         | 0.26   | 0.80   | 1.62  | 7.55E-03 | 3.07E-01 |
| Plxna4        | 20.15  | 15.66  | -0.40 | 7.59E-03 | 3.08E-01 |
| Gm1821        | 417.23 | 333.98 | -0.36 | 7.65E-03 | 3.09E-01 |
| Gm4995        | 41.97  | 61.35  | 0.52  | 7.65E-03 | 3.09E-01 |
| Gm14494       | 64.71  | 92.76  | 0.49  | 7.71E-03 | 3.10E-01 |
| Rpl23a        | 188.67 | 243.44 | 0.34  | 7.76E-03 | 3.11E-01 |
| Gm13302       | 5.90   | 3.62   | -0.74 | 7.78E-03 | 3.11E-01 |
| Afap1         | 2.21   | 1.17   | -0.97 | 7.84E-03 | 3.13E-01 |
| NA            | 15.67  | 9.62   | -0.74 | 7.85E-03 | 3.13E-01 |
| Prkn          | 2.34   | 0.53   | -2.18 | 7.95E-03 | 3.15E-01 |
| Sbf1          | 7.03   | 5.16   | -0.49 | 7.95E-03 | 3.15E-01 |
| Angel1        | 0.94   | 0.29   | -1.77 | 8.10E-03 | 3.18E-01 |
| Rassf3        | 1.52   | 2.78   | 0.84  | 8.08E-03 | 3.18E-01 |
| Slc5a2        | 1.71   | 0.75   | -1.23 | 8.08E-03 | 3.18E-01 |
| Ubb           | 331.69 | 269.93 | -0.33 | 8.17E-03 | 3.19E-01 |
| Rangrf        | 6.49   | 10.79  | 0.70  | 8.15E-03 | 3.19E-01 |
| Adam11        | 5.08   | 3.66   | -0.51 | 8.21E-03 | 3.20E-01 |
| Pxmp4         | 5.91   | 4.04   | -0.58 | 8.35E-03 | 3.21E-01 |
| Dyrk1b        | 3.06   | 1.78   | -0.81 | 8.35E-03 | 3.21E-01 |
| Lsm2          | 6.38   | 4.38   | -0.57 | 8.34E-03 | 3.21E-01 |
| Gm12918       | 164.52 | 213.47 | 0.34  | 8.33E-03 | 3.21E-01 |
| Htra2         | 4.40   | 2.77   | -0.70 | 8.28E-03 | 3.21E-01 |
| A330102110Rik | 1.56   | 0.60   | -1.43 | 8.28E-03 | 3.21E-01 |
| Rusc2         | 13.00  | 9.86   | -0.43 | 8.38E-03 | 3.21E-01 |
| Gm8213        | 69.48  | 94.95  | 0.42  | 8.40E-03 | 3.21E-01 |
| Smc5          | 3.25   | 4.77   | 0.52  | 8.47E-03 | 3.22E-01 |
| Ppp1r13l      | 0.59   | 0.14   | -2.14 | 8.46E-03 | 3.22E-01 |
| Thy1          | 391.08 | 299.70 | -0.42 | 8.49E-03 | 3.22E-01 |
| Gpr108        | 2.42   | 1.12   | -1.15 | 8.53E-03 | 3.23E-01 |
| Scrt2         | 6.10   | 3.93   | -0.67 | 8.55E-03 | 3.23E-01 |
| Shisa7        | 43.60  | 33.34  | -0.42 | 8.62E-03 | 3.25E-01 |
| Sema6a        | 1.58   | 0.97   | -0.75 | 8.70E-03 | 3.26E-01 |
| Ptms          | 69.88  | 44.40  | -0.70 | 8.70E-03 | 3.26E-01 |
| Iqsec2        | 16.74  | 11.75  | -0.55 | 8.72E-03 | 3.26E-01 |
| Dagla         | 16.84  | 12.81  | -0.43 | 8.77E-03 | 3.27E-01 |
| Slco2a1       | 2.02   | 1.10   | -0.92 | 8.84E-03 | 3.28E-01 |



|               |        |        |       |          |          |
|---------------|--------|--------|-------|----------|----------|
| NA            | 10.08  | 6.29   | -0.72 | 8.84E-03 | 3.28E-01 |
| Npcd          | 7.01   | 4.44   | -0.69 | 8.89E-03 | 3.29E-01 |
| Prkcg         | 413.79 | 331.70 | -0.36 | 8.91E-03 | 3.29E-01 |
| Adcy5         | 7.65   | 5.88   | -0.41 | 9.13E-03 | 3.31E-01 |
| Csmd2         | 1.45   | 0.93   | -0.68 | 9.14E-03 | 3.31E-01 |
| C2cd2l        | 16.77  | 13.19  | -0.38 | 9.10E-03 | 3.31E-01 |
| Zfp384        | 5.02   | 3.62   | -0.51 | 9.08E-03 | 3.31E-01 |
| Cc2d2a        | 1.55   | 2.51   | 0.67  | 9.14E-03 | 3.31E-01 |
| Rps6-ps1      | 78.25  | 106.22 | 0.41  | 9.01E-03 | 3.31E-01 |
| Nt5dc2        | 4.88   | 2.36   | -1.08 | 9.11E-03 | 3.31E-01 |
| Gm10704       | 22.20  | 32.11  | 0.50  | 9.05E-03 | 3.31E-01 |
| Cdr1          | 424.49 | 299.57 | -0.54 | 9.12E-03 | 3.31E-01 |
| Rpl13-ps3     | 111.91 | 145.80 | 0.35  | 9.19E-03 | 3.32E-01 |
| Tmem63b       | 13.29  | 10.31  | -0.40 | 9.30E-03 | 3.35E-01 |
| Lrrc4b        | 12.46  | 8.63   | -0.57 | 9.33E-03 | 3.35E-01 |
| Tedc2         | 1.58   | 3.03   | 0.90  | 9.40E-03 | 3.35E-01 |
| Arhgdia       | 81.39  | 65.05  | -0.36 | 9.42E-03 | 3.35E-01 |
| Rps6          | 148.43 | 191.34 | 0.34  | 9.41E-03 | 3.35E-01 |
| Tmem164       | 0.11   | 0.46   | 1.98  | 9.41E-03 | 3.35E-01 |
| Zfhx2         | 6.28   | 4.29   | -0.59 | 9.45E-03 | 3.35E-01 |
| Slc35c2       | 2.07   | 1.19   | -0.84 | 9.55E-03 | 3.38E-01 |
| Cybrd1        | 0.60   | 0.14   | -2.17 | 9.61E-03 | 3.38E-01 |
| Creb3l1       | 2.23   | 1.07   | -1.10 | 9.59E-03 | 3.38E-01 |
| Stard7        | 14.06  | 18.94  | 0.40  | 9.62E-03 | 3.38E-01 |
| Alg8          | 5.41   | 3.43   | -0.69 | 9.68E-03 | 3.39E-01 |
| Zfp991        | 2.85   | 1.60   | -0.87 | 9.67E-03 | 3.39E-01 |
| Ccdc159       | 0.51   | 1.61   | 1.63  | 9.79E-03 | 3.41E-01 |
| Erg28         | 8.54   | 6.32   | -0.47 | 9.76E-03 | 3.41E-01 |
| Crim1         | 21.62  | 16.52  | -0.43 | 9.79E-03 | 3.41E-01 |
| Ltb           | 1.44   | 0.03   | -5.66 | 9.89E-03 | 3.43E-01 |
| Capn5         | 10.76  | 8.21   | -0.42 | 9.97E-03 | 3.44E-01 |
| Hist1h2bk     | 10.61  | 5.52   | -0.98 | 9.95E-03 | 3.44E-01 |
| Ap1s1         | 14.55  | 10.57  | -0.50 | 1.01E-02 | 3.46E-01 |
| Yeats2        | 3.88   | 2.52   | -0.65 | 1.01E-02 | 3.46E-01 |
| Oaz1-ps       | 122.80 | 93.19  | -0.43 | 1.01E-02 | 3.46E-01 |
| Tpt1          | 178.33 | 227.27 | 0.32  | 1.01E-02 | 3.46E-01 |
| Per1          | 7.47   | 5.20   | -0.56 | 1.02E-02 | 3.46E-01 |
| Snap23        | 1.55   | 0.55   | -1.52 | 1.02E-02 | 3.46E-01 |
| Nova2         | 32.34  | 24.72  | -0.43 | 1.02E-02 | 3.46E-01 |
| 2310002F09Rik | 4.69   | 7.57   | 0.66  | 1.01E-02 | 3.46E-01 |
| Gm26811       | 6.24   | 4.63   | -0.46 | 1.02E-02 | 3.46E-01 |
| Cry1          | 1.93   | 3.30   | 0.74  | 1.03E-02 | 3.46E-01 |
| Mrps35        | 1.98   | 3.09   | 0.60  | 1.03E-02 | 3.46E-01 |
| Rpl23a-ps3    | 170.22 | 220.58 | 0.34  | 1.03E-02 | 3.46E-01 |
| Gm3362        | 147.39 | 192.68 | 0.36  | 1.03E-02 | 3.46E-01 |
| Zcwpw1        | 0.39   | 1.17   | 1.55  | 1.04E-02 | 3.48E-01 |
| Zfp141        | 5.08   | 7.37   | 0.51  | 1.04E-02 | 3.48E-01 |
| Rnasek        | 362.49 | 286.90 | -0.37 | 1.04E-02 | 3.48E-01 |
| Smo           | 2.24   | 0.98   | -1.22 | 1.05E-02 | 3.48E-01 |
| Ccna2         | 5.34   | 7.73   | 0.50  | 1.05E-02 | 3.48E-01 |
| B3gat3        | 8.28   | 5.10   | -0.74 | 1.05E-02 | 3.48E-01 |
| Olf31         | 0.11   | 1.00   | 3.13  | 1.06E-02 | 3.48E-01 |

|               |          |         |       |          |          |
|---------------|----------|---------|-------|----------|----------|
| Gm16581       | 13.72    | 9.02    | -0.64 | 1.05E-02 | 3.48E-01 |
| Ankrd52       | 8.29     | 6.36    | -0.42 | 1.06E-02 | 3.49E-01 |
| Ncdn          | 121.29   | 96.31   | -0.37 | 1.08E-02 | 3.52E-01 |
| Ppp1r9b       | 39.99    | 30.79   | -0.41 | 1.08E-02 | 3.52E-01 |
| Serpina3f     | 0.31     | 0.02    | -3.78 | 1.08E-02 | 3.52E-01 |
| Mir686        | 25.24    | 11.22   | -1.21 | 1.08E-02 | 3.52E-01 |
| Gm16278       | 4.35     | 2.47    | -0.84 | 1.08E-02 | 3.52E-01 |
| Tppp3         | 3.24     | 1.79    | -0.88 | 1.09E-02 | 3.53E-01 |
| Vit           | 1.10     | 2.35    | 1.06  | 1.09E-02 | 3.53E-01 |
| Al593442      | 127.08   | 104.11  | -0.32 | 1.09E-02 | 3.53E-01 |
| Gm42418       | 11789.22 | 7128.49 | -0.77 | 1.10E-02 | 3.55E-01 |
| Ptbp1         | 0.79     | 0.39    | -1.07 | 1.10E-02 | 3.55E-01 |
| Pip4k2b       | 27.23    | 21.95   | -0.35 | 1.11E-02 | 3.55E-01 |
| Hpcal4        | 242.85   | 207.01  | -0.26 | 1.11E-02 | 3.55E-01 |
| Sox12         | 3.13     | 1.22    | -1.42 | 1.11E-02 | 3.55E-01 |
| Gas5          | 23.64    | 30.85   | 0.35  | 1.11E-02 | 3.55E-01 |
| D630044L22Rik | 1.24     | 0.46    | -1.49 | 1.11E-02 | 3.55E-01 |
| Sdf2l1        | 7.06     | 3.39    | -1.10 | 1.12E-02 | 3.55E-01 |
| Igsf8         | 16.39    | 13.11   | -0.36 | 1.13E-02 | 3.57E-01 |
| Syngap1       | 82.04    | 60.94   | -0.47 | 1.13E-02 | 3.57E-01 |
| Camk2a        | 1000.71  | 825.02  | -0.32 | 1.14E-02 | 3.58E-01 |
| Coprs         | 16.29    | 24.12   | 0.53  | 1.14E-02 | 3.58E-01 |
| 1110002L01Rik | 13.32    | 17.43   | 0.36  | 1.14E-02 | 3.58E-01 |
| 3110070M22Rik | 1.30     | 0.15    | -3.15 | 1.14E-02 | 3.58E-01 |
| Pabpc5        | 2.54     | 1.15    | -1.19 | 1.14E-02 | 3.59E-01 |
| Preb          | 21.13    | 5.73    | -1.96 | 1.15E-02 | 3.59E-01 |
| Gm6682        | 232.57   | 181.43  | -0.39 | 1.17E-02 | 3.64E-01 |
| Cbx6          | 13.71    | 10.87   | -0.37 | 1.17E-02 | 3.64E-01 |
| Rps13         | 243.73   | 311.99  | 0.32  | 1.18E-02 | 3.66E-01 |
| Hars          | 30.90    | 40.19   | 0.35  | 1.19E-02 | 3.67E-01 |
| Rnaseh1       | 2.26     | 4.27    | 0.88  | 1.19E-02 | 3.67E-01 |
| Psmg2         | 10.05    | 15.92   | 0.64  | 1.18E-02 | 3.67E-01 |
| Etfa          | 14.26    | 21.22   | 0.54  | 1.19E-02 | 3.67E-01 |
| 2310058D17Rik | 0.28     | 0.91    | 1.68  | 1.18E-02 | 3.67E-01 |
| 1500002C15Rik | 22.33    | 29.60   | 0.37  | 1.20E-02 | 3.70E-01 |
| Gm21988       | 202.76   | 161.47  | -0.36 | 1.21E-02 | 3.71E-01 |
| Gm10600       | 7.12     | 4.29    | -0.77 | 1.22E-02 | 3.72E-01 |
| Nova1         | 8.93     | 11.88   | 0.38  | 1.23E-02 | 3.73E-01 |
| Mast3         | 71.17    | 55.21   | -0.40 | 1.22E-02 | 3.73E-01 |
| Dctn1         | 10.08    | 7.98    | -0.37 | 1.23E-02 | 3.73E-01 |
| Ccdc106       | 2.98     | 1.54    | -0.99 | 1.22E-02 | 3.73E-01 |
| Ppia          | 468.11   | 571.98  | 0.26  | 1.23E-02 | 3.73E-01 |
| H3f3a-ps2     | 43.34    | 30.43   | -0.54 | 1.23E-02 | 3.73E-01 |
| A530032D15Rik | 2.24     | 1.08    | -1.09 | 1.23E-02 | 3.73E-01 |
| Csnk1g2       | 10.76    | 7.88    | -0.48 | 1.25E-02 | 3.73E-01 |
| Pacs2         | 7.62     | 5.76    | -0.44 | 1.25E-02 | 3.73E-01 |
| Caly          | 30.87    | 23.30   | -0.44 | 1.24E-02 | 3.73E-01 |
| Atp1a1        | 32.07    | 26.07   | -0.33 | 1.25E-02 | 3.73E-01 |
| Blvrb         | 1.46     | 0.51    | -1.57 | 1.24E-02 | 3.73E-01 |
| Zfp592        | 4.34     | 2.98    | -0.58 | 1.30E-02 | 3.73E-01 |
| Atxn10        | 112.07   | 142.46  | 0.32  | 1.29E-02 | 3.73E-01 |
| Agap2         | 45.48    | 35.38   | -0.40 | 1.30E-02 | 3.73E-01 |

|               |          |          |       |          |          |
|---------------|----------|----------|-------|----------|----------|
| Eif4e2        | 5.27     | 3.73     | -0.54 | 1.25E-02 | 3.73E-01 |
| Fam110a       | 0.97     | 0.41     | -1.27 | 1.28E-02 | 3.73E-01 |
| Toe1          | 1.46     | 2.61     | 0.81  | 1.29E-02 | 3.73E-01 |
| Cnbp          | 153.01   | 199.17   | 0.35  | 1.27E-02 | 3.73E-01 |
| Mzf1          | 0.70     | 0.30     | -1.24 | 1.30E-02 | 3.73E-01 |
| Dcun1d5       | 42.16    | 57.15    | 0.41  | 1.27E-02 | 3.73E-01 |
| Tstd2         | 3.22     | 4.57     | 0.47  | 1.26E-02 | 3.73E-01 |
| Megf11        | 5.15     | 6.98     | 0.41  | 1.30E-02 | 3.73E-01 |
| Sema6c        | 0.52     | 0.17     | -1.69 | 1.26E-02 | 3.73E-01 |
| Ap5z1         | 1.49     | 0.79     | -0.94 | 1.29E-02 | 3.73E-01 |
| Cdk6          | 0.28     | 0.05     | -2.61 | 1.26E-02 | 3.73E-01 |
| Cdc42ep4      | 1.79     | 1.01     | -0.86 | 1.28E-02 | 3.73E-01 |
| Wscd2         | 3.07     | 2.34     | -0.43 | 1.25E-02 | 3.73E-01 |
| Gm24270       | 36757.47 | 27302.25 | -0.46 | 1.30E-02 | 3.73E-01 |
| Ighm          | 27.14    | 14.95    | -0.90 | 1.29E-02 | 3.73E-01 |
| Pisd-ps1      | 4.38     | 2.28     | -0.98 | 1.28E-02 | 3.73E-01 |
| Gm13296       | 171.28   | 101.02   | -0.80 | 1.30E-02 | 3.73E-01 |
| A330023F24Rik | 0.09     | 0.26     | 1.45  | 1.29E-02 | 3.73E-01 |
| Gm26794       | 12.07    | 8.91     | -0.47 | 1.27E-02 | 3.73E-01 |
| Sf3a2         | 3.84     | 2.01     | -0.98 | 1.31E-02 | 3.74E-01 |
| Ciz1          | 5.85     | 4.16     | -0.53 | 1.31E-02 | 3.74E-01 |
| Anks3         | 2.54     | 1.44     | -0.85 | 1.32E-02 | 3.74E-01 |
| Prss23os      | 0.28     | 1.56     | 2.50  | 1.31E-02 | 3.74E-01 |
| Cfap58        | 0.20     | 0.64     | 1.65  | 1.32E-02 | 3.74E-01 |
| Nol7          | 32.05    | 41.89    | 0.35  | 1.32E-02 | 3.74E-01 |
| Psm12         | 29.26    | 38.68    | 0.37  | 1.33E-02 | 3.75E-01 |
| Dgkz          | 53.76    | 38.42    | -0.53 | 1.33E-02 | 3.75E-01 |
| Zmiz2         | 26.51    | 19.38    | -0.49 | 1.33E-02 | 3.75E-01 |
| Smim26        | 65.09    | 87.36    | 0.39  | 1.33E-02 | 3.75E-01 |
| Twsg1         | 8.87     | 6.68     | -0.44 | 1.35E-02 | 3.75E-01 |
| Adgrb2        | 7.77     | 5.57     | -0.52 | 1.35E-02 | 3.75E-01 |
| Lrrtm1        | 28.49    | 22.14    | -0.40 | 1.34E-02 | 3.75E-01 |
| Vps25         | 19.82    | 14.33    | -0.50 | 1.34E-02 | 3.75E-01 |
| Plcx2         | 4.93     | 7.39     | 0.56  | 1.35E-02 | 3.75E-01 |
| Mlec          | 13.45    | 10.30    | -0.42 | 1.35E-02 | 3.76E-01 |
| Gm17168       | 118.80   | 83.90    | -0.54 | 1.35E-02 | 3.76E-01 |
| Hadha         | 2.85     | 1.90     | -0.62 | 1.36E-02 | 3.78E-01 |
| Cox17         | 7.38     | 9.69     | 0.36  | 1.36E-02 | 3.78E-01 |
| Por           | 10.27    | 7.68     | -0.45 | 1.37E-02 | 3.78E-01 |
| Chkb          | 1.16     | 0.64     | -0.89 | 1.38E-02 | 3.78E-01 |
| Pcna          | 23.43    | 30.82    | 0.36  | 1.37E-02 | 3.78E-01 |
| Gm7353        | 2.32     | 1.18     | -1.03 | 1.37E-02 | 3.78E-01 |
| NA            | 29.55    | 23.54    | -0.36 | 1.38E-02 | 3.78E-01 |
| Atp5g3        | 292.22   | 362.12   | 0.28  | 1.38E-02 | 3.78E-01 |
| Tmem59l       | 43.17    | 32.17    | -0.46 | 1.39E-02 | 3.80E-01 |
| Rpa3          | 9.61     | 18.40    | 0.89  | 1.41E-02 | 3.81E-01 |
| Id2           | 22.09    | 30.63    | 0.44  | 1.40E-02 | 3.81E-01 |
| Zbtb1         | 1.60     | 2.27     | 0.48  | 1.41E-02 | 3.81E-01 |
| R3hdm4        | 238.90   | 185.14   | -0.41 | 1.40E-02 | 3.81E-01 |
| Rps13-ps2     | 107.11   | 140.53   | 0.36  | 1.41E-02 | 3.81E-01 |
| BC024978      | 16.62    | 12.69    | -0.43 | 1.40E-02 | 3.81E-01 |
| Gm14044       | 81.44    | 109.09   | 0.39  | 1.42E-02 | 3.83E-01 |

|               |       |        |        |       |          |          |
|---------------|-------|--------|--------|-------|----------|----------|
| Acsl1         |       | 3.56   | 2.69   | -0.44 | 1.42E-02 | 3.84E-01 |
| Tob1          |       | 19.97  | 15.72  | -0.38 | 1.44E-02 | 3.86E-01 |
| Myo16         |       | 3.06   | 2.06   | -0.61 | 1.45E-02 | 3.86E-01 |
| Micu3         |       | 40.40  | 51.84  | 0.33  | 1.44E-02 | 3.86E-01 |
| Rapgef1       |       | 6.42   | 4.87   | -0.43 | 1.45E-02 | 3.86E-01 |
| Zfp438        |       | 2.51   | 1.35   | -0.94 | 1.45E-02 | 3.86E-01 |
| E030024N2ORik |       | 134.37 | 174.40 | 0.35  | 1.44E-02 | 3.86E-01 |
| Tyw5          |       | 10.77  | 14.49  | 0.40  | 1.45E-02 | 3.87E-01 |
| Gm13623       |       | 39.86  | 54.43  | 0.42  | 1.46E-02 | 3.88E-01 |
| Rpl9-ps4      |       | 60.52  | 81.29  | 0.40  | 1.46E-02 | 3.88E-01 |
| Nptxr         |       | 84.55  | 70.20  | -0.30 | 1.46E-02 | 3.88E-01 |
| Slc44a5       |       | 3.26   | 2.26   | -0.56 | 1.47E-02 | 3.90E-01 |
| Stk32c        |       | 3.10   | 1.36   | -1.25 | 1.49E-02 | 3.91E-01 |
|               | 3-Sep | 167.70 | 138.61 | -0.31 | 1.49E-02 | 3.91E-01 |
| Sdhaf2        |       | 14.27  | 18.57  | 0.35  | 1.49E-02 | 3.91E-01 |
| Slc15a3       |       | 0.74   | 0.39   | -0.97 | 1.50E-02 | 3.91E-01 |
| Pfn2          |       | 163.78 | 203.88 | 0.28  | 1.48E-02 | 3.91E-01 |
| Rcor3         |       | 8.69   | 6.49   | -0.45 | 1.50E-02 | 3.91E-01 |
| Clip2         |       | 3.85   | 2.47   | -0.69 | 1.50E-02 | 3.91E-01 |
| 1190007107Rik |       | 7.77   | 12.47  | 0.65  | 1.49E-02 | 3.91E-01 |
| Arfgef2       |       | 5.00   | 3.69   | -0.47 | 1.49E-02 | 3.91E-01 |
| Kcnn3         |       | 1.91   | 1.05   | -0.89 | 1.56E-02 | 3.91E-01 |
| Ramp2         |       | 15.68  | 12.07  | -0.41 | 1.55E-02 | 3.91E-01 |
| Gmpr2         |       | 3.78   | 6.42   | 0.74  | 1.55E-02 | 3.91E-01 |
| Prkd1         |       | 0.43   | 1.03   | 1.24  | 1.58E-02 | 3.91E-01 |
| Hmox1         |       | 1.93   | 1.00   | -0.99 | 1.51E-02 | 3.91E-01 |
| Mpped2        |       | 18.64  | 25.75  | 0.44  | 1.65E-02 | 3.91E-01 |
| Mccc2         |       | 2.14   | 4.01   | 0.87  | 1.57E-02 | 3.91E-01 |
| Ifngr2        |       | 27.79  | 22.52  | -0.34 | 1.63E-02 | 3.91E-01 |
| Ptk7          |       | 0.19   | 0.02   | -3.09 | 1.62E-02 | 3.91E-01 |
| Syt7          |       | 17.10  | 13.49  | -0.38 | 1.53E-02 | 3.91E-01 |
| Adpgk         |       | 0.79   | 1.65   | 1.04  | 1.65E-02 | 3.91E-01 |
| Baiap2        |       | 32.23  | 25.60  | -0.37 | 1.54E-02 | 3.91E-01 |
| Mbd6          |       | 1.32   | 0.71   | -0.94 | 1.62E-02 | 3.91E-01 |
| Usf1          |       | 3.04   | 1.68   | -0.90 | 1.60E-02 | 3.91E-01 |
| Tspan18       |       | 7.10   | 4.29   | -0.75 | 1.60E-02 | 3.91E-01 |
| Psm7          |       | 29.36  | 37.91  | 0.34  | 1.64E-02 | 3.91E-01 |
| Rchy1         |       | 16.57  | 22.03  | 0.38  | 1.61E-02 | 3.91E-01 |
| Ajm1          |       | 9.10   | 6.69   | -0.48 | 1.63E-02 | 3.91E-01 |
| Auts2         |       | 7.16   | 5.36   | -0.45 | 1.59E-02 | 3.91E-01 |
| Plxna1        |       | 13.56  | 10.15  | -0.46 | 1.54E-02 | 3.91E-01 |
| Sipa1l3       |       | 12.81  | 9.66   | -0.45 | 1.57E-02 | 3.91E-01 |
| Nox1          |       | 1.08   | 1.95   | 0.82  | 1.56E-02 | 3.91E-01 |
| Mak16         |       | 12.06  | 17.77  | 0.53  | 1.54E-02 | 3.91E-01 |
| Scrg1         |       | 2.25   | 5.14   | 1.16  | 1.60E-02 | 3.91E-01 |
| Cfap20        |       | 21.51  | 31.82  | 0.54  | 1.53E-02 | 3.91E-01 |
| Cd59a         |       | 3.64   | 1.63   | -1.20 | 1.51E-02 | 3.91E-01 |
| Hid1          |       | 19.81  | 15.66  | -0.37 | 1.62E-02 | 3.91E-01 |
| Cacna1a       |       | 8.78   | 6.86   | -0.39 | 1.62E-02 | 3.91E-01 |
| Ror1          |       | 0.82   | 0.39   | -1.11 | 1.64E-02 | 3.91E-01 |
| Cbarp         |       | 30.50  | 24.37  | -0.36 | 1.56E-02 | 3.91E-01 |
| Tmem255a      |       | 19.39  | 14.87  | -0.42 | 1.64E-02 | 3.91E-01 |

|           |        |        |       |          |          |
|-----------|--------|--------|-------|----------|----------|
| Fbxw17    | 1.07   | 0.53   | -1.05 | 1.51E-02 | 3.91E-01 |
| Pak1ip1   | 8.51   | 11.44  | 0.39  | 1.63E-02 | 3.91E-01 |
| Bud31     | 22.27  | 30.93  | 0.44  | 1.56E-02 | 3.91E-01 |
| Zfp653    | 3.61   | 2.07   | -0.84 | 1.52E-02 | 3.91E-01 |
| Pcdhb12   | 1.27   | 0.62   | -1.05 | 1.58E-02 | 3.91E-01 |
| Rel2      | 12.18  | 9.31   | -0.42 | 1.64E-02 | 3.91E-01 |
| Zc3hav1l  | 5.81   | 3.98   | -0.58 | 1.50E-02 | 3.91E-01 |
| Slc39a9   | 4.96   | 3.68   | -0.46 | 1.63E-02 | 3.91E-01 |
| Gm7984    | 25.92  | 16.02  | -0.73 | 1.65E-02 | 3.91E-01 |
| Ccdc96    | 0.33   | 0.80   | 1.23  | 1.58E-02 | 3.91E-01 |
| Pfdn4     | 14.88  | 19.77  | 0.38  | 1.53E-02 | 3.91E-01 |
| D10Jhu81e | 12.78  | 19.01  | 0.55  | 1.60E-02 | 3.91E-01 |
| Hist3h2ba | 5.96   | 2.87   | -1.08 | 1.56E-02 | 3.91E-01 |
| Tubb2a    | 238.10 | 294.90 | 0.28  | 1.54E-02 | 3.91E-01 |
| Zfp932    | 6.43   | 9.03   | 0.46  | 1.58E-02 | 3.91E-01 |
| Fjx1      | 7.02   | 4.75   | -0.60 | 1.62E-02 | 3.91E-01 |
| Zc3h3     | 2.83   | 1.46   | -1.00 | 1.59E-02 | 3.91E-01 |
| NA        | 11.07  | 7.75   | -0.55 | 1.53E-02 | 3.91E-01 |
| Gm11149   | 14.72  | 10.57  | -0.51 | 1.64E-02 | 3.91E-01 |
| Gm7206    | 63.62  | 88.46  | 0.45  | 1.52E-02 | 3.91E-01 |
| Gm13610   | 14.22  | 9.46   | -0.62 | 1.61E-02 | 3.91E-01 |
| Neat1     | 0.11   | 0.02   | -2.51 | 1.63E-02 | 3.91E-01 |
| Gm20659   | 89.60  | 116.93 | 0.35  | 1.62E-02 | 3.91E-01 |
| Gm20683   | 6.67   | 4.51   | -0.60 | 1.60E-02 | 3.91E-01 |
| Gm26770   | 1.80   | 3.13   | 0.76  | 1.58E-02 | 3.91E-01 |
| Gm26702   | 9.31   | 6.84   | -0.48 | 1.64E-02 | 3.91E-01 |
| Dad1      | 15.94  | 12.43  | -0.39 | 1.66E-02 | 3.91E-01 |
| Mkks      | 10.95  | 8.38   | -0.42 | 1.65E-02 | 3.91E-01 |
| Higd1a    | 85.95  | 112.97 | 0.36  | 1.66E-02 | 3.91E-01 |
| Tubb4a    | 612.30 | 525.33 | -0.26 | 1.65E-02 | 3.91E-01 |
| Rps13-ps4 | 94.84  | 124.10 | 0.36  | 1.66E-02 | 3.91E-01 |
| Hltf      | 0.93   | 1.82   | 0.93  | 1.67E-02 | 3.91E-01 |
| Pex7      | 10.98  | 15.16  | 0.43  | 1.67E-02 | 3.91E-01 |
| Alg11     | 24.39  | 18.63  | -0.42 | 1.66E-02 | 3.91E-01 |
| Zgpat     | 1.36   | 0.76   | -0.89 | 1.68E-02 | 3.94E-01 |
| Snapc1    | 7.69   | 11.53  | 0.56  | 1.69E-02 | 3.94E-01 |
| Anxa5     | 1.37   | 2.68   | 0.93  | 1.69E-02 | 3.94E-01 |
| Mdh1      | 249.53 | 307.43 | 0.27  | 1.69E-02 | 3.95E-01 |
| Jmjd8     | 16.29  | 12.51  | -0.42 | 1.70E-02 | 3.95E-01 |
| Tomm6os   | 11.40  | 8.10   | -0.53 | 1.70E-02 | 3.95E-01 |
| Lgmn      | 5.61   | 8.29   | 0.53  | 1.71E-02 | 3.95E-01 |
| Wls       | 1.15   | 0.57   | -1.04 | 1.71E-02 | 3.95E-01 |
| Rfc1      | 3.52   | 2.29   | -0.66 | 1.73E-02 | 4.00E-01 |
| Kin       | 5.00   | 8.71   | 0.78  | 1.73E-02 | 4.00E-01 |
| Cox14     | 87.55  | 117.96 | 0.40  | 1.74E-02 | 4.00E-01 |
| Thyn1     | 57.26  | 75.93  | 0.37  | 1.74E-02 | 4.00E-01 |
| Krcc1     | 4.20   | 8.55   | 1.00  | 1.74E-02 | 4.00E-01 |
| Gimp      | 2.51   | 1.65   | -0.64 | 1.77E-02 | 4.01E-01 |
| Cpt1c     | 7.56   | 5.46   | -0.50 | 1.77E-02 | 4.01E-01 |
| Ppa1      | 34.23  | 43.34  | 0.31  | 1.77E-02 | 4.01E-01 |
| Hcn2      | 1.13   | 0.53   | -1.14 | 1.76E-02 | 4.01E-01 |
| Tbc1d9    | 6.53   | 8.66   | 0.38  | 1.76E-02 | 4.01E-01 |

|               |        |        |       |          |          |
|---------------|--------|--------|-------|----------|----------|
| Afg3l1        | 2.42   | 0.52   | -2.27 | 1.75E-02 | 4.01E-01 |
| Gm49322       | 4.54   | 3.22   | -0.53 | 1.78E-02 | 4.01E-01 |
| Erf           | 4.35   | 2.29   | -0.97 | 1.78E-02 | 4.01E-01 |
| Pnma3         | 3.31   | 2.11   | -0.69 | 1.76E-02 | 4.01E-01 |
| Pcdh19        | 15.68  | 12.67  | -0.34 | 1.77E-02 | 4.01E-01 |
| Trim65        | 0.93   | 0.47   | -1.04 | 1.78E-02 | 4.01E-01 |
| Cbx3-ps7      | 88.40  | 117.22 | 0.38  | 1.77E-02 | 4.01E-01 |
| Htatsf1       | 22.71  | 29.33  | 0.34  | 1.75E-02 | 4.01E-01 |
| Ndufb6        | 161.14 | 208.82 | 0.34  | 1.78E-02 | 4.01E-01 |
| Vps39         | 6.35   | 5.09   | -0.35 | 1.78E-02 | 4.01E-01 |
| Atp5g1        | 32.99  | 27.21  | -0.31 | 1.79E-02 | 4.02E-01 |
| Topbp1        | 3.91   | 5.63   | 0.50  | 1.80E-02 | 4.02E-01 |
| Gm3892        | 9.78   | 7.07   | -0.51 | 1.80E-02 | 4.02E-01 |
| Tmem160       | 8.66   | 4.92   | -0.86 | 1.81E-02 | 4.04E-01 |
| Nup98         | 5.34   | 3.42   | -0.68 | 1.81E-02 | 4.04E-01 |
| Prpf40b       | 2.35   | 1.54   | -0.64 | 1.82E-02 | 4.04E-01 |
| Rps24         | 164.07 | 208.88 | 0.32  | 1.85E-02 | 4.04E-01 |
| Brdt          | 4.11   | 6.11   | 0.54  | 1.85E-02 | 4.04E-01 |
| Gabarapl2     | 55.69  | 70.04  | 0.30  | 1.85E-02 | 4.04E-01 |
| Igsf9b        | 0.82   | 0.37   | -1.18 | 1.84E-02 | 4.04E-01 |
| Zic4          | 0.08   | 0.01   | -3.34 | 1.85E-02 | 4.04E-01 |
| Sstr4         | 26.60  | 18.48  | -0.57 | 1.83E-02 | 4.04E-01 |
| Nup88         | 3.78   | 5.31   | 0.46  | 1.84E-02 | 4.04E-01 |
| Atf4          | 56.83  | 71.72  | 0.30  | 1.86E-02 | 4.04E-01 |
| Bex2          | 277.41 | 226.55 | -0.33 | 1.81E-02 | 4.04E-01 |
| Rtn4rl1       | 50.35  | 41.35  | -0.32 | 1.82E-02 | 4.04E-01 |
| Rpl9          | 35.98  | 45.64  | 0.31  | 1.84E-02 | 4.04E-01 |
| Fam174a       | 21.50  | 29.06  | 0.40  | 1.85E-02 | 4.04E-01 |
| Cbx3-ps6      | 146.03 | 194.16 | 0.38  | 1.85E-02 | 4.04E-01 |
| 9230009102Rik | 0.30   | 1.57   | 2.40  | 1.83E-02 | 4.04E-01 |
| Gm13768       | 12.98  | 8.59   | -0.63 | 1.82E-02 | 4.04E-01 |
| Gm20518       | 3.14   | 2.06   | -0.65 | 1.84E-02 | 4.04E-01 |
| Gm10593       | 9.60   | 6.96   | -0.50 | 1.82E-02 | 4.04E-01 |
| Elavl3        | 34.82  | 25.77  | -0.47 | 1.87E-02 | 4.05E-01 |
| Nifk          | 20.71  | 28.78  | 0.45  | 1.87E-02 | 4.05E-01 |
| Gm2163        | 8.99   | 6.13   | -0.59 | 1.87E-02 | 4.05E-01 |
| Actr1b        | 45.85  | 37.70  | -0.32 | 1.88E-02 | 4.07E-01 |
| Fam166a       | 54.34  | 71.15  | 0.36  | 1.89E-02 | 4.07E-01 |
| Lrguk         | 0.95   | 0.48   | -1.00 | 1.89E-02 | 4.07E-01 |
| Adam15        | 4.59   | 3.15   | -0.58 | 1.89E-02 | 4.08E-01 |
| Gm20900       | 111.36 | 143.59 | 0.34  | 1.90E-02 | 4.09E-01 |
| Chd3          | 27.28  | 22.14  | -0.34 | 1.92E-02 | 4.11E-01 |
| Faim2         | 54.62  | 43.84  | -0.35 | 1.91E-02 | 4.11E-01 |
| Nlgn3         | 29.17  | 23.08  | -0.38 | 1.93E-02 | 4.14E-01 |
| Gm15464       | 71.94  | 96.30  | 0.39  | 1.93E-02 | 4.14E-01 |
| Kif1a         | 85.28  | 73.19  | -0.25 | 1.94E-02 | 4.15E-01 |
| Ovol2         | 0.47   | 1.38   | 1.52  | 1.95E-02 | 4.15E-01 |
| Dstyk         | 8.26   | 6.57   | -0.36 | 1.95E-02 | 4.15E-01 |
| Agtr1a        | 0.17   | 0.66   | 1.95  | 1.95E-02 | 4.15E-01 |
| Ensa          | 265.98 | 334.65 | 0.30  | 1.96E-02 | 4.16E-01 |
| Zfp532        | 4.19   | 3.24   | -0.40 | 1.96E-02 | 4.16E-01 |
| Cetn3         | 123.82 | 157.73 | 0.32  | 1.99E-02 | 4.18E-01 |

|               |        |        |       |          |          |
|---------------|--------|--------|-------|----------|----------|
| Mrps30        | 9.73   | 14.11  | 0.51  | 1.98E-02 | 4.18E-01 |
| Cbx3          | 78.21  | 103.39 | 0.37  | 1.99E-02 | 4.18E-01 |
| Creld1        | 3.87   | 2.61   | -0.61 | 1.97E-02 | 4.18E-01 |
| Sh2b1         | 5.79   | 3.81   | -0.64 | 2.01E-02 | 4.18E-01 |
| Rtn4r         | 22.38  | 16.93  | -0.44 | 2.00E-02 | 4.18E-01 |
| 2810002D19Rik | 1.24   | 2.95   | 1.24  | 1.99E-02 | 4.18E-01 |
| Shisa6        | 101.27 | 84.15  | -0.30 | 2.00E-02 | 4.18E-01 |
| Cdh24         | 0.54   | 0.17   | -1.68 | 1.98E-02 | 4.18E-01 |
| Numb1         | 4.78   | 3.48   | -0.50 | 2.01E-02 | 4.18E-01 |
| Gm11196       | 27.21  | 40.11  | 0.53  | 1.99E-02 | 4.18E-01 |
| Gm8624        | 30.08  | 41.59  | 0.44  | 1.98E-02 | 4.18E-01 |
| Gm15710       | 105.86 | 135.14 | 0.32  | 1.99E-02 | 4.18E-01 |
| Tpt1-ps3      | 280.29 | 355.33 | 0.31  | 2.00E-02 | 4.18E-01 |
| Kitl          | 0.95   | 1.73   | 0.84  | 2.01E-02 | 4.18E-01 |
| Nemf          | 14.78  | 20.02  | 0.41  | 2.02E-02 | 4.19E-01 |
| Gm13215       | 23.48  | 35.20  | 0.56  | 2.02E-02 | 4.19E-01 |
| Natd1         | 3.66   | 2.16   | -0.80 | 2.05E-02 | 4.21E-01 |
| Bsg           | 62.33  | 48.35  | -0.40 | 2.04E-02 | 4.21E-01 |
| Pcgf5         | 4.04   | 6.44   | 0.64  | 2.03E-02 | 4.21E-01 |
| Tjp2          | 0.57   | 0.21   | -1.46 | 2.05E-02 | 4.21E-01 |
| Cops4         | 16.11  | 21.05  | 0.35  | 2.05E-02 | 4.21E-01 |
| Naif1         | 0.83   | 1.49   | 0.80  | 2.05E-02 | 4.21E-01 |
| Sgms1         | 3.19   | 2.43   | -0.43 | 2.04E-02 | 4.21E-01 |
| Rnf7          | 98.50  | 125.53 | 0.32  | 2.04E-02 | 4.21E-01 |
| Cebpb         | 3.85   | 6.96   | 0.82  | 2.05E-02 | 4.21E-01 |
| Iglon5        | 3.00   | 1.82   | -0.76 | 2.06E-02 | 4.21E-01 |
| Rpl9-ps6      | 55.96  | 73.92  | 0.37  | 2.06E-02 | 4.21E-01 |
| Gm21958       | 4.87   | 2.39   | -1.06 | 2.06E-02 | 4.21E-01 |
| Mrps12        | 35.51  | 46.05  | 0.34  | 2.07E-02 | 4.22E-01 |
| B4galnt1      | 35.79  | 28.18  | -0.38 | 2.08E-02 | 4.22E-01 |
| Hdac5         | 7.08   | 5.24   | -0.47 | 2.09E-02 | 4.22E-01 |
| Lta4h         | 4.24   | 6.90   | 0.68  | 2.09E-02 | 4.22E-01 |
| Smarcd3       | 6.14   | 4.54   | -0.47 | 2.08E-02 | 4.22E-01 |
| Gm26995       | 1.89   | 0.82   | -1.24 | 2.08E-02 | 4.22E-01 |
| Pp2d1         | 4.88   | 7.34   | 0.56  | 2.09E-02 | 4.23E-01 |
| Nap1l5        | 72.64  | 93.77  | 0.34  | 2.09E-02 | 4.23E-01 |
| Gm11185       | 3.36   | 1.37   | -1.32 | 2.10E-02 | 4.23E-01 |
| Klc2          | 26.41  | 19.55  | -0.47 | 2.12E-02 | 4.24E-01 |
| Cnih2         | 100.95 | 75.34  | -0.46 | 2.13E-02 | 4.24E-01 |
| Abca2         | 5.47   | 4.33   | -0.37 | 2.13E-02 | 4.24E-01 |
| Smim27        | 74.77  | 97.60  | 0.35  | 2.12E-02 | 4.24E-01 |
| Nos1          | 11.62  | 8.98   | -0.41 | 2.13E-02 | 4.24E-01 |
| Zcchc7        | 1.26   | 1.92   | 0.58  | 2.13E-02 | 4.24E-01 |
| Scaf1         | 3.51   | 2.40   | -0.59 | 2.13E-02 | 4.24E-01 |
| Mrps27        | 9.04   | 6.49   | -0.51 | 2.13E-02 | 4.24E-01 |
| Swsap1        | 5.44   | 3.38   | -0.72 | 2.12E-02 | 4.24E-01 |
| Camk2b        | 82.38  | 70.78  | -0.25 | 2.12E-02 | 4.24E-01 |
| Hist1h2bl     | 13.84  | 8.04   | -0.82 | 2.13E-02 | 4.24E-01 |
| Plekhg5       | 11.47  | 8.72   | -0.43 | 2.15E-02 | 4.26E-01 |
| Ppp2ca        | 65.88  | 80.51  | 0.26  | 2.16E-02 | 4.27E-01 |
| Dcakd         | 16.48  | 11.13  | -0.61 | 2.17E-02 | 4.27E-01 |
| Naga          | 1.25   | 0.55   | -1.20 | 2.16E-02 | 4.27E-01 |

|               |         |         |       |          |          |
|---------------|---------|---------|-------|----------|----------|
| Scd2          | 27.99   | 22.64   | -0.34 | 2.18E-02 | 4.27E-01 |
| Eef1b2        | 36.91   | 47.31   | 0.33  | 2.16E-02 | 4.27E-01 |
| Zw10          | 1.23    | 0.49    | -1.36 | 2.18E-02 | 4.27E-01 |
| Ccdc71        | 6.66    | 4.58    | -0.57 | 2.17E-02 | 4.27E-01 |
| Gm867         | 15.88   | 22.09   | 0.44  | 2.17E-02 | 4.27E-01 |
| Cbln4         | 1.63    | 3.22    | 0.94  | 2.18E-02 | 4.27E-01 |
| Nat6          | 1.95    | 1.15    | -0.80 | 2.17E-02 | 4.27E-01 |
| Tmem269       | 0.94    | 2.17    | 1.18  | 2.19E-02 | 4.28E-01 |
| Ndufa4        | 1538.47 | 1891.41 | 0.27  | 2.19E-02 | 4.28E-01 |
| Ap1s3         | 1.39    | 2.42    | 0.77  | 2.19E-02 | 4.28E-01 |
| Tpd52         | 15.47   | 20.23   | 0.36  | 2.20E-02 | 4.28E-01 |
| Glrx5         | 27.28   | 36.85   | 0.40  | 2.21E-02 | 4.29E-01 |
| Sall2         | 11.02   | 8.79    | -0.36 | 2.21E-02 | 4.29E-01 |
| Rps13-ps1     | 84.78   | 109.81  | 0.34  | 2.21E-02 | 4.29E-01 |
| Cul2          | 8.77    | 11.62   | 0.38  | 2.22E-02 | 4.30E-01 |
| Pnkd          | 54.56   | 42.20   | -0.41 | 2.22E-02 | 4.30E-01 |
| Cspg4         | 0.53    | 0.26    | -1.07 | 2.23E-02 | 4.31E-01 |
| Rpl13         | 67.17   | 84.74   | 0.30  | 2.24E-02 | 4.32E-01 |
| Man2b1        | 3.06    | 2.02    | -0.64 | 2.24E-02 | 4.32E-01 |
| Rpl9-ps7      | 54.50   | 72.07   | 0.37  | 2.24E-02 | 4.32E-01 |
| Atpif1        | 207.46  | 258.13  | 0.28  | 2.24E-02 | 4.32E-01 |
| Pdha1         | 31.15   | 39.67   | 0.32  | 2.26E-02 | 4.32E-01 |
| Wnk2          | 9.47    | 7.11    | -0.45 | 2.25E-02 | 4.32E-01 |
| Arf3          | 467.19  | 360.87  | -0.41 | 2.26E-02 | 4.32E-01 |
| mt-Tl1        | 45.48   | 23.19   | -1.00 | 2.25E-02 | 4.32E-01 |
| Ctxn3         | 1.07    | 2.53    | 1.20  | 2.26E-02 | 4.32E-01 |
| Gm11759       | 13.43   | 21.53   | 0.65  | 2.26E-02 | 4.32E-01 |
| Rttm          | 0.29    | 0.11    | -1.39 | 2.27E-02 | 4.34E-01 |
| Hnrnpul1      | 31.47   | 24.64   | -0.39 | 2.28E-02 | 4.36E-01 |
| Gtpbp2        | 4.53    | 3.17    | -0.56 | 2.31E-02 | 4.39E-01 |
| Disp2         | 29.86   | 25.02   | -0.29 | 2.31E-02 | 4.39E-01 |
| Pgbd5         | 82.36   | 69.22   | -0.28 | 2.31E-02 | 4.39E-01 |
| Dync1h1       | 8.66    | 7.08    | -0.33 | 2.32E-02 | 4.40E-01 |
| Aip           | 18.74   | 13.78   | -0.48 | 2.32E-02 | 4.40E-01 |
| Cyp4v3        | 0.93    | 0.31    | -1.67 | 2.33E-02 | 4.40E-01 |
| Dlgap3        | 6.25    | 4.18    | -0.62 | 2.33E-02 | 4.41E-01 |
| Spin2c        | 7.29    | 12.44   | 0.75  | 2.34E-02 | 4.41E-01 |
| Zfp277        | 15.05   | 20.04   | 0.38  | 2.34E-02 | 4.41E-01 |
| Ankrd28       | 8.26    | 6.41    | -0.40 | 2.38E-02 | 4.44E-01 |
| Aif1          | 0.13    | 0.68    | 2.42  | 2.38E-02 | 4.44E-01 |
| Slc25a15      | 1.13    | 2.43    | 1.08  | 2.37E-02 | 4.44E-01 |
| Pygb          | 5.33    | 3.79    | -0.53 | 2.37E-02 | 4.44E-01 |
| Lgi3          | 6.15    | 4.42    | -0.51 | 2.37E-02 | 4.44E-01 |
| Cpne7         | 10.91   | 8.82    | -0.34 | 2.37E-02 | 4.44E-01 |
| Fam219aos     | 13.95   | 7.98    | -0.85 | 2.39E-02 | 4.44E-01 |
| A330070K13Rik | 12.07   | 5.59    | -1.15 | 2.37E-02 | 4.44E-01 |
| Arntl         | 4.33    | 6.44    | 0.54  | 2.38E-02 | 4.44E-01 |
| Znf41-ps      | 3.16    | 1.91    | -0.76 | 2.39E-02 | 4.44E-01 |
| Gm20441       | 13.88   | 8.98    | -0.66 | 2.39E-02 | 4.44E-01 |
| Gm3883        | 19.61   | 14.40   | -0.48 | 2.37E-02 | 4.44E-01 |
| Bcr           | 20.33   | 15.14   | -0.47 | 2.39E-02 | 4.44E-01 |
| Trmt11        | 0.42    | 1.08    | 1.34  | 2.42E-02 | 4.45E-01 |



|          |        |        |       |          |          |
|----------|--------|--------|-------|----------|----------|
| Ldb3     | 0.36   | 0.78   | 1.10  | 2.42E-02 | 4.45E-01 |
| Phf1     | 2.04   | 1.13   | -0.88 | 2.42E-02 | 4.45E-01 |
| Ctnnbl1  | 4.33   | 2.85   | -0.64 | 2.41E-02 | 4.45E-01 |
| Fam69a   | 39.03  | 50.88  | 0.35  | 2.41E-02 | 4.45E-01 |
| Tiparp   | 1.38   | 2.33   | 0.72  | 2.41E-02 | 4.45E-01 |
| Plxnb2   | 1.33   | 0.73   | -0.91 | 2.41E-02 | 4.45E-01 |
| Zfp574   | 6.99   | 4.97   | -0.53 | 2.40E-02 | 4.45E-01 |
| Tbca     | 223.69 | 282.17 | 0.31  | 2.43E-02 | 4.45E-01 |
| Sf3b4    | 16.40  | 12.95  | -0.37 | 2.42E-02 | 4.45E-01 |
| Gm21987  | 75.99  | 98.84  | 0.35  | 2.43E-02 | 4.45E-01 |
| Gm26805  | 2.46   | 1.41   | -0.84 | 2.43E-02 | 4.45E-01 |
| Setd4    | 0.42   | 0.17   | -1.39 | 2.44E-02 | 4.46E-01 |
| Scrt1    | 9.17   | 6.49   | -0.54 | 2.46E-02 | 4.49E-01 |
| Bex4     | 38.69  | 51.06  | 0.37  | 2.46E-02 | 4.49E-01 |
| Tmem214  | 2.80   | 2.02   | -0.50 | 2.48E-02 | 4.52E-01 |
| Ccdc65   | 1.71   | 3.15   | 0.86  | 2.48E-02 | 4.52E-01 |
| Tmem251  | 4.03   | 6.10   | 0.56  | 2.49E-02 | 4.53E-01 |
| Ndufa12  | 108.80 | 135.54 | 0.29  | 2.50E-02 | 4.54E-01 |
| Slc19a1  | 0.68   | 0.31   | -1.18 | 2.53E-02 | 4.54E-01 |
| Ezh1     | 5.30   | 4.22   | -0.36 | 2.54E-02 | 4.54E-01 |
| Atp6v0c  | 160.36 | 137.87 | -0.25 | 2.53E-02 | 4.54E-01 |
| Adh5     | 16.03  | 22.01  | 0.43  | 2.52E-02 | 4.54E-01 |
| Celf5    | 39.63  | 30.99  | -0.39 | 2.53E-02 | 4.54E-01 |
| Prelp    | 0.40   | 0.10   | -1.99 | 2.53E-02 | 4.54E-01 |
| Hrk      | 5.31   | 3.73   | -0.55 | 2.52E-02 | 4.54E-01 |
| Polr1a   | 3.06   | 1.96   | -0.69 | 2.54E-02 | 4.54E-01 |
| Ppp1r1b  | 4.12   | 2.61   | -0.70 | 2.52E-02 | 4.54E-01 |
| Gm16229  | 0.77   | 1.81   | 1.19  | 2.51E-02 | 4.54E-01 |
| Lime1    | 1.85   | 0.81   | -1.24 | 2.52E-02 | 4.54E-01 |
| Cwc22    | 5.52   | 3.18   | -0.84 | 2.55E-02 | 4.56E-01 |
| Grb10    | 3.38   | 4.66   | 0.44  | 2.56E-02 | 4.58E-01 |
| Katnb1   | 4.78   | 3.26   | -0.59 | 2.57E-02 | 4.58E-01 |
| Gm21093  | 19.70  | 14.50  | -0.48 | 2.57E-02 | 4.58E-01 |
| Fbxo9    | 30.35  | 39.19  | 0.34  | 2.58E-02 | 4.59E-01 |
| Arpc1a   | 52.16  | 64.88  | 0.28  | 2.59E-02 | 4.59E-01 |
| Ndst1    | 7.36   | 5.77   | -0.39 | 2.58E-02 | 4.59E-01 |
| Vmac     | 1.35   | 0.66   | -1.07 | 2.58E-02 | 4.59E-01 |
| Eif3e    | 67.39  | 84.25  | 0.29  | 2.63E-02 | 4.60E-01 |
| Ilkap    | 9.65   | 14.52  | 0.56  | 2.60E-02 | 4.60E-01 |
| Gfm1     | 7.59   | 9.92   | 0.36  | 2.63E-02 | 4.60E-01 |
| Rsrc1    | 1.53   | 2.10   | 0.43  | 2.61E-02 | 4.60E-01 |
| Rammet   | 147.50 | 185.50 | 0.30  | 2.62E-02 | 4.60E-01 |
| Ccdc74a  | 3.26   | 5.03   | 0.60  | 2.62E-02 | 4.60E-01 |
| Slc35e2  | 5.00   | 3.80   | -0.43 | 2.61E-02 | 4.60E-01 |
| Ccdc42   | 0.63   | 0.14   | -2.20 | 2.62E-02 | 4.60E-01 |
| Blcap    | 17.09  | 13.72  | -0.35 | 2.60E-02 | 4.60E-01 |
| Mpc1-ps  | 148.30 | 200.80 | 0.41  | 2.61E-02 | 4.60E-01 |
| Gm20503  | 52.86  | 69.71  | 0.37  | 2.62E-02 | 4.60E-01 |
| Gm26733  | 2.93   | 1.80   | -0.73 | 2.62E-02 | 4.60E-01 |
| Prn      | 0.47   | 0.17   | -1.50 | 2.63E-02 | 4.60E-01 |
| Atp6v0a1 | 25.87  | 20.66  | -0.36 | 2.64E-02 | 4.60E-01 |
| Scfd1    | 8.39   | 11.78  | 0.46  | 2.64E-02 | 4.60E-01 |

|               |        |        |       |          |          |
|---------------|--------|--------|-------|----------|----------|
| Golga5        | 3.59   | 5.34   | 0.54  | 2.64E-02 | 4.60E-01 |
| Arpc5l        | 20.06  | 25.21  | 0.30  | 2.65E-02 | 4.60E-01 |
| Aktip         | 22.21  | 27.99  | 0.30  | 2.65E-02 | 4.60E-01 |
| Samd10        | 3.22   | 1.94   | -0.77 | 2.65E-02 | 4.60E-01 |
| Dhcr7         | 4.28   | 3.09   | -0.51 | 2.65E-02 | 4.60E-01 |
| Cetn4         | 2.93   | 4.36   | 0.54  | 2.66E-02 | 4.61E-01 |
| Atp2b3        | 35.47  | 28.66  | -0.34 | 2.67E-02 | 4.62E-01 |
| Hmgxb3        | 3.01   | 2.15   | -0.52 | 2.68E-02 | 4.63E-01 |
| Gm49405       | 0.32   | 0.10   | -1.79 | 2.69E-02 | 4.64E-01 |
| Prex1         | 2.67   | 1.85   | -0.57 | 2.69E-02 | 4.64E-01 |
| Seh1l         | 8.09   | 12.15  | 0.56  | 2.69E-02 | 4.64E-01 |
| Pdcd2l        | 8.42   | 12.77  | 0.57  | 2.71E-02 | 4.65E-01 |
| Zfp839        | 2.62   | 1.36   | -0.99 | 2.71E-02 | 4.65E-01 |
| Ptprn         | 58.58  | 48.87  | -0.30 | 2.70E-02 | 4.65E-01 |
| Cerkl         | 3.73   | 2.62   | -0.55 | 2.71E-02 | 4.65E-01 |
| Gm10335       | 137.95 | 174.45 | 0.31  | 2.72E-02 | 4.66E-01 |
| Atg7          | 10.27  | 7.69   | -0.45 | 2.72E-02 | 4.66E-01 |
| Kdm4b         | 2.22   | 1.49   | -0.61 | 2.73E-02 | 4.67E-01 |
| Mrpl21        | 29.74  | 38.63  | 0.34  | 2.75E-02 | 4.69E-01 |
| Kdelr2        | 13.48  | 9.84   | -0.49 | 2.75E-02 | 4.69E-01 |
| Klf10         | 9.74   | 13.72  | 0.46  | 2.76E-02 | 4.70E-01 |
| Gm10132       | 132.61 | 167.55 | 0.31  | 2.76E-02 | 4.70E-01 |
| 4632411P08Rik | 0.20   | 0.60   | 1.57  | 2.76E-02 | 4.70E-01 |
| Ndufa2        | 221.32 | 284.01 | 0.33  | 2.77E-02 | 4.70E-01 |
| D630045J12Rik | 10.28  | 8.49   | -0.31 | 2.77E-02 | 4.70E-01 |
| Dele1         | 11.00  | 7.90   | -0.51 | 2.78E-02 | 4.71E-01 |
| Gm16061       | 3.51   | 0.98   | -1.88 | 2.78E-02 | 4.71E-01 |
| Galnt16       | 24.70  | 19.00  | -0.42 | 2.79E-02 | 4.72E-01 |
| Rilpl1        | 16.74  | 21.74  | 0.35  | 2.79E-02 | 4.72E-01 |
| Rad51ap2      | 0.31   | 0.76   | 1.26  | 2.80E-02 | 4.72E-01 |
| Nrxn2         | 2.73   | 2.08   | -0.43 | 2.80E-02 | 4.72E-01 |
| Dyrk2         | 7.70   | 5.25   | -0.59 | 2.81E-02 | 4.72E-01 |
| Frg2f1        | 6.61   | 4.68   | -0.53 | 2.81E-02 | 4.73E-01 |
| Pex6          | 3.47   | 2.33   | -0.61 | 2.82E-02 | 4.74E-01 |
| Atp5f1        | 66.99  | 86.15  | 0.34  | 2.84E-02 | 4.75E-01 |
| Prpf8         | 80.05  | 66.10  | -0.31 | 2.85E-02 | 4.75E-01 |
| Dolpp1        | 0.78   | 0.36   | -1.14 | 2.84E-02 | 4.75E-01 |
| Ehd4          | 0.90   | 0.48   | -0.93 | 2.84E-02 | 4.75E-01 |
| Atpaf1        | 26.76  | 34.12  | 0.32  | 2.85E-02 | 4.75E-01 |
| Gpc1          | 4.87   | 3.58   | -0.48 | 2.85E-02 | 4.75E-01 |
| Ctdspl        | 3.53   | 2.32   | -0.64 | 2.84E-02 | 4.75E-01 |
| Tusc1         | 12.60  | 7.86   | -0.73 | 2.84E-02 | 4.75E-01 |
| Adgrl1        | 42.14  | 35.91  | -0.26 | 2.86E-02 | 4.76E-01 |
| Copb2         | 29.99  | 38.14  | 0.32  | 2.86E-02 | 4.76E-01 |
| Dcaf15        | 1.38   | 0.56   | -1.33 | 2.87E-02 | 4.76E-01 |
| Ap2a1         | 4.19   | 3.09   | -0.47 | 2.87E-02 | 4.76E-01 |
| Maz           | 7.01   | 4.89   | -0.55 | 2.88E-02 | 4.77E-01 |
| Lix1l         | 11.06  | 7.97   | -0.51 | 2.88E-02 | 4.77E-01 |
| Gm17786       | 60.05  | 80.50  | 0.39  | 2.88E-02 | 4.77E-01 |
| Gng10         | 52.42  | 68.82  | 0.37  | 2.89E-02 | 4.77E-01 |
| Cacng8        | 6.95   | 4.37   | -0.71 | 2.89E-02 | 4.77E-01 |
| Gm15772       | 79.76  | 103.02 | 0.34  | 2.89E-02 | 4.77E-01 |

|               |        |         |       |          |          |
|---------------|--------|---------|-------|----------|----------|
| Map9          | 29.21  | 36.08   | 0.27  | 2.91E-02 | 4.79E-01 |
| Tuba1c        | 359.11 | 292.79  | -0.33 | 2.91E-02 | 4.79E-01 |
| Gm26377       | 988.63 | 1265.33 | 0.33  | 2.92E-02 | 4.80E-01 |
| Gm12892       | 10.78  | 7.22    | -0.62 | 2.92E-02 | 4.80E-01 |
| Extl3         | 9.36   | 7.45    | -0.37 | 2.93E-02 | 4.80E-01 |
| Sik3          | 33.05  | 26.90   | -0.33 | 2.93E-02 | 4.80E-01 |
| Gabarap       | 72.21  | 58.07   | -0.35 | 2.93E-02 | 4.80E-01 |
| Plbd2         | 4.81   | 3.65    | -0.43 | 2.94E-02 | 4.80E-01 |
| Slc8a3        | 1.57   | 0.93    | -0.80 | 2.95E-02 | 4.81E-01 |
| Bend5         | 4.07   | 6.31    | 0.60  | 2.95E-02 | 4.81E-01 |
| 1600029O15Rik | 1.82   | 3.43    | 0.90  | 2.96E-02 | 4.81E-01 |
| Ston2         | 0.85   | 0.48    | -0.84 | 2.98E-02 | 4.82E-01 |
| Col4a3bp      | 9.28   | 12.23   | 0.37  | 2.97E-02 | 4.82E-01 |
| Wiz           | 2.17   | 1.60    | -0.47 | 2.98E-02 | 4.82E-01 |
| Rad23b        | 35.70  | 44.25   | 0.28  | 2.99E-02 | 4.82E-01 |
| Tagln         | 0.43   | 1.14    | 1.39  | 2.97E-02 | 4.82E-01 |
| Tubb4b        | 71.29  | 88.75   | 0.28  | 2.97E-02 | 4.82E-01 |
| Rexo1         | 8.76   | 6.14    | -0.55 | 2.97E-02 | 4.82E-01 |
| Gm9905        | 0.17   | 0.63    | 1.83  | 2.99E-02 | 4.82E-01 |
| Gspt2         | 6.34   | 8.75    | 0.43  | 2.99E-02 | 4.82E-01 |
| Gm12394       | 6.96   | 4.93    | -0.54 | 2.98E-02 | 4.82E-01 |
| Zfp953        | 0.44   | 0.20    | -1.14 | 2.97E-02 | 4.82E-01 |
| Snhg6         | 5.13   | 8.40    | 0.68  | 3.00E-02 | 4.82E-01 |
| Rabgef1       | 4.66   | 7.02    | 0.57  | 3.00E-02 | 4.82E-01 |
| Stard4        | 1.93   | 2.92    | 0.57  | 3.01E-02 | 4.82E-01 |
| Btbd1         | 48.29  | 61.07   | 0.31  | 3.02E-02 | 4.84E-01 |
| Nxt1          | 6.03   | 9.29    | 0.59  | 3.02E-02 | 4.84E-01 |
| Gm13303       | 11.03  | 7.38    | -0.62 | 3.03E-02 | 4.84E-01 |
| Galnt9        | 36.64  | 27.53   | -0.45 | 3.03E-02 | 4.84E-01 |
| Cmya5         | 0.38   | 0.63    | 0.68  | 3.04E-02 | 4.84E-01 |
| Rpl5          | 60.24  | 74.27   | 0.27  | 3.04E-02 | 4.84E-01 |
| Gm5453        | 65.13  | 86.09   | 0.37  | 3.04E-02 | 4.85E-01 |
| Efr3a         | 21.75  | 26.85   | 0.27  | 3.08E-02 | 4.86E-01 |
| Rnf220        | 19.74  | 16.07   | -0.33 | 3.07E-02 | 4.86E-01 |
| Atp2b2        | 39.21  | 33.25   | -0.27 | 3.06E-02 | 4.86E-01 |
| Nucb1         | 3.34   | 2.42    | -0.51 | 3.06E-02 | 4.86E-01 |
| Sec22a        | 1.61   | 2.40    | 0.54  | 3.08E-02 | 4.86E-01 |
| Gns           | 16.32  | 13.57   | -0.30 | 3.06E-02 | 4.86E-01 |
| Parp4         | 0.33   | 0.14    | -1.30 | 3.07E-02 | 4.86E-01 |
| Gpx4          | 10.73  | 7.27    | -0.60 | 3.08E-02 | 4.86E-01 |
| Gm17202       | 17.15  | 24.03   | 0.46  | 3.06E-02 | 4.86E-01 |
| Utp14b        | 1.71   | 0.95    | -0.88 | 3.08E-02 | 4.86E-01 |
| Apopt1        | 4.07   | 5.80    | 0.48  | 3.09E-02 | 4.86E-01 |
| Mrpl15        | 6.24   | 8.07    | 0.34  | 3.09E-02 | 4.87E-01 |
| Adcy9         | 5.76   | 4.04    | -0.55 | 3.10E-02 | 4.87E-01 |
| Atp5mpl       | 714.10 | 890.11  | 0.29  | 3.13E-02 | 4.87E-01 |
| Celf3         | 30.74  | 22.45   | -0.49 | 3.13E-02 | 4.87E-01 |
| Sppl3         | 12.42  | 10.02   | -0.34 | 3.11E-02 | 4.87E-01 |
| Arpc1b        | 2.33   | 1.60    | -0.57 | 3.11E-02 | 4.87E-01 |
| Sez6l2        | 21.66  | 17.22   | -0.37 | 3.12E-02 | 4.87E-01 |
| Psenen        | 51.99  | 40.29   | -0.40 | 3.15E-02 | 4.87E-01 |
| Paqr7         | 4.45   | 3.12    | -0.55 | 3.13E-02 | 4.87E-01 |

|               |         |         |       |          |          |
|---------------|---------|---------|-------|----------|----------|
| Klhl23        | 8.82    | 11.43   | 0.34  | 3.15E-02 | 4.87E-01 |
| Tubg2         | 28.81   | 22.19   | -0.41 | 3.12E-02 | 4.87E-01 |
| Rhno1         | 2.07    | 3.30    | 0.64  | 3.15E-02 | 4.87E-01 |
| Gm10355       | 8.00    | 13.26   | 0.70  | 3.14E-02 | 4.87E-01 |
| Lin52         | 4.24    | 6.61    | 0.61  | 3.15E-02 | 4.87E-01 |
| A230065N10Rik | 1.86    | 0.77    | -1.31 | 3.11E-02 | 4.87E-01 |
| Hist1h2bn     | 9.80    | 5.39    | -0.90 | 3.11E-02 | 4.87E-01 |
| Gm26520       | 0.67    | 0.09    | -2.86 | 3.15E-02 | 4.87E-01 |
| NA            | 0.45    | 0.21    | -1.14 | 3.13E-02 | 4.87E-01 |
| Ranbp1        | 28.04   | 35.49   | 0.31  | 3.15E-02 | 4.87E-01 |
| Mapk14        | 21.58   | 27.47   | 0.31  | 3.15E-02 | 4.87E-01 |
| S100a6        | 1.45    | 0.27    | -2.41 | 3.16E-02 | 4.87E-01 |
| Pdf           | 16.05   | 21.89   | 0.42  | 3.16E-02 | 4.87E-01 |
| Peg10         | 5.72    | 4.29    | -0.44 | 3.18E-02 | 4.90E-01 |
| Eif3h         | 41.09   | 53.34   | 0.35  | 3.19E-02 | 4.90E-01 |
| Zhx3          | 9.10    | 7.48    | -0.32 | 3.19E-02 | 4.90E-01 |
| Acat3         | 35.71   | 44.74   | 0.29  | 3.20E-02 | 4.90E-01 |
| Ttc9b         | 29.34   | 21.75   | -0.47 | 3.23E-02 | 4.93E-01 |
| Vps52         | 7.74    | 5.76    | -0.46 | 3.23E-02 | 4.93E-01 |
| Glipr1        | 7.79    | 11.84   | 0.57  | 3.22E-02 | 4.93E-01 |
| Mipep         | 9.83    | 13.39   | 0.41  | 3.24E-02 | 4.95E-01 |
| Gm10069       | 1.41    | 2.26    | 0.65  | 3.24E-02 | 4.95E-01 |
| Shisal1       | 11.27   | 9.34    | -0.30 | 3.24E-02 | 4.95E-01 |
| Efna2         | 1.24    | 0.48    | -1.39 | 3.25E-02 | 4.95E-01 |
| Slc25a4       | 335.81  | 415.04  | 0.28  | 3.25E-02 | 4.95E-01 |
| Trim46        | 9.32    | 7.38    | -0.37 | 3.25E-02 | 4.95E-01 |
| Rps13-ps5     | 69.74   | 90.11   | 0.34  | 3.26E-02 | 4.95E-01 |
| Lrrfip2       | 7.55    | 10.19   | 0.40  | 3.27E-02 | 4.96E-01 |
| Tuft1         | 0.20    | 0.87    | 2.11  | 3.28E-02 | 4.97E-01 |
| Abhd5         | 4.62    | 2.77    | -0.77 | 3.28E-02 | 4.97E-01 |
| Tnr           | 8.65    | 6.74    | -0.40 | 3.30E-02 | 4.99E-01 |
| Mmp24         | 8.92    | 7.06    | -0.37 | 3.30E-02 | 4.99E-01 |
| Zfp628        | 2.17    | 1.39    | -0.68 | 3.31E-02 | 5.00E-01 |
| Ell3          | 2.43    | 5.03    | 1.03  | 3.32E-02 | 5.00E-01 |
| Esyt3         | 0.24    | 0.07    | -1.77 | 3.32E-02 | 5.00E-01 |
| Plec          | 0.51    | 0.34    | -0.61 | 3.33E-02 | 5.01E-01 |
| Kctd17        | 3.87    | 2.42    | -0.72 | 3.33E-02 | 5.01E-01 |
| Zfp423        | 4.90    | 3.50    | -0.52 | 3.34E-02 | 5.01E-01 |
| 2510002D24Rik | 3.21    | 5.27    | 0.68  | 3.34E-02 | 5.02E-01 |
| Ppp1r16b      | 8.62    | 7.05    | -0.32 | 3.35E-02 | 5.02E-01 |
| Dnmt3a        | 1.64    | 1.26    | -0.42 | 3.36E-02 | 5.03E-01 |
| Hist1h2bc     | 31.19   | 46.08   | 0.54  | 3.38E-02 | 5.03E-01 |
| Orc2          | 7.84    | 10.73   | 0.43  | 3.37E-02 | 5.03E-01 |
| Mrps33        | 353.92  | 435.85  | 0.27  | 3.39E-02 | 5.03E-01 |
| Me1           | 17.78   | 23.68   | 0.39  | 3.37E-02 | 5.03E-01 |
| Shc4          | 2.96    | 2.08    | -0.54 | 3.37E-02 | 5.03E-01 |
| Camsap3       | 5.09    | 3.69    | -0.50 | 3.39E-02 | 5.03E-01 |
| Polr2k        | 46.48   | 61.60   | 0.38  | 3.39E-02 | 5.03E-01 |
| Tank          | 3.70    | 4.93    | 0.39  | 3.38E-02 | 5.03E-01 |
| Fndc10        | 15.57   | 12.12   | -0.40 | 3.38E-02 | 5.03E-01 |
| NA            | 15.59   | 12.13   | -0.40 | 3.38E-02 | 5.03E-01 |
| Gm6061        | 1294.28 | 1562.57 | 0.24  | 3.39E-02 | 5.03E-01 |

|              |        |        |       |          |          |
|--------------|--------|--------|-------|----------|----------|
| Zfp84        | 5.43   | 3.97   | -0.49 | 3.40E-02 | 5.03E-01 |
| Pop5         | 31.41  | 39.68  | 0.31  | 3.41E-02 | 5.03E-01 |
| Gm9396       | 25.46  | 35.34  | 0.44  | 3.40E-02 | 5.03E-01 |
| Spata7       | 3.87   | 5.19   | 0.39  | 3.42E-02 | 5.05E-01 |
| Dtnbp1       | 58.27  | 73.72  | 0.31  | 3.42E-02 | 5.05E-01 |
| Nipal3       | 3.64   | 2.83   | -0.40 | 3.43E-02 | 5.05E-01 |
| Mpc1         | 69.89  | 92.79  | 0.38  | 3.44E-02 | 5.05E-01 |
| Camkk2       | 15.76  | 19.49  | 0.27  | 3.44E-02 | 5.05E-01 |
| Cluh         | 5.49   | 4.15   | -0.44 | 3.45E-02 | 5.06E-01 |
| Fahd1        | 19.51  | 27.87  | 0.49  | 3.45E-02 | 5.06E-01 |
| Morn4        | 53.32  | 40.29  | -0.44 | 3.45E-02 | 5.06E-01 |
| Rps15a-ps7   | 97.18  | 123.93 | 0.32  | 3.45E-02 | 5.06E-01 |
| Gm2962       | 23.04  | 34.04  | 0.53  | 3.46E-02 | 5.06E-01 |
| Lsm12        | 39.56  | 31.59  | -0.36 | 3.47E-02 | 5.06E-01 |
| Psm14        | 25.25  | 33.22  | 0.36  | 3.47E-02 | 5.06E-01 |
| Sh3bgrl3     | 328.71 | 267.36 | -0.33 | 3.47E-02 | 5.06E-01 |
| Rwdd1        | 55.44  | 69.87  | 0.30  | 3.48E-02 | 5.07E-01 |
| Rpl22l1      | 141.64 | 188.36 | 0.38  | 3.48E-02 | 5.07E-01 |
| Rars         | 7.86   | 10.76  | 0.42  | 3.49E-02 | 5.07E-01 |
| Lrp8         | 4.59   | 3.69   | -0.35 | 3.50E-02 | 5.08E-01 |
| Fam222b      | 33.00  | 27.15  | -0.32 | 3.51E-02 | 5.08E-01 |
| Ctnna1       | 5.40   | 7.36   | 0.41  | 3.50E-02 | 5.08E-01 |
| Zfp14        | 3.85   | 2.22   | -0.83 | 3.50E-02 | 5.08E-01 |
| Zfp992       | 1.73   | 1.04   | -0.78 | 3.51E-02 | 5.08E-01 |
| Gm15879      | 2.02   | 0.87   | -1.24 | 3.50E-02 | 5.08E-01 |
| Manbal       | 17.28  | 12.59  | -0.49 | 3.52E-02 | 5.08E-01 |
| Ctsl         | 13.55  | 18.93  | 0.45  | 3.54E-02 | 5.09E-01 |
| Preli1       | 71.26  | 58.41  | -0.32 | 3.53E-02 | 5.09E-01 |
| Mgat5        | 4.88   | 3.59   | -0.48 | 3.53E-02 | 5.09E-01 |
| Zcchc2       | 8.40   | 10.78  | 0.33  | 3.54E-02 | 5.09E-01 |
| Serpina3e-ps | 6.68   | 3.15   | -1.11 | 3.54E-02 | 5.09E-01 |
| Rangap1      | 20.50  | 15.99  | -0.39 | 3.55E-02 | 5.10E-01 |
| Thoc1        | 8.81   | 11.75  | 0.39  | 3.55E-02 | 5.10E-01 |
| Syvn1        | 10.56  | 8.28   | -0.38 | 3.55E-02 | 5.10E-01 |
| Pdpr         | 2.59   | 1.76   | -0.59 | 3.55E-02 | 5.10E-01 |
| Hrrr         | 0.24   | 0.02   | -3.96 | 3.56E-02 | 5.10E-01 |
| Lancl3       | 1.18   | 0.64   | -0.91 | 3.57E-02 | 5.11E-01 |
| Mpc2         | 49.57  | 61.60  | 0.28  | 3.58E-02 | 5.11E-01 |
| Stpg1        | 3.15   | 1.92   | -0.75 | 3.57E-02 | 5.11E-01 |
| Rps15a-ps6   | 115.76 | 146.69 | 0.31  | 3.58E-02 | 5.11E-01 |
| Snrpd2       | 77.94  | 59.09  | -0.44 | 3.59E-02 | 5.12E-01 |
| Slc29a3      | 4.43   | 2.95   | -0.62 | 3.61E-02 | 5.13E-01 |
| Foxp4        | 4.57   | 3.02   | -0.64 | 3.61E-02 | 5.13E-01 |
| Ugt8a        | 0.61   | 0.26   | -1.27 | 3.61E-02 | 5.13E-01 |
| Zdhhc14      | 13.63  | 10.76  | -0.38 | 3.61E-02 | 5.13E-01 |
| Gm16740      | 172.58 | 213.76 | 0.28  | 3.60E-02 | 5.13E-01 |
| Rasgrp4      | 1.13   | 0.66   | -0.82 | 3.62E-02 | 5.13E-01 |
| NA           | 607.86 | 749.13 | 0.27  | 3.62E-02 | 5.13E-01 |
| Tmem201      | 2.27   | 1.61   | -0.53 | 3.63E-02 | 5.13E-01 |
| Ganc         | 0.83   | 0.52   | -0.71 | 3.63E-02 | 5.13E-01 |
| Dek          | 24.30  | 30.58  | 0.30  | 3.63E-02 | 5.14E-01 |
| Trappc6b     | 142.92 | 179.35 | 0.30  | 3.64E-02 | 5.14E-01 |

|               |        |        |       |          |          |
|---------------|--------|--------|-------|----------|----------|
| Gm21985       | 7.82   | 6.27   | -0.36 | 3.64E-02 | 5.14E-01 |
| Eif1b         | 109.16 | 136.25 | 0.29  | 3.67E-02 | 5.14E-01 |
| Cnot8         | 11.04  | 14.42  | 0.35  | 3.67E-02 | 5.14E-01 |
| Mink1         | 18.33  | 14.53  | -0.37 | 3.66E-02 | 5.14E-01 |
| Zc3h7b        | 5.64   | 3.99   | -0.54 | 3.66E-02 | 5.14E-01 |
| Tmem231       | 2.92   | 1.73   | -0.79 | 3.66E-02 | 5.14E-01 |
| Inpp5j        | 4.14   | 3.12   | -0.44 | 3.67E-02 | 5.14E-01 |
| Usp27x        | 7.86   | 10.48  | 0.39  | 3.68E-02 | 5.14E-01 |
| Chst8         | 3.58   | 2.48   | -0.57 | 3.68E-02 | 5.14E-01 |
| B2m           | 104.14 | 154.70 | 0.54  | 3.68E-02 | 5.14E-01 |
| Kiz           | 5.79   | 8.22   | 0.47  | 3.68E-02 | 5.14E-01 |
| Ttbk1         | 3.37   | 2.44   | -0.50 | 3.69E-02 | 5.14E-01 |
| Gstcd         | 0.23   | 0.53   | 1.19  | 3.68E-02 | 5.14E-01 |
| Fscn1         | 14.21  | 10.61  | -0.46 | 3.69E-02 | 5.15E-01 |
| Gm15920       | 176.27 | 219.73 | 0.29  | 3.70E-02 | 5.15E-01 |
| Emd           | 51.23  | 63.44  | 0.27  | 3.71E-02 | 5.16E-01 |
| Sec11c        | 12.16  | 16.09  | 0.37  | 3.72E-02 | 5.16E-01 |
| Magee2        | 16.96  | 12.57  | -0.46 | 3.72E-02 | 5.16E-01 |
| Lrrc20        | 14.38  | 11.19  | -0.40 | 3.71E-02 | 5.16E-01 |
| Trerf1        | 12.12  | 9.26   | -0.43 | 3.72E-02 | 5.16E-01 |
| Hdac9         | 19.57  | 25.24  | 0.34  | 3.73E-02 | 5.16E-01 |
| Hcn3          | 0.88   | 0.50   | -0.83 | 3.73E-02 | 5.16E-01 |
| Rela          | 1.62   | 0.94   | -0.81 | 3.73E-02 | 5.16E-01 |
| Stard3        | 2.20   | 0.95   | -1.27 | 3.75E-02 | 5.16E-01 |
| Dhx33         | 6.45   | 8.27   | 0.33  | 3.74E-02 | 5.16E-01 |
| Lypd6         | 0.90   | 0.37   | -1.31 | 3.74E-02 | 5.16E-01 |
| Nrep          | 38.85  | 51.14  | 0.36  | 3.75E-02 | 5.17E-01 |
| Chrna7        | 6.99   | 5.04   | -0.50 | 3.76E-02 | 5.17E-01 |
| Slc16a2       | 11.01  | 8.88   | -0.34 | 3.76E-02 | 5.17E-01 |
| Ncam1         | 49.56  | 42.09  | -0.27 | 3.77E-02 | 5.17E-01 |
| Aplp1         | 466.38 | 403.21 | -0.24 | 3.78E-02 | 5.17E-01 |
| B3galnt2      | 2.93   | 4.25   | 0.51  | 3.78E-02 | 5.17E-01 |
| Teddm2        | 1.38   | 0.58   | -1.29 | 3.77E-02 | 5.17E-01 |
| 9-Sep         | 5.48   | 4.15   | -0.44 | 3.78E-02 | 5.17E-01 |
| Timp3         | 0.68   | 0.34   | -1.04 | 3.79E-02 | 5.18E-01 |
| Wdtdc1        | 8.57   | 6.27   | -0.49 | 3.79E-02 | 5.18E-01 |
| Mrps23        | 14.44  | 19.23  | 0.38  | 3.81E-02 | 5.19E-01 |
| Ganab         | 7.93   | 6.20   | -0.39 | 3.81E-02 | 5.19E-01 |
| Coq6          | 0.72   | 1.43   | 0.96  | 3.82E-02 | 5.20E-01 |
| Gsk3a         | 209.80 | 172.83 | -0.31 | 3.82E-02 | 5.20E-01 |
| 4930419G24Rik | 10.08  | 6.25   | -0.73 | 3.82E-02 | 5.20E-01 |
| Rgs11         | 0.37   | 0.10   | -1.91 | 3.85E-02 | 5.21E-01 |
| Rftn2         | 0.11   | 0.32   | 1.52  | 3.84E-02 | 5.21E-01 |
| Gm6498        | 0.92   | 0.39   | -1.25 | 3.84E-02 | 5.21E-01 |
| Ubr4          | 3.87   | 3.03   | -0.39 | 3.84E-02 | 5.21E-01 |
| Gm13750       | 29.57  | 41.83  | 0.47  | 3.86E-02 | 5.23E-01 |
| Timm9         | 36.78  | 47.56  | 0.34  | 3.87E-02 | 5.23E-01 |
| Fyco1         | 2.92   | 2.07   | -0.53 | 3.87E-02 | 5.23E-01 |
| Rps15a-ps5    | 47.96  | 63.25  | 0.37  | 3.87E-02 | 5.23E-01 |
| Psma2         | 159.64 | 195.72 | 0.26  | 3.89E-02 | 5.25E-01 |
| Nab2          | 9.42   | 6.33   | -0.62 | 3.89E-02 | 5.25E-01 |
| Pagr1b        | 10.09  | 6.21   | -0.74 | 3.89E-02 | 5.25E-01 |

|               |        |        |       |          |          |
|---------------|--------|--------|-------|----------|----------|
| Crtc1         | 16.61  | 13.83  | -0.30 | 3.93E-02 | 5.25E-01 |
| Rab5a         | 17.13  | 22.16  | 0.34  | 3.94E-02 | 5.25E-01 |
| Dcbld1        | 0.61   | 1.13   | 0.86  | 3.93E-02 | 5.25E-01 |
| Rdh14         | 31.57  | 40.16  | 0.32  | 3.95E-02 | 5.25E-01 |
| Serpina3n     | 54.58  | 43.55  | -0.36 | 3.93E-02 | 5.25E-01 |
| Bmpr1a        | 8.78   | 11.36  | 0.34  | 3.92E-02 | 5.25E-01 |
| Pi4k2b        | 0.25   | 0.07   | -1.86 | 3.93E-02 | 5.25E-01 |
| Proser3       | 0.90   | 0.49   | -0.90 | 3.92E-02 | 5.25E-01 |
| Man2a2        | 26.45  | 22.52  | -0.27 | 3.91E-02 | 5.25E-01 |
| Daam2         | 0.33   | 0.11   | -1.60 | 3.92E-02 | 5.25E-01 |
| Prrt3         | 2.52   | 1.23   | -1.07 | 3.94E-02 | 5.25E-01 |
| Sgms2         | 0.26   | 0.07   | -1.89 | 3.90E-02 | 5.25E-01 |
| Mrfap1        | 520.90 | 647.01 | 0.28  | 3.95E-02 | 5.25E-01 |
| Slit3         | 12.84  | 10.46  | -0.33 | 3.91E-02 | 5.25E-01 |
| Atp5l-ps1     | 512.91 | 639.54 | 0.29  | 3.95E-02 | 5.25E-01 |
| Gm12841       | 3.30   | 1.14   | -1.56 | 3.95E-02 | 5.25E-01 |
| Ung           | 0.57   | 1.19   | 1.03  | 3.96E-02 | 5.25E-01 |
| Egln2         | 5.31   | 3.49   | -0.64 | 3.96E-02 | 5.25E-01 |
| Gm13767       | 23.99  | 18.12  | -0.44 | 3.96E-02 | 5.25E-01 |
| Mocs2         | 13.56  | 16.60  | 0.26  | 3.97E-02 | 5.25E-01 |
| Slc7a4        | 4.06   | 2.89   | -0.52 | 3.97E-02 | 5.25E-01 |
| C030047K22Rik | 1.56   | 0.41   | -1.97 | 3.97E-02 | 5.25E-01 |
| Tom1l2        | 21.58  | 18.40  | -0.26 | 4.13E-02 | 5.26E-01 |
| Nfix          | 49.26  | 40.32  | -0.33 | 4.03E-02 | 5.26E-01 |
| Car11         | 62.34  | 43.77  | -0.55 | 4.00E-02 | 5.26E-01 |
| Efnb3         | 18.24  | 14.97  | -0.32 | 4.02E-02 | 5.26E-01 |
| Cluap1        | 7.78   | 11.42  | 0.53  | 4.03E-02 | 5.26E-01 |
| Adss          | 30.42  | 37.39  | 0.26  | 4.14E-02 | 5.26E-01 |
| Dpep1         | 0.73   | 0.12   | -2.69 | 4.00E-02 | 5.26E-01 |
| Katna1        | 1.42   | 2.60   | 0.84  | 4.11E-02 | 5.26E-01 |
| Timm13        | 16.49  | 11.82  | -0.52 | 4.02E-02 | 5.26E-01 |
| Cacna1g       | 1.52   | 1.06   | -0.56 | 4.07E-02 | 5.26E-01 |
| Ylpm1         | 18.98  | 15.84  | -0.30 | 4.08E-02 | 5.26E-01 |
| Htr1a         | 12.24  | 9.20   | -0.45 | 4.05E-02 | 5.26E-01 |
| Celsr3        | 0.86   | 0.60   | -0.54 | 4.05E-02 | 5.26E-01 |
| Paqr4         | 12.10  | 8.92   | -0.48 | 4.12E-02 | 5.26E-01 |
| Cnpy3         | 7.09   | 5.20   | -0.48 | 4.07E-02 | 5.26E-01 |
| Fth1          | 779.52 | 959.05 | 0.27  | 4.15E-02 | 5.26E-01 |
| Dpf2          | 6.54   | 5.19   | -0.37 | 4.02E-02 | 5.26E-01 |
| Ric8a         | 7.62   | 9.80   | 0.33  | 4.10E-02 | 5.26E-01 |
| Rrbp1         | 0.54   | 0.30   | -0.91 | 4.09E-02 | 5.26E-01 |
| Ndufb5        | 94.88  | 117.29 | 0.28  | 4.15E-02 | 5.26E-01 |
| Bche          | 0.91   | 0.43   | -1.13 | 4.05E-02 | 5.26E-01 |
| Cmpk1         | 45.38  | 56.95  | 0.30  | 4.05E-02 | 5.26E-01 |
| Sfswap        | 5.93   | 4.42   | -0.45 | 4.06E-02 | 5.26E-01 |
| Fam189a1      | 44.25  | 35.76  | -0.34 | 4.08E-02 | 5.26E-01 |
| Adgra2        | 0.30   | 0.59   | 0.92  | 4.11E-02 | 5.26E-01 |
| Ist1          | 31.35  | 39.89  | 0.32  | 4.13E-02 | 5.26E-01 |
| Psm4          | 31.21  | 39.39  | 0.30  | 4.11E-02 | 5.26E-01 |
| Hmg20a        | 20.96  | 17.04  | -0.33 | 4.02E-02 | 5.26E-01 |
| Farp2         | 3.95   | 5.28   | 0.39  | 4.14E-02 | 5.26E-01 |
| Fam69b        | 6.78   | 4.99   | -0.47 | 4.10E-02 | 5.26E-01 |

|           |        |        |       |          |          |
|-----------|--------|--------|-------|----------|----------|
| Igfbp7    | 2.54   | 4.57   | 0.82  | 4.06E-02 | 5.26E-01 |
| Stk35     | 2.94   | 2.11   | -0.51 | 4.07E-02 | 5.26E-01 |
| CntlIn    | 2.59   | 3.55   | 0.42  | 4.13E-02 | 5.26E-01 |
| Bend3     | 1.64   | 1.01   | -0.73 | 4.07E-02 | 5.26E-01 |
| Vars2     | 0.83   | 0.49   | -0.79 | 4.15E-02 | 5.26E-01 |
| Stub1     | 22.70  | 18.04  | -0.37 | 4.09E-02 | 5.26E-01 |
| Lrp1      | 3.07   | 2.33   | -0.44 | 4.04E-02 | 5.26E-01 |
| Etfrf1    | 13.73  | 17.59  | 0.33  | 4.04E-02 | 5.26E-01 |
| Tox3      | 7.73   | 5.78   | -0.45 | 4.15E-02 | 5.26E-01 |
| Mageh1    | 9.69   | 14.11  | 0.52  | 4.15E-02 | 5.26E-01 |
| Lurap1l   | 16.08  | 21.25  | 0.37  | 4.14E-02 | 5.26E-01 |
| Ankrd34a  | 94.76  | 73.51  | -0.41 | 4.13E-02 | 5.26E-01 |
| Tmem248   | 12.00  | 9.75   | -0.33 | 4.08E-02 | 5.26E-01 |
| Serpinb6a | 2.52   | 3.59   | 0.48  | 4.13E-02 | 5.26E-01 |
| mt-Atp6   | 76.65  | 51.63  | -0.59 | 4.03E-02 | 5.26E-01 |
| Wdr35     | 1.94   | 2.86   | 0.53  | 4.15E-02 | 5.26E-01 |
| Ptprz1    | 2.77   | 1.99   | -0.51 | 4.09E-02 | 5.26E-01 |
| Eloc      | 109.56 | 138.60 | 0.31  | 4.10E-02 | 5.26E-01 |
| H3f3c     | 133.42 | 110.60 | -0.30 | 4.11E-02 | 5.26E-01 |
| Gm26596   | 2.90   | 1.88   | -0.67 | 4.01E-02 | 5.26E-01 |
| Arg2      | 9.90   | 14.24  | 0.50  | 4.16E-02 | 5.27E-01 |
| Tesk1     | 8.99   | 7.06   | -0.38 | 4.17E-02 | 5.27E-01 |
| Med17     | 2.42   | 3.74   | 0.60  | 4.19E-02 | 5.29E-01 |
| NA        | 25.52  | 15.50  | -0.76 | 4.19E-02 | 5.29E-01 |
| Amigo1    | 11.02  | 8.73   | -0.37 | 4.18E-02 | 5.29E-01 |
| Oprm1     | 0.21   | 0.50   | 1.21  | 4.32E-02 | 5.29E-01 |
| Nacc1     | 34.77  | 27.81  | -0.36 | 4.32E-02 | 5.29E-01 |
| Slc4a3    | 1.51   | 1.09   | -0.50 | 4.34E-02 | 5.29E-01 |
| Phax      | 19.15  | 24.18  | 0.30  | 4.32E-02 | 5.29E-01 |
| Tenm1     | 5.72   | 4.79   | -0.29 | 4.21E-02 | 5.29E-01 |
| Gid4      | 6.10   | 4.83   | -0.37 | 4.31E-02 | 5.29E-01 |
| Rack1     | 10.43  | 13.29  | 0.32  | 4.20E-02 | 5.29E-01 |
| Mettl3    | 2.52   | 3.87   | 0.59  | 4.31E-02 | 5.29E-01 |
| Ndufa5    | 118.19 | 151.28 | 0.32  | 4.29E-02 | 5.29E-01 |
| Ndufv2    | 66.57  | 82.46  | 0.28  | 4.26E-02 | 5.29E-01 |
| Setbp1    | 9.39   | 7.82   | -0.30 | 4.25E-02 | 5.29E-01 |
| Nabp2     | 40.22  | 33.15  | -0.31 | 4.29E-02 | 5.29E-01 |
| Nvl       | 3.70   | 5.15   | 0.44  | 4.30E-02 | 5.29E-01 |
| F5        | 0.44   | 0.13   | -1.83 | 4.27E-02 | 5.29E-01 |
| Suv39h2   | 3.90   | 2.67   | -0.58 | 4.31E-02 | 5.29E-01 |
| Gss       | 0.97   | 0.60   | -0.73 | 4.26E-02 | 5.29E-01 |
| Dmac1     | 48.20  | 61.46  | 0.32  | 4.27E-02 | 5.29E-01 |
| Nsun7     | 0.78   | 1.42   | 0.83  | 4.20E-02 | 5.29E-01 |
| Coro1a    | 7.60   | 5.76   | -0.44 | 4.30E-02 | 5.29E-01 |
| Abcg4     | 5.77   | 4.27   | -0.47 | 4.33E-02 | 5.29E-01 |
| Scaf11    | 7.34   | 9.19   | 0.30  | 4.31E-02 | 5.29E-01 |
| Scara3    | 0.46   | 0.95   | 1.02  | 4.27E-02 | 5.29E-01 |
| G6pc3     | 8.70   | 6.32   | -0.50 | 4.32E-02 | 5.29E-01 |
| Mospd3    | 23.75  | 17.11  | -0.51 | 4.26E-02 | 5.29E-01 |
| Tbcel     | 4.46   | 3.35   | -0.45 | 4.21E-02 | 5.29E-01 |
| Scarb1    | 1.12   | 0.68   | -0.76 | 4.23E-02 | 5.29E-01 |
| Tmem268   | 1.20   | 2.15   | 0.80  | 4.25E-02 | 5.29E-01 |



|           |        |        |       |          |          |
|-----------|--------|--------|-------|----------|----------|
| Ppp1r15b  | 3.29   | 4.48   | 0.41  | 4.21E-02 | 5.29E-01 |
| Lrrc75a   | 1.55   | 2.93   | 0.89  | 4.32E-02 | 5.29E-01 |
| Sox1ot    | 1.36   | 0.80   | -0.81 | 4.29E-02 | 5.29E-01 |
| Magi3     | 7.26   | 9.54   | 0.37  | 4.33E-02 | 5.29E-01 |
| Rps6-ps2  | 23.53  | 31.83  | 0.41  | 4.22E-02 | 5.29E-01 |
| Zfp462    | 13.84  | 10.54  | -0.44 | 4.26E-02 | 5.29E-01 |
| Zfp873    | 2.98   | 4.80   | 0.66  | 4.25E-02 | 5.29E-01 |
| Grm4      | 1.96   | 1.32   | -0.60 | 4.23E-02 | 5.29E-01 |
| Hnrnpr    | 10.27  | 12.83  | 0.29  | 4.23E-02 | 5.29E-01 |
| Gpr88     | 0.68   | 1.29   | 0.88  | 4.30E-02 | 5.29E-01 |
| Fat3      | 9.61   | 7.65   | -0.37 | 4.25E-02 | 5.29E-01 |
| Txnrd2    | 1.69   | 0.95   | -0.87 | 4.24E-02 | 5.29E-01 |
| Gm26384   | 318.30 | 417.72 | 0.36  | 4.23E-02 | 5.29E-01 |
| Bambi-ps1 | 1.41   | 0.38   | -1.93 | 4.32E-02 | 5.29E-01 |
| Gm14329   | 3.47   | 1.56   | -1.19 | 4.34E-02 | 5.29E-01 |
| Gm6395    | 123.55 | 157.19 | 0.32  | 4.30E-02 | 5.29E-01 |
| Syt6      | 2.02   | 3.21   | 0.64  | 4.36E-02 | 5.31E-01 |
| Pcmt1     | 41.21  | 50.36  | 0.26  | 4.37E-02 | 5.32E-01 |
| Ptp4a3    | 1.68   | 1.10   | -0.65 | 4.37E-02 | 5.32E-01 |
| Snrnp48   | 3.46   | 5.53   | 0.65  | 4.39E-02 | 5.32E-01 |
| Cog8      | 8.73   | 11.43  | 0.36  | 4.39E-02 | 5.32E-01 |
| Gm4924    | 0.38   | 0.09   | -2.09 | 4.40E-02 | 5.32E-01 |
| Gm14278   | 53.84  | 38.73  | -0.50 | 4.39E-02 | 5.32E-01 |
| Gm17036   | 32.06  | 46.89  | 0.52  | 4.39E-02 | 5.32E-01 |
| Ing2      | 6.99   | 9.50   | 0.41  | 4.40E-02 | 5.33E-01 |
| Srsf1     | 10.01  | 12.40  | 0.28  | 4.41E-02 | 5.33E-01 |
| Crocc     | 0.30   | 0.15   | -1.02 | 4.41E-02 | 5.33E-01 |
| Rpl36a    | 48.93  | 60.52  | 0.27  | 4.41E-02 | 5.33E-01 |
| Gm15832   | 12.26  | 17.17  | 0.46  | 4.41E-02 | 5.33E-01 |
| Gm20671   | 9.38   | 6.59   | -0.55 | 4.42E-02 | 5.33E-01 |
| Ncan      | 65.33  | 56.73  | -0.24 | 4.46E-02 | 5.35E-01 |
| Sod2      | 171.38 | 141.89 | -0.31 | 4.45E-02 | 5.35E-01 |
| Acap3     | 9.05   | 7.21   | -0.36 | 4.45E-02 | 5.35E-01 |
| Gemin6    | 3.65   | 6.22   | 0.74  | 4.45E-02 | 5.35E-01 |
| NA        | 22.53  | 15.77  | -0.55 | 4.46E-02 | 5.35E-01 |
| Gm15793   | 12.53  | 18.84  | 0.56  | 4.46E-02 | 5.35E-01 |
| Wdr6      | 12.54  | 15.94  | 0.32  | 4.47E-02 | 5.36E-01 |
| Tnk2      | 7.68   | 5.97   | -0.40 | 4.51E-02 | 5.37E-01 |
| Incenp    | 0.80   | 1.44   | 0.82  | 4.49E-02 | 5.37E-01 |
| Dnajb6    | 48.54  | 61.23  | 0.31  | 4.50E-02 | 5.37E-01 |
| Sigmar1   | 3.14   | 2.18   | -0.56 | 4.50E-02 | 5.37E-01 |
| Tmc7      | 1.47   | 0.91   | -0.74 | 4.51E-02 | 5.37E-01 |
| Zfp691    | 1.86   | 0.96   | -1.00 | 4.51E-02 | 5.37E-01 |
| Zscan29   | 0.89   | 1.39   | 0.61  | 4.50E-02 | 5.37E-01 |
| Grwd1     | 1.71   | 2.90   | 0.73  | 4.50E-02 | 5.37E-01 |
| Gm6472    | 142.09 | 173.18 | 0.25  | 4.49E-02 | 5.37E-01 |
| Ido1      | 0.62   | 0.07   | -3.20 | 4.52E-02 | 5.38E-01 |
| Ptpn21    | 1.17   | 0.58   | -1.05 | 4.52E-02 | 5.38E-01 |
| Arhgap39  | 13.71  | 11.33  | -0.31 | 4.54E-02 | 5.38E-01 |
| Klhl35    | 0.49   | 0.16   | -1.67 | 4.54E-02 | 5.38E-01 |
| Sez6l     | 24.02  | 19.71  | -0.32 | 4.54E-02 | 5.38E-01 |
| Sco1      | 1.73   | 1.17   | -0.60 | 4.54E-02 | 5.38E-01 |

|               |        |        |       |          |          |
|---------------|--------|--------|-------|----------|----------|
| Rac3          | 0.73   | 0.24   | -1.64 | 4.55E-02 | 5.38E-01 |
| Clcn6         | 10.35  | 8.64   | -0.29 | 4.55E-02 | 5.39E-01 |
| Gm21981       | 29.24  | 23.44  | -0.35 | 4.56E-02 | 5.39E-01 |
| Polr2a        | 10.82  | 8.75   | -0.34 | 4.57E-02 | 5.40E-01 |
| Tmem38b       | 2.06   | 3.01   | 0.51  | 4.58E-02 | 5.40E-01 |
| Rspo1         | 1.22   | 0.33   | -1.94 | 4.58E-02 | 5.40E-01 |
| Fam183b       | 13.18  | 20.05  | 0.58  | 4.57E-02 | 5.40E-01 |
| Camta2        | 150.63 | 123.85 | -0.32 | 4.58E-02 | 5.40E-01 |
| Micall1       | 1.98   | 1.44   | -0.49 | 4.60E-02 | 5.41E-01 |
| Gm11605       | 24.79  | 17.95  | -0.50 | 4.60E-02 | 5.41E-01 |
| Gm11425       | 22.74  | 31.79  | 0.45  | 4.60E-02 | 5.41E-01 |
| Fut9          | 5.25   | 6.69   | 0.32  | 4.61E-02 | 5.42E-01 |
| Ppih          | 7.76   | 10.91  | 0.47  | 4.62E-02 | 5.43E-01 |
| Mlh3          | 7.94   | 5.86   | -0.47 | 4.64E-02 | 5.43E-01 |
| Rpl30         | 63.48  | 77.10  | 0.25  | 4.64E-02 | 5.43E-01 |
| Tspyl3        | 10.50  | 8.09   | -0.41 | 4.64E-02 | 5.43E-01 |
| Ift43         | 4.10   | 6.78   | 0.69  | 4.65E-02 | 5.43E-01 |
| Gm14138       | 26.16  | 35.57  | 0.42  | 4.65E-02 | 5.43E-01 |
| Cacnb3        | 52.86  | 44.01  | -0.30 | 4.67E-02 | 5.46E-01 |
| Fbxw5         | 21.55  | 17.39  | -0.35 | 4.68E-02 | 5.46E-01 |
| Cbl           | 12.89  | 10.77  | -0.29 | 4.68E-02 | 5.46E-01 |
| Lamtor3       | 30.16  | 38.19  | 0.31  | 4.68E-02 | 5.46E-01 |
| Myo19         | 2.83   | 3.96   | 0.46  | 4.70E-02 | 5.46E-01 |
| Ccndbp1       | 31.21  | 37.89  | 0.25  | 4.72E-02 | 5.46E-01 |
| Rps6kb2       | 1.45   | 0.82   | -0.86 | 4.70E-02 | 5.46E-01 |
| Sc5d          | 9.50   | 7.20   | -0.44 | 4.73E-02 | 5.46E-01 |
| Fam96a        | 15.46  | 21.26  | 0.43  | 4.70E-02 | 5.46E-01 |
| Rbbp8         | 1.45   | 2.55   | 0.79  | 4.72E-02 | 5.46E-01 |
| Spidr         | 1.30   | 0.72   | -0.90 | 4.72E-02 | 5.46E-01 |
| Nat8l         | 15.98  | 12.64  | -0.38 | 4.71E-02 | 5.46E-01 |
| Mphosph8      | 12.88  | 17.31  | 0.40  | 4.69E-02 | 5.46E-01 |
| Ccl21b        | 7.90   | 4.07   | -1.00 | 4.72E-02 | 5.46E-01 |
| A330074K22Rik | 0.44   | 0.13   | -1.74 | 4.72E-02 | 5.46E-01 |
| Zic5          | 0.33   | 0.08   | -2.08 | 4.74E-02 | 5.47E-01 |
| Mark4         | 10.85  | 7.87   | -0.50 | 4.75E-02 | 5.48E-01 |
| Arhgap35      | 71.80  | 61.86  | -0.25 | 4.76E-02 | 5.49E-01 |
| Gk            | 1.07   | 1.67   | 0.62  | 4.77E-02 | 5.49E-01 |
| Rnf34         | 26.97  | 22.00  | -0.33 | 4.77E-02 | 5.50E-01 |
| Gm5510        | 2.22   | 0.81   | -1.48 | 4.78E-02 | 5.51E-01 |
| Insm1         | 2.46   | 3.94   | 0.65  | 4.79E-02 | 5.51E-01 |
| Lrrc10b       | 12.04  | 8.40   | -0.56 | 4.79E-02 | 5.51E-01 |
| Mir9-3hg      | 2.41   | 3.73   | 0.60  | 4.80E-02 | 5.51E-01 |
| Gria1         | 83.03  | 69.45  | -0.30 | 4.81E-02 | 5.51E-01 |
| 5730522E02Rik | 1.04   | 1.69   | 0.67  | 4.81E-02 | 5.51E-01 |
| Alg1          | 4.05   | 2.86   | -0.53 | 4.82E-02 | 5.52E-01 |
| Cacna1h       | 3.16   | 2.54   | -0.35 | 4.85E-02 | 5.53E-01 |
| Ppp1r11       | 32.48  | 26.82  | -0.31 | 4.84E-02 | 5.53E-01 |
| Dsc3          | 0.33   | 0.65   | 0.93  | 4.85E-02 | 5.53E-01 |
| Gm11966       | 299.19 | 395.89 | 0.38  | 4.85E-02 | 5.53E-01 |
| Gm12416       | 5.09   | 3.27   | -0.67 | 4.85E-02 | 5.53E-01 |
| Rpl6l         | 130.57 | 161.12 | 0.27  | 4.85E-02 | 5.53E-01 |
| Ppig          | 15.25  | 19.77  | 0.34  | 4.86E-02 | 5.54E-01 |

|          |        |        |       |          |          |
|----------|--------|--------|-------|----------|----------|
| Pianp    | 59.28  | 48.05  | -0.34 | 4.87E-02 | 5.55E-01 |
| Prlr     | 0.71   | 0.49   | -0.56 | 4.88E-02 | 5.55E-01 |
| Rprd2    | 16.30  | 13.81  | -0.27 | 4.88E-02 | 5.55E-01 |
| Rad54l2  | 3.43   | 2.67   | -0.40 | 4.89E-02 | 5.55E-01 |
| Fam98c   | 2.72   | 1.71   | -0.71 | 4.89E-02 | 5.56E-01 |
| Bbs4     | 13.80  | 18.13  | 0.36  | 4.91E-02 | 5.57E-01 |
| Tbkbp1   | 2.21   | 1.43   | -0.66 | 4.91E-02 | 5.57E-01 |
| Lrp3     | 5.99   | 4.54   | -0.44 | 4.92E-02 | 5.57E-01 |
| Vcam1    | 0.93   | 0.12   | -3.02 | 4.94E-02 | 5.57E-01 |
| Cap1     | 43.03  | 36.76  | -0.26 | 4.93E-02 | 5.57E-01 |
| Ndufb11  | 111.48 | 136.15 | 0.26  | 4.93E-02 | 5.57E-01 |
| Resf1    | 5.20   | 4.10   | -0.38 | 4.92E-02 | 5.57E-01 |
| Tomm6    | 70.83  | 57.04  | -0.34 | 4.94E-02 | 5.57E-01 |
| Cep126   | 10.45  | 13.20  | 0.30  | 4.92E-02 | 5.57E-01 |
| Mir3082  | 61.54  | 38.11  | -0.72 | 4.94E-02 | 5.57E-01 |
| Erbin    | 1.42   | 0.89   | -0.70 | 4.95E-02 | 5.57E-01 |
| Cst3     | 83.16  | 69.57  | -0.29 | 4.95E-02 | 5.57E-01 |
| Ddx55    | 2.81   | 3.91   | 0.45  | 4.95E-02 | 5.57E-01 |
| Srsf5    | 36.46  | 31.14  | -0.26 | 4.99E-02 | 5.58E-01 |
| Noct     | 7.23   | 8.89   | 0.27  | 4.98E-02 | 5.58E-01 |
| Zfp106   | 44.08  | 38.28  | -0.24 | 4.97E-02 | 5.58E-01 |
| Epb41    | 0.38   | 0.64   | 0.72  | 4.99E-02 | 5.58E-01 |
| BC017158 | 1.32   | 0.85   | -0.67 | 4.97E-02 | 5.58E-01 |
| Kcnh3    | 4.19   | 2.95   | -0.55 | 4.99E-02 | 5.58E-01 |
| Spen     | 4.39   | 3.39   | -0.41 | 4.97E-02 | 5.58E-01 |
| Yipf6    | 14.59  | 12.14  | -0.30 | 4.99E-02 | 5.58E-01 |
| Ndfip2   | 6.29   | 7.88   | 0.29  | 4.98E-02 | 5.58E-01 |
| Gm10250  | 66.02  | 83.26  | 0.30  | 4.99E-02 | 5.58E-01 |
| Tipin    | 5.55   | 8.59   | 0.60  | 5.00E-02 | 5.58E-01 |
