# Supplementary material for: Identification of Neurensin-2 as a novel modulator of emotional behavior
Source: PubMed Central journal article supplement (PMC8505262; doi:10.1038/s41380-021-01058-5), 2021-03-19
Supplement: 41380_2021_1058_MOESM4_ESM.pdf [file 41380_2021_1058_MOESM4_ESM.pdf]

**Table S2: Genes that are changed in CCK-cKO and enriched in GAD2 cells**

changed+ enriched genes

854

|            |
|------------|
| Psma4      |
| Ppia       |
| Phax       |
| Spock2     |
| Rpl23a-ps3 |
| Psmg2      |
| Arhgap35   |
| Nrep       |
| Samd10     |
| Ccdc106    |
| Nos1       |
| Sod2       |
| Dusp26     |
| Ly6e       |
| Ccdc71     |
| Wls        |
| Fahd1      |
| Ap1s1      |
| Ptprs      |
| Tubb4b     |
| Lta4h      |
| Tk2        |
| Brms1l     |
| Ppp2ca     |
| Nts        |
| Tecr       |
| Scarb1     |
| Mrps33     |
| Elavl3     |
| AI593442   |
| Alg1       |
| Noct       |
| Lrrc20     |
| Rps6-ps2   |
| Chchd2     |
| Slc24a3    |
| Pld3       |
| Prkn       |
| Dhcr7      |
| Spata7     |
| Usp27x     |
| Eloc       |
| Alg8       |
| Vps39      |

|          |
|----------|
| Rpl6l    |
| Dyrk1b   |
| Mpc1     |
| Anks3    |
| Proser3  |
| Mbd1     |
| Atp6v0e2 |
| Smarcd3  |
| Cog8     |
| Rps27a   |
| Lamtor3  |
| Man1c1   |
| Rangap1  |
| Pcna     |
| Prn      |
| Rnf144b  |
| Pdha1    |
| Aktip    |
| Nat6     |
| Tomm7    |
| Dele1    |
| Lrrc4b   |
| Arl8a    |
| Ensa     |
| Caly     |
| Prpf39   |
| Rwdd1    |
| Rexo1    |
| Ap1p1    |
| Nt5dc2   |
| Pgbd5    |
| Tlcd1    |
| Naif1    |
| Lrrc75a  |
| Mdh1     |
| Smim26   |
| Cox6c    |
| Bend3    |
| Ap2a1    |
| Tmem59l  |
| Fam183b  |
| Cmpk1    |
| Foxp4    |
| Rnf34    |
| Disp2    |
| Eif1b    |
| Mef2c    |

|           |
|-----------|
| Nrsn2     |
| Tnr       |
| Thoc1     |
| Tmem254b  |
| Tiam2     |
| Chchd2-ps |
| Zic5      |
| Shisal1   |
| Clip2     |
| Cd59a     |
| Lancl3    |
| Copb2     |
| Plxnb2    |
| Zfp438    |
| Polr2a    |
| Psm2      |
| Tesk1     |
| Cox6c2    |
| Ggct      |
| Pop5      |
| Hdac9     |
| Atp6v0a1  |
| Ulk1      |
| Eif4e2    |
| Nkiras1   |
| Col4a2    |
| Atxn10    |
| Katna1    |
| Car11     |
| Celf5     |
| Por       |
| Grwd1     |
| Rbbp8     |
| Apc2      |
| Syvn1     |
| Igsf8     |
| Rabgef1   |
| Nabp2     |
| Utp14b    |
| Kin       |
| Hyou1     |
| Timp3     |
| Lsm2      |
| Shc4      |
| Slc15a3   |
| Sh3bgrl3  |
| Celsr2    |

|           |
|-----------|
| Stard3    |
| Rtraf     |
| Tmem214   |
| Mir686    |
| Bambi-ps1 |
| Ctnnb1    |
| H3f3a-ps2 |
| Rdh14     |
| Tyw5      |
| Jmjd8     |
| Brdt      |
| Cpt1c     |
| Btbd1     |
| Ift43     |
| Fam219aos |
| Vti1b     |
| Tada3     |
| Rpl36a    |
| Cox17     |
| Erg28     |
| Aip       |
| Paqr7     |
| Fkbp3     |
| Krcc1     |
| Bend5     |
| Prpf8     |
| Creld1    |
| Cbarp     |
| Atn1      |
| Gcn11     |
| Ppih      |
| Farp2     |
| Acat3     |
| Mrpl15    |
| Eef1b2    |
| Mon1a     |
| Sema6a    |
| Ppp1r15b  |
| Lin52     |
| Rpl27a    |
| Acsl1     |
| Agap2     |
| Setd1a    |
| Sec11c    |
| Ttbk1     |
| Ccna2     |
| Hnrnpul1  |

|               |
|---------------|
| Ly6h          |
| Rps24         |
| Cntnap1       |
| AF529169      |
| Ccdc159       |
| Hnrnpr        |
| E030024N20Rik |
| Srsf1         |
| Sap30         |
| H3f3c         |
| Ndufv2        |
| Tmem251       |
| Ndufaf5       |
| Slc25a22      |
| Dnajb6        |
| Adgr1         |
| Shld1         |
| Hist1h2bl     |
| Camsap3       |
| Preli1        |
| Tox3          |
| Tmem63c       |
| Dpf2          |
| Tipin         |
| Morn4         |
| Bcor          |
| Arpc1a        |
| Rps6          |
| Nova1         |
| Hist1h2bc     |
| Rps13-ps1     |
| Plcxd2        |
| Gal3st3       |
| Dlgap3        |
| Rpl9-ps7      |
| Arpc5l        |
| Chd3          |
| Atp5l-ps1     |
| Zmiz2         |
| Pdf           |
| Clcn7         |
| Emd           |
| Man2b1        |
| Zfp839        |
| Rpl30         |
| Fchsd1        |
| Rps6kb2       |

|            |
|------------|
| Mark2      |
| Rangrf     |
| Porcn      |
| Efnb3      |
| Trappc6b   |
| Ap4s1      |
| Cacnb3     |
| Rela       |
| Lpcat4     |
| Dcun1d5    |
| B2m        |
| Nrxn2      |
| Prrc2b     |
| Pp2d1      |
| Pianp      |
| Actg1      |
| Ptp4a3     |
| Rhno1      |
| Spin2c     |
| Gna11      |
| Ndufb11    |
| Pfdn4      |
| Zcrb1      |
| Mageh1     |
| Mpc1-ps    |
| Hcn3       |
| Rps15a-ps7 |
| Rassf3     |
| Prrt3      |
| Mpped2     |
| Cbx3       |
| Ndufa2     |
| Naca       |
| Tob1       |
| G6pc3      |
| Prr5       |
| Ajm1       |
| Zic4       |
| Id2        |
| Rai1       |
| Ubc        |
| Tubg2      |
| Rsrc1      |
| Micu3      |
| Wdr83os    |
| Ap5z1      |
| Palm       |

|           |
|-----------|
| Reep2     |
| Ankrd52   |
| Arhgap23  |
| Rars      |
| Cbln4     |
| Mrps23    |
| Ndufa6    |
| Kcnb1     |
| Adgrb1    |
| Swsap1    |
| Man2a2    |
| Shank3    |
| Mphosph8  |
| Ccndbp1   |
| Gapdh     |
| Rps13-ps2 |
| Tiparp    |
| Atp2b2    |
| Shisa7    |
| Atxn7l2   |
| Fjx1      |
| Rack1     |
| Igln5     |
| Lrrtm1    |
| Ighm      |
| Elfn2     |
| Sdf2l1    |
| Wiz       |
| Cnm1      |
| Mipep     |
| Dctn1     |
| Grik5     |
| Cbx3-ps7  |
| Zbed5     |
| Vps25     |
| Rps27l    |
| Eif3f     |
| Ifngr2    |
| Rps13     |
| Camkk2    |
| Bcl9l     |
| Slc8a3    |
| Mgat5     |
| Tsc22d3   |
| Vsnl1     |
| BC017158  |
| Dcaf15    |

|              |
|--------------|
| Zfp710       |
| Oprm1        |
| Cbx6         |
| Tppp3        |
| Mlec         |
| Zfp462       |
| Mrpl18       |
| Rpl23a       |
| Hist1h2bn    |
| Ist1         |
| Coro1a       |
| Tomm6os      |
| Caskin1      |
| Gpr108       |
| Mrps12       |
| C2cd2l       |
| Rpp38        |
| Rnf220       |
| Micall1      |
| Pin4         |
| Rchy1        |
| Neurl1a      |
| Ncdn         |
| Psmb1        |
| Pom121       |
| Slc35a4      |
| Ezh1         |
| Sox11        |
| Vars2        |
| Rasgrp4      |
| Coprs        |
| Mark4        |
| Suv39h2      |
| Prrt1        |
| Adam15       |
| Pabpc1l2b-ps |
| Tpd52l1      |
| Ndufa4       |
| Cacna1a      |
| Rbfox2       |
| Scrt2        |
| Zfp574       |
| Ctsl         |
| Hdac5        |
| Selenow      |
| Yeats2       |
| Ndufb5       |



|           |
|-----------|
| Basp1     |
| Dad1      |
| Amigo1    |
| Lypd6     |
| Necab1    |
| Smim27    |
| Hmgn1     |
| Jag2      |
| Polr1a    |
| Kif1a     |
| Nifk      |
| Atp5f1    |
| Egln2     |
| Tusc1     |
| Higd1a    |
| Seh1l     |
| Chtf8     |
| Atpaf1    |
| Hsd3b7    |
| Abcg4     |
| Atf4      |
| Ric8a     |
| Rnasek    |
| Sec22a    |
| Rps13-ps4 |
| Pcdhb12   |
| Tmem268   |
| Syngap1   |
| Ndst1     |
| Bbs4      |
| Mir9-3hg  |
| Ell3      |
| Rps6-ps4  |
| Usf1      |
| Myo19     |
| Adcy5     |
| Fam98c    |
| Scap      |
| Sc5d      |
| Ufc1      |
| Zfp14     |
| Pde4a     |
| Ccdc97    |
| Shank1    |
| Sh2b1     |
| Mak16     |
| Trim65    |

|              |
|--------------|
| Pex6         |
| Zc3h3        |
| Galnt16      |
| Tank         |
| Pabpc1l2a-ps |
| Scrg1        |
| Ddx55        |
| Orc2         |
| Rps15a-ps6   |
| Ranbp1       |
| Naga         |
| Ptms         |
| Dolpp1       |
| Rpl12        |
| Fam166a      |
| Cetn4        |
| Tuba1c       |
| Scaf11       |
| Frg2f1       |
| Cyb5r3       |
| Blvrb        |
| Alg11        |
| Tmem38b      |
| Grm4         |
| Tom1l2       |
| Lgi3         |
| Etfa         |
| Cend1        |
| Pnma3        |
| Tomm6        |
| Rac3         |
| Mpp2         |
| Peg10        |
| Pnkd         |
| Cep126       |
| Eif3h        |
| Tmem254a     |
| Zfp277       |
| Aif1         |
| Syt9         |
| Bex4         |
| Ldb3         |
| Cops4        |
| Uqcrb        |
| Rps6-ps3     |
| Tedc2        |
| Nab2         |

|               |
|---------------|
| Serpinb6a     |
| Scaf1         |
| Coq6          |
| Mrps27        |
| Tpt1-ps3      |
| Ttc9b         |
| Msrb2         |
| Tspyl3        |
| Tnk2          |
| Eid2          |
| Mkks          |
| Grin1         |
| Gpx4          |
| Rptor         |
| Timm9         |
| Katnb1        |
| Hmgxb3        |
| Eif6          |
| NA            |
| Dcp1b         |
| Nfs1          |
| D630044L22Rik |
| Sf3b4         |
| Tbkbp1        |
| Pcnx2         |
| Sall2         |
| Rpl9          |
| Apopt1        |
| Adh5          |
| Tubb4a        |
| Cluh          |
| S100a6        |
| Rps20         |
| Rusc2         |
| Gspt2         |
| Tmem63b       |
| Syt3          |
| Slc35e2       |
| Mrfap1        |
| Bbip1         |
| Pcgf5         |
| Celsr3        |
| Stk32c        |
| Fam216a       |
| Cln3          |
| Tmem255a      |
| Rpa3          |

|           |
|-----------|
| Arhgdia   |
| Slc6a11   |
| Toe1      |
| Afap1     |
| Bud31     |
| Gabra3    |
| Grina     |
| Magee2    |
| Hmg20a    |
| Tmem231   |
| Cox16     |
| Kiz       |
| Gtpbp2    |
| Slc29a3   |
| Dmac1     |
| Creb3l1   |
| Atp5g1    |
| Dck       |
| Map10     |
| Oaz1-ps   |
| Fam204a   |
| Mcrip1    |
| Ndfip2    |
| Timm13    |
| Atp1a3    |
| Mettl3    |
| Chkb      |
| Nxt1      |
| Commd7    |
| Kdelr2    |
| Rapgef1   |
| Gnl1      |
| Bcr       |
| Tab1      |
| Rprd2     |
| Ppa1      |
| Chchd7    |
| Uqcrrs1   |
| Fndc10    |
| Gabarapl2 |
| Atp9a     |
| Gpr88     |
| Wdtd1     |
| Rps6-ps1  |
| Kcnc3     |
| Nsmce4a   |
| Nacc1     |

|           |
|-----------|
| Rammet    |
| Slc4a3    |
| Snapc1    |
| B4galnt1  |
| Lgmn      |
| Meis3     |
| Zfp141    |
| Ncor2     |
| Cluap1    |
| Dennd1a   |
| Hsbp1l1   |
| Ppp1r9b   |
| Adpgk     |
| Nipal3    |
| Kcnn3     |
| Mef2d     |
| Prss23os  |
| Pisd-ps1  |
| Mrpl21    |
| Prkaca    |
| Sigmar1   |
| Myo16     |
| Pagr1b    |
| Nfasc     |
| Sez6l     |
| Nlgn3     |
| Slc5a2    |
| Htr1a     |
| Trerf1    |
| Fam222b   |
| Celf3     |
| Htatsf1   |
| Pcmt1     |
| Gins2     |
| Kctd17    |
| Nudt16l1  |
| Arfgef2   |
| Snhg6     |
| Hist1h2bk |
| Ccdc65    |
| Zfp653    |
| Zfp84     |
| Nucb1     |
| Sgms1     |
| Ubb       |
| B3gat3    |
| Gemin6    |

|           |
|-----------|
| Ncam1     |
| Golga5    |
| Adss      |
| Zcwpw1    |
| D10Jhu81e |
| Tmem164   |
| Ehd4      |
| Arpc4     |
| Trp53i11  |
| Per1      |
| Etfrf1    |
| Tbc1d9    |
| Numbl     |
| Sspl3     |
| Snrpa     |
| Polr2k    |
| Ganab     |
| Bahcc1    |
| Fbxo9     |
| Rheb      |
| Ndufa5    |
| Prrc2a    |
| Lrch4     |
| Edf1      |
| Ramp2     |
| Fam45a    |
| Cfap36    |
| Zfp423    |
| Mrps30    |
| Ppp1r11   |
| Txnrd2    |
| Gng10     |
| Pip4k2b   |
| Zrsr1     |
| Gse1      |
| Ilkap     |
| Manbal    |
| Sf3a2     |
| Gria1     |
| Pdcd2l    |
| Cdk16     |
| Tmem269   |
| Ubald1    |
| Sorcs2    |
| Prpf40b   |
| Grin1os   |
| Iqsec2    |

|          |
|----------|
| Casp1    |
| Capn5    |
| Lrp8     |
| Gsk3a    |
| Tmem132a |
| Cbx3-ps6 |
| Cnot8    |
| Dcakd    |
| Zcchc2   |
| Vps72    |
| Capn15   |
| Grm1     |
| Gimp     |
| Gns      |
| Wnk2     |
| Atp6v0c  |
| Sdhaf2   |
| Pacs2    |
| Arpc1b   |
| Mink1    |
| Fam110a  |
| Rpl13    |
| Rad23b   |
| Zfp691   |
| Phf1     |
| Slc9a1   |
| Sh3bp1   |
| Zfp993   |
| Abca2    |
| Sik3     |
| Mocs2    |
| Tra2a    |
| Ing2     |
| Eif5a    |
| Hcn2     |
| Rogdi    |
| Gabarap  |
| Cacng8   |
| Atpif1   |
| Arg2     |
| Tenm1    |
| Hars     |
| Mbd6     |
| Rgs2     |
| Rnaseh1  |
| Ttll3    |
| Nova2    |

|           |
|-----------|
| Cst3      |
| Lrguk     |
| Sarnp     |
| Slc35c2   |
| Psm14     |
| Mpc2      |
| Nap15     |
| Slc39a9   |
| Haus3     |
| Tpd52     |
| Psma7     |
| Syt6      |
| Nemf      |
| Rab5a     |
| Blcap     |
| Mmp24     |
| Plbd2     |
| Pak1ip1   |
| Mrps35    |
| Ctsd      |
| Atp5mpl   |
| Scfd1     |
| Map3k15   |
| Cacna1g   |
| Rrbp1     |
| Sema6c    |
| Nup88     |
| Selenom   |
| Clcn6     |
| Slc25a4   |
| Nat8l     |
| Dek       |
| Zdhhc14   |
| Tpt1      |
| Inpp5j    |
| Tmem248   |
| Abhd14b   |
| Hid1      |
| Zhx3      |
| Rpl13-ps3 |
| Scg5      |
| Zscan29   |
| Maz       |
| Arl4d     |
| Dynll1    |
| Snrpd2    |
| Afg3l1    |



|            |
|------------|
| Crtc1      |
| Gfm1       |
| Sox1ot     |
| Rps13-ps5  |
| Zfp991     |
| Cetn3      |
| Cap1       |
| Stub1      |
| Has3       |
| Cry1       |
| Fam69b     |
| Sec61b     |
| Glr5       |
| Extl3      |
| Klc2       |
| Rell2      |
| Sema4f     |
| Thy1       |
| Zfp628     |
| Mir3082    |
| Tmem254c   |
| L1cam      |
| Psm12      |
| Pex7       |
| Tmem126a   |
| Fbxw17     |
| Rpl22l1    |
| Cnpy3      |
| Cox14      |
| Vps52      |
| Rnf7       |
| Phyhip     |
| Fam96a     |
| Ube2e1     |
| Rps27a-ps2 |
| Bex2       |
| Preb       |
| Srsf5      |
| Nol7       |
| Cnbp       |
| Atg7       |
| Fbxw5      |
| Lurap1l    |
| Mospd3     |
| Htra2      |
| BC024978   |
| Rps15a-ps5 |

|           |
|-----------|
| Grk2      |
| Lsm12     |
| Tubb2a    |
| Tmem160   |
| Thyn1     |
| Cnih2     |
| Ankrd34a  |
| Prr12     |
| Fscn1     |
| Psene1    |
| Lrrfip2   |
| Stpg1     |
| Lrp3      |
| Magi3     |
| Paqr4     |
| Ciz1      |
| Eno2      |
| Tmem201   |
| Tbca      |
| Sbf1      |
| Lix1l     |
| BC052040  |
| Lynx1     |
| Camta2    |
| Ndufb6    |
| Kdm6b     |
| Spen      |
| Gas5      |
| Znf41-ps  |
| Ptpn      |
| Cfap20    |
| Fancg     |
| Pfn2      |
| Bsg       |
| Grb10     |
| Fam174a   |
| Ddx47     |
| Scrt1     |
| Faim2     |
| Gmpr2     |
| Ndufa12   |
| Anxa5     |
| Ube2s     |
| Atp5g3    |
| Tnrc18    |
| Incenp    |
| Hist3h2ba |

enriched in GAD2

7768

|            |
|------------|
| Wdr6       |
| Mir6236    |
| Sez6l2     |
| Csnk1g2    |
| Trim46     |
| Syp        |
| Cdh24      |
| Actr1b     |
| Dctd       |
| Pxmp4      |
| Vmac       |
| Tnfrsf13b  |
| Sergef     |
| Nutf2-ps2  |
| Dhx9       |
| Ssu72      |
| Ruvbl2     |
| Eif2b2     |
| Dcun1d2    |
| Hebp2      |
| Cep290     |
| Ifrd2      |
| Setd6      |
| Polr3c     |
| Ube2d-ps   |
| Pex19      |
| Eif5a13-ps |
| Bnip3l     |
| Shc2       |
| Capzb      |
| Fam205a4   |
| Trmt5      |
| Akr1e1     |
| Snip1      |
| Npy        |
| B9d2       |
| Ap5s1      |
| Zfp119b    |
| Atp13a1    |
| Rplp2      |
| Hmgn3      |
| Snhg4      |
| Gpn3       |
| Ttll11     |
| Chrna1os   |
| 11-Sep     |
| Mettl22    |

|            |
|------------|
| Adrb1      |
| Med4       |
| Hprt       |
| Tigar      |
| Mief1      |
| Gtf2e2     |
| Triqk      |
| Ano2       |
| Ccl19-ps1  |
| Tango2     |
| Kcnh1      |
| Htr5a      |
| Rnf115     |
| Neil1      |
| Hdgf       |
| Chst12     |
| Lzts1      |
| Vash2      |
| Pitpnm3    |
| C1qtnf4    |
| Dnajc19-ps |
| Sowahc     |
| Nup188     |
| Pqlc2      |
| Rpl35a-ps2 |
| Grk5       |
| Peli3      |
| Alkal2     |
| Pmm1       |
| Pithd1     |
| Pgap2      |
| Dnajc11    |
| Def8       |
| Slc35e3    |
| Ncoa4      |
| Mrps9      |
| Coch       |
| Sharpin    |
| Pbx4       |
| Nup210     |
| Retreg3    |
| Tcea2      |
| Mad111     |
| Sgk1       |
| Aig1       |
| Tmsb10     |
| Atp6v1e1   |

|               |
|---------------|
| Mir8101       |
| D430042O09Rik |
| Spata24       |
| Sufu          |
| Hsf4          |
| Asap1         |
| Zscan22       |
| Pcbd2         |
| Emsy          |
| Rpl37         |
| Dda1          |
| Armcx2        |
| Ube4bos1      |
| Otud5         |
| Mzt2          |
| Rps11-ps2     |
| Flywch1       |
| Apex1         |
| Eef1g         |
| Rad51d        |
| Cacfd1        |
| Vamp2         |
| Grem2         |
| Taf5l         |
| Nop9          |
| Rps24-ps3     |
| Rbbp6         |
| Gbf1          |
| Cinp          |
| Ndufs4        |
| Nln           |
| Fam117b       |
| Mrpl38        |
| Ubr3          |
| Dnajc7        |
| Ii4i1         |
| Pi4k2a        |
| Aimp1         |
| Rpl24         |
| Phospho1      |
| Mrpl48        |
| Mlf2          |
| Khdrbs3       |
| Zfp703        |
| Fam207a       |
| Larp7         |
| Gbe1          |

|           |
|-----------|
| Aida      |
| Rnaset2b  |
| Trmt9b    |
| Hs3st1    |
| Dcaf4     |
| Cmtr2     |
| Zbtb22    |
| Zfp677    |
| Cntd1     |
| Zfp558    |
| Tysnd1    |
| Rusc1     |
| C1qbp     |
| Rasgrp2   |
| Eed       |
| Agpat3    |
| Zfp362    |
| Mpv17l    |
| Icmt      |
| Eef1d     |
| Rgl1      |
| Msl3l2    |
| Cpxm1     |
| Cd33      |
| Lph       |
| Trbj2-3   |
| Ocrl      |
| Stn1      |
| D11Wsu47e |
| Ppp2r5b   |
| Rbm48     |
| Ckb       |
| Rpl27     |
| Usp13     |
| Tmem196   |
| Hist1h1a  |
| Coa4      |
| Tusc3     |
| Thumpd2   |
| Caprin1   |
| Cops9     |
| Zcchc18   |
| Ndufb3    |
| Plpp7     |
| Rtf1      |
| Dab2ip    |
| Senp3     |

|           |
|-----------|
| Pex11a    |
| Cab39l    |
| Tomm40    |
| Dxo       |
| Zdhhc16   |
| Mrpl1     |
| Pim3      |
| C1qtnf1   |
| Cbll1     |
| Ube2m     |
| Trim24    |
| Pla2g12a  |
| Pf4       |
| Bcat1     |
| Rps19-ps2 |
| Cox7b     |
| Tecpr1    |
| Npm1      |
| Mboat7    |
| Bicd2     |
| Ppm1h     |
| Gclm      |
| Ran       |
| Cep63     |
| Rgmb      |
| Mtus2     |
| Tars2     |
| Dbndd1    |
| Grik3     |
| Mir7225   |
| Mcat      |
| Crtac1    |
| Gcdh      |
| Ddah2     |
| Calr      |
| Dmap1     |
| Rufy1     |
| Wasf3     |
| Vsir      |
| Dpy19l1   |
| Cipc      |
| Hist1h2bq |
| Csnk2b    |
| Nop56     |
| Zhx1      |
| Sfrp1     |
| Tuba8     |

|           |
|-----------|
| Suclg1    |
| Prss36    |
| Rpl34-ps1 |
| Xkr4      |
| Isca2     |
| Heca      |
| Paf1      |
| Spats1    |
| Sil1      |
| Fam222a   |
| Tmco1     |
| E2f5      |
| Qtrt1     |
| Fam89b    |
| Fam171a2  |
| Ostc      |
| Avpr1a    |
| Rbm43     |
| Got1      |
| Zfp28     |
| Zfp688    |
| Nelfa     |
| Efs       |
| Srp68     |
| Zbtb17    |
| Akr1c18   |
| Pgm2      |
| Ldah      |
| Gpr3      |
| Gpr137    |
| Zfp760    |
| Tut1      |
| Qrs1      |
| Tpr       |
| Fam241b   |
| Rybp-ps   |
| Atat1     |
| Stam      |
| Selenop   |
| Gng5-ps   |
| Lsm10     |
| Trafd1    |
| Crip2     |
| Cacng2    |
| Tfb1m     |
| Hist1h3c  |
| Tmem192   |



|            |
|------------|
| Dok7       |
| Zfp64      |
| Srsf3      |
| Prepl      |
| Kcnk6      |
| Hist1h4i   |
| Mir6537    |
| Otud6b     |
| Kbtbd4     |
| Elmo1      |
| B4galnt4   |
| Arl6ip5    |
| Rab2b      |
| Mrps26     |
| Gga3       |
| Prokr2     |
| Dedd       |
| Polr2c     |
| Oser1      |
| Tmem47     |
| Ccdc28b    |
| Hbs1l      |
| Mir6972    |
| Cdca7      |
| Wdr47      |
| Ptpn23     |
| Srprb      |
| Agri       |
| Txndc15    |
| Rps15a-ps2 |
| Ptpn11     |
| Slc5a5     |
| Ctdnep1    |
| Fam220a    |
| Spry2      |
| Rexo2      |
| Cyp2t4     |
| Zik1       |
| Eif3g      |
| Lig1       |
| Pqbp1      |
| Msh6       |
| Mir7082    |
| Bean1      |
| Nkrf       |
| Camta1     |
| Mir1896    |

|           |
|-----------|
| Cux1      |
| Cacna2d3  |
| Hmgn2-ps1 |
| Tomm22    |
| Magee1    |
| Smyd3     |
| Hist1h2ae |
| Gtpbp1    |
| Sp4       |
| Mrpl48-ps |
| Snap47    |
| Borcs6    |
| Snhg12    |
| Aldoart1  |
| Zfp386    |
| Nol10     |
| Cox15     |
| AW549877  |
| Coro1b    |
| Pdgfa     |
| Uba1      |
| Pcsk4     |
| Atp6ap1   |
| Mcrip2    |
| Rabl2     |
| Ngf       |
| Fam118b   |
| Ttc39aos1 |
| Tsen34    |
| St8sia3os |
| Maip1     |
| Fam3c     |
| Itgb2     |
| Hist1h2an |
| Zfp513    |
| Ostm1     |
| Ndn       |
| Dhdds     |
| Smu1      |
| Man1a2    |
| Samhd1    |
| Pde4d     |
| Nubp1     |
| Tbc1d22a  |
| Slc25a25  |
| Pomc      |
| Nhlrc1    |

|             |
|-------------|
| Nkiras2     |
| Copg2       |
| Galk1       |
| Bax         |
| Ube2d2a     |
| Nsdhl       |
| Mthfd1      |
| Ptchd4      |
| Ints1       |
| Psm5        |
| Pank1       |
| Galnt7      |
| Dpp3        |
| Tspan31     |
| Morc2a      |
| Pak3        |
| Krt1        |
| Bclaf1      |
| Amdhd2      |
| Scyl1       |
| Elmod3      |
| D8Erttd738e |
| Mfsd3       |
| Iffo2       |
| Dmtf1       |
| Rims3       |
| Tmem86a     |
| Ik          |
| Josd1       |
| Cpne2       |
| Hspa12b     |
| Mir3113     |
| Zdhc9       |
| Wdr83       |
| Nrm         |
| Nxt2        |
| Cenps       |
| Chmp2a      |
| Dnase1      |
| Zfand1      |
| Htatip2     |
| Rnf208      |
| H2afy       |
| Abtb1       |
| Polr2l      |
| Gla2        |
| Arhgef1     |

|            |
|------------|
| Pgrmc2     |
| Poldip2    |
| Map4k2     |
| Pbdc1      |
| Meis2      |
| Cdkn2aipnl |
| Slc7a10    |
| Robo2      |
| Fzd1       |
| Epm2a      |
| Lhfp15     |
| Mir7078    |
| Gtf3c1     |
| Aifm1      |
| Ccnc       |
| Thoc7      |
| Numb       |
| P2ry12     |
| Frmpd4     |
| Necap1     |
| Alg14      |
| Nom1       |
| Tkfc       |
| Mir700     |
| Jade1      |
| Nat8f1     |
| Cdpf1      |
| Tbc1d30    |
| Taf12      |
| Npas3      |
| Fpgt       |
| Lenep      |
| Tubb3      |
| Dtd1       |
| Clptm1     |
| Sox15      |
| Wdr92      |
| Srek1ip1   |
| Nt5c       |
| Arhgdib    |
| Tmem179    |
| Leo1       |
| Rps12-ps3  |
| Ints8      |
| Apbb1ip    |
| Stx6       |
| Wdr36      |

|           |
|-----------|
| Alkbh6    |
| Afdn      |
| Morf4l1   |
| Fam104a   |
| Sgcz      |
| Slc38a10  |
| Pigz      |
| Rtp4      |
| Uprt      |
| Tnfsfm13  |
| Taf9b     |
| Epha5     |
| Plekhj1   |
| Prkcz     |
| Txnl1     |
| Panx2     |
| Hira      |
| Arfgap1   |
| Plekhm2   |
| Psm10     |
| Zfp57     |
| Pgk1-rs7  |
| Pphl1     |
| Polr2m    |
| Eps8      |
| Akip1     |
| Rgs16     |
| Dcst1     |
| Dazap2    |
| Hspe1-ps3 |
| Ccdc189   |
| Rpf1      |
| Prdm16    |
| Mapkbp1   |
| Mettl2    |
| Zfp791    |
| Clcn4     |
| Phf7      |
| Ndr4      |
| Tyw3      |
| Fancf     |
| Acaa1b    |
| Dip2c     |
| Zfp668    |
| Snd1      |
| Snapc4    |
| Nacc2     |

|               |
|---------------|
| Men1          |
| Klh13         |
| Cand1         |
| Hspa5         |
| Atg5          |
| Zscan2        |
| Rab7          |
| Hnrnpa1l2-ps2 |
| Mta2          |
| Sbk1          |
| Pts           |
| Fmo1          |
| Cdc123        |
| Frg1          |
| Gng3          |
| Rabggtb       |
| Slc12a6       |
| Mmadhc        |
| 5-Sep         |
| Exo5          |
| Mybbp1a       |
| Tnfrsf12a     |
| Ints11        |
| Mapt          |
| Cndp2         |
| At11          |
| Map7d1        |
| Arhgap6       |
| Cryz          |
| Ammecr1l      |
| Cdk10         |
| Ppa2          |
| Rnf103        |
| Gp1bb         |
| Tmem39b       |
| St6gal2       |
| Pigs          |
| Cacng3        |
| Lias          |
| Ipo13         |
| Bcap31        |
| Nploc4        |
| Mettl26       |
| Eri3          |
| Tollip        |
| Smg5          |
| Rab3b         |

|            |
|------------|
| Zcchc12    |
| H6pd       |
| Alg10b     |
| Cox7a2     |
| Sec61g     |
| Midn       |
| Zscan18    |
| Ss18l2     |
| Pomgnt2    |
| Jmy        |
| Smarca2    |
| Faiml      |
| Retsat     |
| Ppp2r1a    |
| Wdr34      |
| Nudt10     |
| Rps15a-ps3 |
| Large1     |
| Gpr62      |
| Mien1      |
| Pgf        |
| Gpn2       |
| Nol4       |
| Pld5       |
| Mcee       |
| Enkd1      |
| Pdcd10     |
| Efcab10    |
| Upf3a      |
| Tmed7      |
| Kcnq2      |
| Lgi2       |
| Cplx3      |
| Hsd17b10   |
| Trappc4    |
| Kif21a     |
| Pgam1-ps2  |
| Nek7       |
| Cdipt      |
| Sqle       |
| Rps18-ps3  |
| Fkbp8      |
| Acsl3      |
| Isoc2b     |
| Rnf214     |
| Pramef8    |
| Sumf1      |

|               |
|---------------|
| Ak1           |
| Rpl18-ps2     |
| Slc32a1       |
| Fam8a1        |
| B630019K06Rik |
| Mgme1         |
| Sumf2         |
| Mat2b         |
| Igsf11        |
| Pcdh9         |
| Recql         |
| Idh3b         |
| Amz2          |
| Gstp2         |
| Cct8          |
| Phlda3        |
| Rpain         |
| Ring1         |
| Map3k13       |
| Neurl4        |
| Mrs2          |
| Khsrp         |
| Pa2g4         |
| Trp53inp2     |
| Grtp1         |
| Sdhaf3        |
| Pym1          |
| Sh2b3         |
| Pole4         |
| Rmc1          |
| Pnpla2        |
| Cep104        |
| Rabif         |
| Gpi1          |
| Cnot11        |
| Cavin3        |
| Wdyhv1        |
| Khyn          |
| Abhd14a       |
| Sys1          |
| Abcb8         |
| Znrf1         |
| Pcif1         |
| Selenov       |
| Pcdh17        |
| Minos1        |
| Jsrp1         |



|            |
|------------|
| Gdpd1      |
| Znrf2      |
| Rps2       |
| Tmem151a   |
| Shf        |
| Glrx3      |
| Taok2      |
| Hagh       |
| Tspan4     |
| Nbdy       |
| Pigq       |
| Mapre2     |
| Hax1       |
| Matr3      |
| Dlx6os1    |
| Brd1       |
| Tmem38a    |
| AW822252   |
| Galnt11    |
| Hist2h2ab  |
| Tctn2      |
| Rps7       |
| Sh3glb2    |
| Fbxl16     |
| Ccdc91     |
| Kif2a      |
| Dcaf11     |
| Arrb1      |
| Mthfsd     |
| Gnl2       |
| Aga        |
| Ociad1     |
| Eif3b      |
| Thap11     |
| Ppp2r2c    |
| Acox3      |
| Crnk1l1    |
| Cpe        |
| Igfbp5     |
| Ptdss2     |
| Nphp1      |
| Fam50a     |
| Zc3h6      |
| Alg12      |
| Actr1a     |
| Rpl18a-ps1 |
| Rab11a     |

|            |
|------------|
| Rnf167     |
| Gorab      |
| Tmem106c   |
| Dmrtc1a    |
| Gon7       |
| Dap3       |
| Sema4g     |
| Rwdd2a     |
| Cdv3       |
| Gstt1      |
| Prdx3      |
| Limk1      |
| Tstd3      |
| Lrrc73     |
| Lancl1     |
| Zfp414     |
| Eif2s2     |
| Prkar2a    |
| Desi2      |
| Hnrnpa2b1  |
| Rab33b     |
| Zfp524     |
| Nudcd2     |
| Adap1      |
| Pias4      |
| Cops3      |
| Fam32a     |
| Slc45a4    |
| Zfp661     |
| Rcc1       |
| Rpl31-ps18 |
| Rsl1       |
| Adar       |
| Tomm40l    |
| Nosip      |
| Dlg5       |
| Xrcc4      |
| Serhl      |
| Ndufb7     |
| Vamp7-ps   |
| Plvap      |
| Stk25      |
| Pex3       |
| Rps12-ps20 |
| Klhdc9     |
| Tpm2       |
| Spi1       |

|           |
|-----------|
| Trpt1     |
| Nsun3     |
| Snrpa1    |
| Hist1h2ag |
| Adcy3     |
| Tomm34    |
| Fabp3-ps1 |
| Tmem5     |
| Rpl17-ps8 |
| Ppfia4    |
| Pstk      |
| Ccar1     |
| Abracl    |
| Rnf44     |
| Ggact     |
| Ube2nl    |
| Lrp12     |
| Rpl29     |
| Parl      |
| Ndufaf7   |
| Prima1    |
| Gemin7    |
| Cyp4x1os  |
| Clic4     |
| Rad21     |
| Prep      |
| Galntl6   |
| Tgfb1i1   |
| Prmt7     |
| Fam149a   |
| Rab24     |
| Lysmd4    |
| Rtca      |
| Mir7029   |
| Lipe      |
| Cntrob    |
| AW551984  |
| Trpv2     |
| Dnaja2    |
| Cbln1     |
| Mir1895   |
| Fam43b    |
| Lsm6      |
| Kmt2b     |
| Utp11     |
| Hnrnpa0   |
| Dbnl      |

|           |
|-----------|
| Anapc5    |
| Dlk1      |
| Bex3      |
| Sybu      |
| Cyb5r4    |
| Gatc      |
| Msn       |
| Rraga     |
| Efna3     |
| Gtf2a2    |
| Dnajb4    |
| Nipsnap2  |
| Picalm    |
| Stx18     |
| Irgq      |
| Itga9     |
| Vdac1     |
| Sipa1l2   |
| Psmc5     |
| Coq7      |
| Ilf2      |
| Sesn3     |
| Zfp318    |
| Pigf      |
| Ankrd13c  |
| Selenoo   |
| Hspd1     |
| Bmper     |
| Ppif      |
| Srrm3     |
| Pheta1    |
| Fam206a   |
| Mcm7      |
| Ufl1      |
| Nup54     |
| Soga3     |
| Kdm1a     |
| Isyna1    |
| Hist1h3b  |
| Oxa1l     |
| Rpl28-ps1 |
| Stim1     |
| Nup107    |
| Glt8d1    |
| Stat5b    |
| Hmgn2     |
| Pcdhb13   |

|           |
|-----------|
| Reep6     |
| Atg10     |
| Tex264    |
| Tshb      |
| Hist1h2ap |
| Trub1     |
| Kars      |
| Nudt2     |
| Mrpl53    |
| Zfp969    |
| Babam1    |
| Rps16     |
| Taf5      |
| Atp5c1    |
| Mtmr2     |
| Cmc4      |
| Ubac1     |
| Terf1     |
| Gusb      |
| Hcfc1r1   |
| Dcun1d4   |
| Zfp874a   |
| Ralbp1    |
| Lin7a     |
| Trmt10c   |
| Mrpl54    |
| Morn2     |
| Reep1     |
| Ppp1r13b  |
| Grk3      |
| Tax1bp1   |
| Clasrp    |
| Got2-ps1  |
| Sec11a    |
| Mrpl12    |
| Tulp4     |
| Ecd       |
| S1pr3     |
| Drp2      |
| Atox1     |
| Mrm2      |
| Phactr3   |
| Slc25a27  |
| AI429214  |
| Pde5a     |
| Ctps2     |
| Fen1      |

|               |
|---------------|
| Crat          |
| Uba6          |
| Slc25a47      |
| Fundc1        |
| Crtc2         |
| Ttc30a1       |
| Rtl4          |
| Klhl11        |
| Kyat1         |
| Fsd1          |
| Atxn7l3       |
| Ptpn9         |
| Smim11        |
| Sh2d7         |
| Sar1a         |
| Trim12c       |
| Pxdc1         |
| Cadps2        |
| Rps26         |
| Dctn5         |
| Eaf1          |
| Chadl         |
| Tubg1         |
| Camkmt        |
| Gin1          |
| Asb6          |
| Syndig1       |
| Dolk          |
| Parp11        |
| Gsto1         |
| Nbn           |
| Ptpn18        |
| Sec61a1       |
| Spryd4        |
| Rfxap         |
| D030028A08Rik |
| Slc35f3       |
| Fam160a2      |
| Prune1        |
| Erp44         |
| Ndufb4c       |
| Ncoa2         |
| Mansc1        |
| Sult2b1       |
| Ubald2        |
| Fhod3         |
| Tigd2         |

|            |
|------------|
| Txn2       |
| Rrp12      |
| Fam98a     |
| Triap1     |
| Mcp1       |
| Iscu       |
| Hjurp      |
| Wdr24      |
| Cpsf6      |
| Rbm34      |
| Ece2       |
| Tfip11     |
| Ccdc47     |
| Rftn1      |
| Slitrk4    |
| Syce2      |
| Cops7a     |
| Ndufaf8    |
| Zfp771     |
| Vstm2a     |
| Slc6a1     |
| Tug1       |
| Kcnt1      |
| Gnb1       |
| Degs2      |
| Ndufs6     |
| Zfp652os   |
| Impact     |
| Ino80e     |
| Amd1       |
| Il34       |
| Rps12-ps13 |
| Nudt18     |
| Gdf10      |
| Rdh5       |
| Psme3      |
| Hdhd3      |
| Cthrc1     |
| Ebpl       |
| Rpl30-ps11 |
| Mhrt       |
| Elac1      |
| Smim19     |
| Ethe1      |
| Sbds       |
| Cit        |
| Daxx       |

|          |
|----------|
| Anxa3    |
| Tspyl2   |
| Klhl33   |
| Ctnnb1   |
| Pat1     |
| Rsl24d1  |
| Rxfp3    |
| Tagap    |
| Carmil3  |
| Acvr1b   |
| Ptov1    |
| Csnk1e   |
| N6amt1   |
| Mis12    |
| Dscaml1  |
| Chrm5    |
| Armcx4   |
| Pcsk6    |
| Trap1    |
| Pcbp1    |
| Epg5     |
| Dnaaf2   |
| Pde11a   |
| Nrg4     |
| Lrrc27   |
| Abcg1    |
| Krt10    |
| Atp23    |
| Hint2    |
| Atrip    |
| Cnm2     |
| Thoc3    |
| Stk33    |
| Hint3    |
| BC037034 |
| Prkaa1   |
| Btbd11   |
| Urgcp    |
| Fbxo22   |
| Cbx7     |
| Igbp1    |
| Rprd1b   |
| L3mbtl2  |
| Micu1    |
| Tmco3    |
| Strap    |
| Lsm14b   |



|         |
|---------|
| Zc3h14  |
| Crbn    |
| L3mbtl1 |
| Ngef    |
| Chmp6   |
| Brinp3  |
| Sh3kbp1 |
| Selenof |
| Wdr4    |
| Usp11   |
| Cfap69  |
| Haus7   |
| Lgalsl  |
| Nutf2   |
| Gadd45b |

D930015M05Rik

|           |
|-----------|
| Zfp367    |
| Smim10l2a |
| Myl12a    |
| Fbxo2     |
| Cntnap5a  |
| Rfx5      |
| Taf7      |
| Inpp4a    |
| Actl6b    |
| Trim26    |
| Cox10     |
| Pfdn2     |
| Sap18b    |
| Dnttip2   |
| Jund      |
| Ina       |
| Cfap126   |
| Zfp354b   |
| Ophn1     |
| Rnh1      |
| Mrps31    |
| Srcin1    |
| Smim24    |
| Abhd1     |
| Slc16a13  |
| Spa17     |
| Taf10     |
| Spg21     |
| Prkab1    |
| Tmem183a  |
| Ap2m1     |

|           |
|-----------|
| Sln       |
| Supt16    |
| E2f3      |
| Ncbp3     |
| Ints6     |
| Snx2      |
| Mrnip     |
| Ttc32     |
| Polr1d    |
| Papd5     |
| Cfl1      |
| Tmem200c  |
| Etv3      |
| Ufd1      |
| Pes1      |
| Zfp251    |
| Spef1     |
| Dclk2     |
| Rpl7      |
| Rbm45     |
| Skiv2l    |
| Zfp526    |
| Spindoc   |
| Amn       |
| Ppib      |
| Dnal4     |
| Zfp949    |
| Pitpnm1   |
| Pik3c3    |
| Commd2    |
| Ccdc120   |
| Id4       |
| Selenok   |
| Ctsh      |
| D3Ert751e |
| Cdad1     |
| Ankrd29   |
| Rcn2      |
| Prdx2     |
| Nat10     |
| Tbc1d12   |
| Sap30l    |
| Cwc27     |
| Chic2     |
| Cgrrf1    |
| Ermard    |
| Ncs1      |

|             |
|-------------|
| Olfml3      |
| Atp6v0c-ps2 |
| Tenm4       |
| Tfe3        |
| Gle1        |
| Dvl1        |
| Mcl1        |
| Nt5m        |
| Mrpl41      |
| Kcna2       |
| Rsph1       |
| Ptger1      |
| Rnf185      |
| Mir5132     |
| Cercam      |
| Clasp1      |
| Narf        |
| Scp2        |
| Bcl7c       |
| Sox1        |
| Prkrip1     |
| Map3k20     |
| Mrpl42      |
| Mapk3       |
| Vgf         |
| Hsp90b1     |
| Paxip1      |
| Nnt         |
| Cbr4        |
| Uckl1os     |
| Emc9        |
| Phf5a       |
| Srgap3      |
| Zfp811      |
| Rgp1        |
| Fam13c      |
| Arf4        |
| Rplp0       |
| Usp29       |
| Suds3       |
| Ivd         |
| Akap10      |
| Rpl39       |
| Rps19-ps5   |
| Fam205a2    |
| Dnase2a     |
| Zfyve9      |

|           |
|-----------|
| Tsfm      |
| Adra1b    |
| Frmd4a    |
| Agap3     |
| Xpo6      |
| Pex26     |
| Fbl1      |
| Rilpl2    |
| Tmem135   |
| Mrps7     |
| Hpgds     |
| Upf3b     |
| Tmem177   |
| Utp4      |
| Bach1     |
| Tamm41    |
| Calca     |
| Lzts3     |
| Flot2     |
| Rps8-ps1  |
| Tgfb3     |
| Myopos    |
| Zfp316    |
| Fstl5     |
| Bvht      |
| Fgf1      |
| Arhgap27  |
| Dbp       |
| Ebp       |
| Psmb5     |
| Ankra2    |
| Pam16     |
| Lonp2     |
| Spata13   |
| Rpl36-ps2 |
| Nectin4   |
| Gps2      |
| Vav2      |
| Rps6ka2   |
| Grk6      |
| Sfrp2     |
| Neto2     |
| Arhgef7   |
| Nup35     |
| Fam78b    |
| Tmem184b  |
| Aco2      |

|               |
|---------------|
| Asic1         |
| C920006O11Rik |
| Eloa          |
| Nrbp2         |
| Dmac2         |
| Rpl8          |
| Rab3il1       |
| Nog           |
| Pigx          |
| Abhd12        |
| Ap1g2         |
| Tmem14a       |
| Sap130        |
| Samd4         |
| Pam           |
| Epb41l4a      |
| Ano4          |
| H2afy2        |
| Gpr149        |
| Aldh3b2       |
| Pum3          |
| Krit1         |
| Ifi27         |
| Tmem161a      |
| Zfp511        |
| Arfp1         |
| Phyhipl       |
| Leng1         |
| Imp4          |
| Heatr5b       |
| Smarcc2       |
| Mrto4-ps2     |
| Rpl17-ps1     |
| Kcnf1         |
| Ostf1         |
| Zfp59         |
| Ebna1bp2      |
| Rps4l         |
| Coq10b        |
| Inip          |
| Bcam          |
| Gpatch3       |
| Xbp1          |
| Ktn1          |
| Ache          |
| Ntpcr         |
| Rpl19-ps11    |

|           |
|-----------|
| Ptbp2     |
| Slc6a8    |
| Nell1     |
| Dpp9      |
| Mthfd2l   |
| Birc2     |
| Smco4     |
| Zdhhc7    |
| Snrnp25   |
| Klf16     |
| D17Wsu92e |
| Ccni      |
| Shoc2     |
| Stk16     |
| Ndfip1    |
| Zfp623    |
| Lrrc3b    |
| Arhgef11  |
| Zmat3     |
| Adam19    |
| Fxyd6     |
| Bahd1     |
| St8sia6   |
| Ptpn2     |
| Ssb       |
| Alcam     |
| Col19a1   |
| Rnf180    |
| Lamp2     |
| Tdp2      |
| St8sia4   |
| H2-D1     |
| Retreg1   |
| Gtpbp3    |
| Fars2     |
| Meaf6     |
| Ube2v2    |
| Mxd3      |
| Galnt18   |
| Neu1      |
| Arhgef4   |
| Urb2      |
| Ubl7      |
| Csnk2a1   |
| Mettl1    |
| Ube2o     |
| Cplx1     |

|          |
|----------|
| Tmem70   |
| Gfod2    |
| Prdm11   |
| Grid2ip  |
| Epha3    |
| Nono     |
| Stx1b    |
| Stip1    |
| Ski      |
| Elmo2    |
| Aph1a    |
| Mturn    |
| Mir678   |
| Hyi      |
| Gid8     |
| Zfand6   |
| Gabbr2   |
| Ppm1f    |
| Dhx34    |
| Rasgef1c |
| Prkcsh   |
| Rtl8b    |
| Hexb     |
| Napa     |
| Nkapd1   |
| Agfg2    |
| R3hdm2   |
| Alox8    |

C530008M17Rik

|           |
|-----------|
| Gpr75     |
| Mir704    |
| Zscan25   |
| Eya4      |
| Atp2b4    |
| Tmem230   |
| Snrpert   |
| Mir6360   |
| Hmgb1     |
| Rpl30-ps8 |
| Avp       |
| Rnf149    |
| Rufy3     |
| Zfp583    |
| Smarcd1   |
| Zfp598    |
| Gpbp1l1   |
| Pbx2      |

|            |
|------------|
| Avl9       |
| Cltb       |
| Ppp2r5e    |
| Zfp729a    |
| Dnajc24    |
| Tmem163    |
| Fam167a    |
| Gnptab     |
| Serinc4    |
| Sumo2      |
| Prim1      |
| Snpc2      |
| St7l       |
| Cox20      |
| Mir682     |
| Rpl10      |
| Endod1     |
| Socs7      |
| H1f0       |
| Alkbh8     |
| Gpr39      |
| Gaa        |
| H2-M3      |
| Lrrc4      |
| Ddx20      |
| Rpp21      |
| Rpl35a-ps6 |
| Elavl4     |
| Zfp869     |
| Dkc1       |
| Slc39a11   |
| Pla2g15    |
| Tmem42     |
| Vstm5      |
| Mapk10     |
| Lrrc61     |
| Hgsnat     |
| Ccnd3      |
| Hist1h1d   |
| Ankrd13a   |
| Ripor1     |
| Raph1      |
| Unc80      |
| Mir1306    |
| Six3       |
| Mapkapk2   |
| Ywhaq-ps3  |



|              |
|--------------|
| U2af1        |
| Mrpl23       |
| Azin1        |
| Slc44a2      |
| Exoc7        |
| Rps12-ps19   |
| P4hb         |
| Yipf3        |
| Fcer1g       |
| Map2k7       |
| Ablim2       |
| Dok5         |
| Snrpb        |
| Gabarapl1    |
| Tmem68       |
| Itsn1        |
| Gpr135       |
| Ube2f        |
| Lair1        |
| Hnrnpa1l2-ps |
| Ufsp2        |
| Ogfod3       |
| Neurl2       |
| Impdh1       |
| Rbm15b       |
| Psap         |
| Prr13        |
| Frs3         |
| Thra         |
| Cers4        |
| Zfp764       |
| Sfxn4        |
| Alkbh2       |
| Slx4         |
| Psm3         |
| Gadl1        |
| Trir         |
| Spry4        |
| Fut8         |
| Egr2         |
| Cryba4       |
| Lasp1        |
| Rps12-ps24   |
| Rpl31-ps1    |
| Ptpmt1       |
| Dnajc9       |
| Rpl22        |

|            |
|------------|
| Stx1a      |
| Sntb1      |
| Copz1      |
| Wdr89      |
| Trdmt1     |
| Vdac3-ps1  |
| Spcs3      |
| Tmem9      |
| Kcmf1      |
| Hist1h2bj  |
| Tfpt       |
| Sec62      |
| Ppp1r2-ps4 |
| Pias2      |
| Ibtk       |
| Bckdk      |
| Chchd4     |
| Cdc26      |
| Tmem8b     |
| Rflnb      |
| Mtch2      |
| AW209491   |
| Erc1       |
| Rab1b      |
| Cntfr      |
| Lypd1      |
| Kifc2      |
| Ccs        |
| Syce1l     |
| Tceal9     |
| Tmem241    |
| Zfp553     |
| Mmachc     |
| Pcdhb8     |
| Atp5l      |
| Zfp52      |
| Tax1bp3    |
| Plcx3      |
| Arnt2      |
| Fndc3a     |
| Rps2-ps5   |
| Nt5c3b     |
| Med21      |
| Hivep1     |
| Fiz1       |
| Ckap5      |
| Rpl7a-ps5  |

|               |
|---------------|
| Rab35         |
| Rpl18         |
| Hgs           |
| Cnn2          |
| Inafm2        |
| Slc25a44      |
| Gfra4         |
| Zkscan1       |
| Fkbp14        |
| Apmap         |
| Ptn           |
| Rce1          |
| Lrfn3         |
| Acbd3         |
| Mir1901       |
| B430218F22Rik |
| Pafah1b2      |
| Crtap         |
| Rai2          |
| Cask          |
| B4galt7       |
| Syn3          |
| Gabrd         |
| Mir8094       |
| Rpl29-ps5     |
| Gnpda1        |
| Acox1         |
| Mgat3         |
| Grik2         |
| Rit2          |
| A1597479      |
| Fam161b       |
| Vkorc1        |
| Specc1        |
| Mycn          |
| Zfp444        |
| Tsc22d1       |
| Tspan6        |
| Zfp784        |
| Rad1          |
| Ppp2r2a       |
| Fam213a       |
| Dhrs13os      |
| Galnt13       |
| Pcdh10        |
| Edem2         |
| Stac2         |

|            |
|------------|
| Plpp4      |
| Ovca2      |
| Uckl1      |
| Rps3       |
| Dlx5       |
| Plcb4      |
| Reps2      |
| Wsb2-ps    |
| Qars       |
| Spred3     |
| Fxr1       |
| Endog      |
| Eif3i      |
| Tmem25     |
| Atp6v1c1   |
| Rbmxl1     |
| Plekha7    |
| Slc37a4    |
| Tspan7     |
| Kdelr1     |
| Brf1       |
| Tmx2       |
| Shd        |
| Prag1      |
| Wdr18      |
| Slc2a5     |
| Rpl31-ps10 |
| Mlx        |
| Celf4      |
| Polb       |
| Lamtor5    |
| Cep120     |
| Zfp212     |
| Bzw1       |
| Wdfy2      |
| Myo1h      |
| Lrp8os3    |
| Tagln3     |
| Eef2kmt    |
| Osgepl1    |
| Rpl36-ps12 |
| Mkx        |
| Nt5c3      |
| Atg9a      |
| Gls2       |
| Serbp1     |
| Thap4      |

|               |
|---------------|
| Kptn          |
| G530011O06Rik |
| Rpl7a-ps3     |
| Bcas2         |
| Tro           |
| Zfp707        |
| Zscan12       |
| Clpp          |
| Tmem147os     |
| Tpm4          |
| Pkd2l2        |
| Trib1         |
| Kcnj3         |
| Tmed1         |
| Ift122        |
| Dynlt3        |
| Gpat4         |
| Arf4os        |
| Cnm4          |
| Cdk5rap1      |
| Kctd20        |
| Fn3k          |
| Cdc42ep2      |
| Nab1          |
| Guk1          |
| Pex1          |
| Rpgr          |
| Gatd1         |
| Syap1         |
| Adrm1         |
| Comtd1        |
| Lrrc55        |
| Dynlt1b       |
| Taf2          |
| Snapin        |
| Znrd1         |
| Ypel4         |
| Pcca          |
| BC002163      |
| Gtf2ird1      |
| Ddx59         |
| Wdr11         |
| Uimc1         |
| Tmem229b-ps   |
| Myo10         |
| Isg20l2       |
| Serp2         |

|           |
|-----------|
| Ube2g2    |
| Susd2     |
| Clba1     |
| Ogdhl     |
| Prkcq     |
| Rab9      |
| Stmn4     |
| Cacnb1    |
| Atp6ap1l  |
| Uck2      |
| Tmed9     |
| Sncb      |
| Lyar      |
| Clptm1l   |
| Ddah1     |
| 9-Mar     |
| Slc35b4   |
| Tmsb4x    |
| Arhgap15  |
| Nudt9     |
| Pacsin1   |
| Rps12-ps1 |
| Coro6     |
| Ergic1    |
| Dpp7      |
| Hmga1b    |
| Dgkq      |
| Baalc     |
| Drd2      |
| Vopp1     |
| Ptp4a1    |
| Rps11     |
| Mir3091   |
| Ampd2     |
| Rpl12-ps1 |
| Mvb12a    |
| Eif2b5    |
| Igsf21    |
| AI413582  |
| Hibch     |
| Cox6b2    |
| Gprasp2   |
| Pml       |
| Cdip1     |
| Vbp1      |
| Htr2c     |
| Dcaf13    |

|               |
|---------------|
| Acid          |
| Rrp7a         |
| Lrp10         |
| Krt73         |
| Gpr89         |
| AV039307      |
| Spryd7        |
| Ifngr1        |
| Atg3          |
| Vldlr         |
| Rab4b         |
| Hcn1          |
| Zswim4        |
| Ptgfrn        |
| Mroh1         |
| Isg15         |
| Arhgap1       |
| Dctn4         |
| Herpud1       |
| Plgrkt        |
| B230217O12Rik |
| Snora24       |
| Rec8          |
| Pde1c         |
| Tceal6        |
| Zfp967        |
| Ebi3          |
| Ptcd2         |
| Sars2         |
| Rbx1          |
| Ahsa2         |
| Ppp3cb        |
| Brix1         |
| BC004004      |
| Tm9sf1        |
| Syng3         |
| Ccdc22        |
| Usp6nl        |
| Atp5j2        |
| Mospd1        |
| Mex3d         |
| Taf9          |
| Syt1          |
| B230398E01Rik |
| Cyb561d2      |
| Card19        |
| Bmt2          |

|               |
|---------------|
| Tsc1          |
| Vstm2l        |
| Kcnc2         |
| Zfp970        |
| Ppp1cc        |
| Impdh2-ps     |
| Dydc2         |
| Zc3hc1        |
| Crabp1        |
| Dvl3          |
| Ubfd1         |
| Snx25         |
| Gemin5        |
| Ddx51         |
| Fads6         |
| Washc1        |
| Aars2         |
| Nrbf2         |
| Akr1a1        |
| Nudt4         |
| Ccdc6         |
| Sp7           |
| Prkacb        |
| Ndufs3        |
| Zc3h12c       |
| Smarca4       |
| B230104I21Rik |
| Mcm4          |
| Trim66        |
| Ap2b1         |
| Dynlrb2       |
| Ncf1          |
| Usp46os1      |
| Eif4h         |
| Fbxo36        |
| Rfesd         |
| P4htm         |
| Snx19         |
| Asns          |
| Ppfia1        |
| Pced1b        |
| Eif4a2        |
| Oscp1         |
| Pde4dip       |
| Atp5o         |
| Mgl1          |
| Rpl31         |



|             |
|-------------|
| Pdcd6       |
| Armcx6      |
| Tm4sf5      |
| Zyx         |
| Slc35f1     |
| Rps18-ps1   |
| Nudt21      |
| Rinl        |
| Rgs10       |
| Exosc8      |
| Siva1       |
| Rubcn       |
| Casd1       |
| Klhdc4      |
| Ncoa7       |
| Pdp1        |
| Egfl7       |
| Rab14       |
| Bckdha      |
| Rgs8        |
| Sat2        |
| Selenok-ps4 |
| Sars        |
| Fbxl20      |
| Fam160b2    |
| Pdrg1       |
| Man1b1      |
| Rpl10a-ps2  |
| Kif3b       |
| Unc119      |
| Ino80c      |
| H13         |
| Faim        |
| Me2         |
| Bend6       |
| Ube2e2      |
| Gart        |
| Tbcc        |
| Itm2c       |
| Sdhaf1      |
| Mrpl20      |
| Hsd17b11    |
| Gmcs        |
| Morc3       |
| Ier3        |
| Garnl3      |
| Nop53       |

|           |
|-----------|
| Cyba      |
| Sstr1     |
| Lrrc45    |
| Slc9a8    |
| Mir6418   |
| Zfp641    |
| Vipas39   |
| Vrk1      |
| Phf8      |
| Zbtb4     |
| Serpine2  |
| Chrm3     |
| Tprgl     |
| Asb8      |
| Trak1     |
| Tnfrsf21  |
| Ptrhd1    |
| Mir6240   |
| Pus3      |
| Fam129b   |
| Exoc3l    |
| Mtfmt     |
| Itgb5     |
| Il6ra     |
| Hist1h2ai |
| Armc6     |
| Ccm2      |
| Asb1      |
| Rac2      |
| Adcy2     |
| St3gal4   |
| Nucb2     |
| Cpeb3     |
| Ap3s1-ps1 |
| Tmem35a   |
| Atcay     |
| Pabpn1    |
| Klhdc2    |
| Mtrf1     |
| Pip5kl1   |
| Fbxw9     |
| Tfr2      |
| Xrn2      |
| Dtx3      |
| Ptpa      |
| Spint1    |
| Rpa2      |

|         |
|---------|
| Tmem50b |
| Aldh9a1 |
| Nop58   |
| Zic3    |
| Zc3h10  |
| Gatad2a |
| Brms1   |
| Helz    |
| Chmp5   |
| Clstn3  |
| Pyurf   |
| Stxbp1  |
| Mir698  |
| Med29   |
| Zc2hc1a |
| Lsm4    |
| Sardhos |
| Wbp1    |
| Nsun5   |
| Tcp11l2 |
| Anapc7  |
| Tcof1   |
| Yjefn3  |
| Tcf3    |
| Ifitm10 |
| Supv3l1 |
| Spns1   |
| Cnot7   |
| Edc3    |
| Stox2   |
| Pycl    |
| Sf3b2   |
| Slc39a6 |
| Lhfp    |
| Gorasp1 |
| Siah2   |
| Repin1  |
| Abca9   |
| Frat2   |
| Zfp804a |
| Gla     |
| Cntn2   |
| Phtf2   |
| Zfp827  |
| Fam196b |
| Tpp2    |
| Pkp4    |

|           |
|-----------|
| Gstp1     |
| Relt      |
| Klhdc8a   |
| Tmeff2    |
| Pef1      |
| Wars      |
| Cyb5a     |
| Ube2q1    |
| Mmgt1     |
| Lrrc8a    |
| Ifnar2    |
| Ppme1     |
| Topors    |
| Shisa9    |
| Otud1     |
| Rpl32-ps  |
| Ppp1r8    |
| Gng5      |
| Cfap298   |
| Mrgpre    |
| Eps81     |
| Lrrtm3    |
| Cdk12     |
| Gnai2     |
| Slc30a6   |
| Wwox      |
| Tbc1d23   |
| Pid1      |
| Ankrd54   |
| Poli      |
| Htr1b     |
| Slc46a3   |
| Pisd-ps2  |
| Tpt1-ps6  |
| Rnf32     |
| Slu7      |
| Cacng5    |
| Zfp422-ps |
| Ucp2      |
| Ankrd42   |
| Trim7     |
| Rps18     |
| Smg7      |
| Dhcr24    |
| Slc52a2   |
| Anp32a    |
| Ywhaq     |

|            |
|------------|
| Gsx2       |
| Aagab      |
| Runx1t1    |
| Ube2ql1    |
| Mphosph6   |
| Stat3      |
| Mok        |
| Lhpp       |
| Rapgef3os2 |
| Atp5a1     |
| Coq9       |
| Tmem150a   |
| Pik3r2     |
| Nat9       |
| Laptm4a    |
| Eif3d      |
| Camk2n2    |
| Rsph3b     |
| Tob2       |
| Aqr        |
| N4bp1      |
| Bbs1       |
| Psmc1      |
| Maged2     |
| Pih1d1     |
| Fcor       |
| Pdss2      |
| Pde3a      |
| Fdx1l      |
| Ubox5      |
| Fgd3       |
| Cep85      |
| Mrpl51     |
| Zfp110     |
| Arih2      |
| Commd4     |
| Bcar1      |
| Dus4l      |
| Ap1b1      |
| Rnd1       |
| Cdh7       |
| Maea       |
| Hist1h4f   |
| Cul9       |
| Syt13      |
| Gtf3c5     |
| Spata2     |

|               |
|---------------|
| Tatdn1        |
| Usp20         |
| Dram2         |
| Ptchd1        |
| Nup50         |
| Snap91        |
| Rap1a         |
| D830030K20Rik |
| Astn1         |
| Rpl21-ps14    |
| Plppr1        |
| Cyp4x1        |
| Hat1          |
| Ret           |
| Daglb         |
| Lmnb2         |
| Nyap1         |
| Fam117a       |
| Ppp5c         |
| Zfp60         |
| Nsg1          |
| Atg13         |
| Mettl9        |
| Irf5          |
| Mc3r          |
| Tnfaip1       |
| Ctps          |
| Uqcr11        |
| Zfp248        |
| Cox11         |
| Slc38a1       |
| Dus2          |
| Cbr2          |
| Rbm3          |
| Hist1h4m      |
| Camsap1       |
| Tmem53        |
| Gad1          |
| Omg           |
| Hdac3         |
| Yaf2          |
| Pank4         |
| Tmem33        |
| Kat2a         |
| Maf           |
| Rtkn          |
| Bmp3          |

|             |
|-------------|
| Arf2        |
| Anapc10     |
| Plxdc2      |
| Clpb        |
| Vps53       |
| Txndc5      |
| Trmt112-ps2 |
| Ttc39c      |
| Mbd5        |
| Psmf1       |
| Cdk5        |
| Sync        |
| Tubb6       |
| Metrnl      |
| Strn4       |
| Mafg        |
| Dnph1       |
| Rpl10-ps2   |
| Ing4        |
| Vps41       |
| Zfyve19     |
| Trmt61a     |
| Chd6        |
| Jkamp       |
| Map1lc3b    |
| Mir7654     |
| Grid1       |
| Fgd5        |
| Metap1      |
| Ccl12       |
| Ankrd9      |
| Slc35a2     |
| Ints5       |
| Polr2i      |
| Pigv        |
| Adam17      |
| Rcc1l       |
| Pcbd1       |
| Ldhd        |
| Pigt        |
| Hnrnpk      |
| Il6st       |
| Slc25a29    |
| Kcnh5       |
| Txndc11     |
| Cystm1      |
| Eftud2      |

|               |
|---------------|
| Sv2c          |
| Zfp579        |
| Pdia3         |
| Tspan17       |
| Adamts17      |
| Rrp1b         |
| Vmp1          |
| Syn1          |
| Slc35b1       |
| Mir671        |
| Miga1         |
| Ppp4c         |
| Polr2h        |
| Cadm4         |
| Rpl31-ps7     |
| Drc1          |
| Itpkb         |
| Letm2         |
| Krt222        |
| Fam110b       |
| Sord          |
| Hist1h4d      |
| Rgs17         |
| Pdcl          |
| Ube2e3        |
| Rhobtb2       |
| Rab3gap1      |
| Zdhhc5        |
| Calu          |
| Lmf2          |
| Psm2          |
| Drosha        |
| Stx4a         |
| C530050E15Rik |
| Poldip3       |
| Cmtm7         |
| Hspe1-ps2     |
| Iqsec1        |
| Ric3          |
| Hectd4        |
| Hmgb3         |
| Tmtc2         |
| Abhd11os      |
| Klc4          |
| Eif2a         |
| Usp46         |
| Hist1h2aj     |



|               |
|---------------|
| Gpx7          |
| Ndufab1-ps    |
| Pi4ka         |
| Mppe1         |
| Zbtb45        |
| Trmt1         |
| Pink1         |
| Med9          |
| Snx7          |
| Yipf5         |
| Ccdc138       |
| Sp8           |
| Mta1          |
| Klf12         |
| Lmo2          |
| Kansl1        |
| Tmem127       |
| Rgs12         |
| B930094E09Rik |
| Coil          |
| Zfp322a       |
| Aaas          |
| Carns1        |
| Top3b         |
| Pebp1         |
| Uba5          |
| Qpct          |
| Yif1a         |
| Tbc1d17       |
| Arl6ip1       |
| Bet1l         |
| Rpl35a-ps7    |
| Mtfr1         |
| Saysd1        |
| Apeh          |
| Racgap1       |
| Mrpl4         |
| Tubgcp5       |
| Dpm1          |
| Ndel1         |
| Snu13         |
| Scamp1        |
| Mdga2         |
| Prpf6         |
| Foxj2         |
| Rbm19         |
| Asl           |

|           |
|-----------|
| Smn1      |
| Rundc3a   |
| Naa20     |
| Aldh18a1  |
| Slc3a2    |
| Ypel5     |
| Ergic3    |
| Hrh2      |
| Ppm1a     |
| Rad51     |
| Abca3     |
| Ntsr1     |
| Cisd2     |
| Ube4a     |
| Chpf2     |
| Wrap73    |
| Cmc2      |
| Fyb       |
| Samd15    |
| Mlycd     |
| Fkbp2     |
| Yipf1     |
| Kat14     |
| Zfp939    |
| Bfar      |
| Hey1      |
| Polr1e    |
| Nup133    |
| H2afz     |
| Zer1      |
| Pcp4      |
| Mrpl37    |
| Camk1     |
| Zfand4    |
| Commd8    |
| Pak6      |
| Ccl22     |
| Idh2      |
| Dhx32     |
| Wdr17     |
| Hist2h2ac |
| Katnal1   |
| Cyp2u1    |
| Fgf9      |
| H2-T22    |
| Kcnn1     |
| Gtf2h1    |

|          |
|----------|
| Klf5     |
| Rpn1     |
| Kcnd1    |
| Rnf113a1 |
| Msh3     |
| Dner     |
| Dpp10    |
| Abhd11   |
| Dusp22   |
| Fam184b  |
| Mrps17   |
| Pcdhb22  |
| Ctss     |
| Tmem101  |
| Ccl19    |
| Dhodh    |
| Pou6f1   |
| Necab3   |
| Mpv17l2  |
| Itgb1bp1 |
| Sorcs1   |
| Mrps6    |
| Ctsz     |
| Socs5    |
| Mrpl44   |
| Ehbp1l1  |
| Slc7a5   |
| Flrt2    |
| Slc25a19 |
| Tceal7   |
| Cox6a1   |
| Aprt     |
| Sem1     |
| Cyc1     |
| Atp8a2   |
| Cx3cl1   |
| Chrna4   |
| Zfp94    |
| Pou2f2   |
| Trmt12   |
| Vamp8    |
| Capsl    |
| Ppt2     |
| Snta1    |
| Psen1    |
| Cep89    |
| Ikzf1    |

|            |
|------------|
| Sgcb       |
| Znhit1     |
| Tmub1      |
| Gemin4     |
| Mrpl23-ps1 |
| Tmem119    |
| Poc1a      |
| Gosr2      |
| Acad9      |
| Rrp1       |
| Sirt3      |
| Sft2d1     |
| Crmp1      |
| Poc5       |
| Ackr3      |
| Anapc15    |
| Tmem110    |
| Ptpro      |
| Mtap       |
| Fam84a     |
| Nme5       |
| Cuedc1     |
| Aarsd1     |
| Map3k9     |
| Ttbk2      |
| Igfbp3     |
| Edil3      |
| Hexdc      |
| Dnajc15    |
| Kcnmb2     |
| Sgta       |
| Rps6ka4    |
| Cks2       |
| Ugg1       |
| Cir1       |
| Idnk       |
| Atp6v1g2   |
| Smad9      |
| Rab5if     |
| Btg1       |
| Cyth4      |
| Mest       |
| Bpgm       |
| Snx12      |
| Zfp335     |
| Gstm7      |
| Abhd6      |

|          |
|----------|
| Csnk1g3  |
| Nipa2    |
| Atp5g2   |
| Smap1    |
| Tm2d3    |
| Pik3ca   |
| Map6     |
| Phf2     |
| Cc2d1a   |
| Pold3    |
| Dhrs7    |
| Cetn2    |
| Vac14    |
| Rars2    |
| Lsm7     |
| Vamp1    |
| Znrd1as  |
| Cntnap5c |
| Coro7    |
| Tac2     |
| Akr1b10  |
| Hs3st5   |
| Eral1    |
| Zbtb12   |
| Rapgef3  |
| BC003965 |
| Med19    |
| Fam102b  |
| Tcte2    |
| Rtn3     |
| Rab3ip   |
| Pcdhb19  |
| U2af2    |
| Pgam5    |
| Os9      |
| Dzip1    |
| Fndc9    |
| Gramd1a  |
| Tmem132e |
| Parva    |
| Dgkk     |
| Fdft1    |
| Tenm2    |
| Fbxo8    |
| Mpg      |
| Irf2bp1  |
| Drap1    |

|               |
|---------------|
| Timm8b        |
| Sema6b        |
| Mri1          |
| Adipor1       |
| Spcs2-ps      |
| Gpatch2       |
| Ankrd34b      |
| Cdh10         |
| Ago1          |
| Bola3         |
| Mrpl28        |
| Acsf3         |
| Pak1          |
| Yy1           |
| Hdgfl3        |
| B130034C11Rik |
| Zc3h4         |
| Ubqln2        |
| Rpl37a        |
| Snrpg         |
| Tmem145       |
| Tsg101        |
| Mrps14        |
| Fyn           |
| Rpl34         |
| Kirrel3       |
| Senp5         |
| Trim28        |
| Cops5         |
| Rpl27-ps1     |
| Cadps         |
| Hfe           |
| Sox13         |
| Syt15         |
| Gas6          |
| Apoo          |
| Dcaf8         |
| Drg1          |
| Ncstn         |
| Smt3h2-ps     |
| BC029722      |
| Golga2        |
| 6-Sep         |
| Fabp5         |
| Zfp354c       |
| Deaf1         |
| Adck5         |

|            |
|------------|
| Slc35g2    |
| Lfn5       |
| Pmpca      |
| Asah1      |
| Eml3       |
| Inpp5b     |
| Gnb5       |
| Snx4       |
| Smndc1     |
| Pcyt2      |
| Arx        |
| Slc2a13    |
| Ctu1       |
| Rbfox3     |
| Nck1       |
| Plk3       |
| B4galt5    |
| Bap1       |
| Mcm6       |
| Ccdc78     |
| Tmem219    |
| Cutc       |
| Wbp1l      |
| Arpc3      |
| Plekho1    |
| Cntn4      |
| Kctd12     |
| Rpl14-ps1  |
| Ino80dos   |
| Wdr73      |
| Surf1      |
| Slc37a1    |
| Foxred1    |
| Syng2      |
| Exosc4     |
| Rtcbl      |
| Cradd      |
| Dnajb1     |
| Ddb2       |
| Hist2h2aa2 |
| Tuba1a     |
| Psmc3      |
| Med27      |
| Prcp       |
| Pdk3       |
| Cct3       |
| Fbrs       |

|            |
|------------|
| Pdzd8      |
| Sqstm1     |
| Pcx        |
| Slc9a5     |
| C1qb       |
| Chchd5     |
| Tcea1      |
| Slc25a39   |
| Isoc1      |
| Jak1       |
| Brpf3      |
| Kcnh2      |
| Tbc1d22bos |
| Bcap29     |
| Tbc1d8     |
| Tex9       |
| Rmnd1      |
| Paip2      |
| Rab18      |
| Nip7       |
| Dgcr2      |
| Txnrd1     |
| Cd63-ps    |
| Hnrnpa3    |
| Zbtb2      |
| Arfip2     |
| Spata32    |
| Colgalt1   |
| Havcr2     |
| Srxn1      |
| Rpl15-ps3  |
| Sf3a1      |
| Klhl18     |
| Tspyl4     |
| Gnal       |
| Nenf       |
| Zfp825     |
| Sf1        |
| Rps12-ps16 |
| Vcpip1     |
| Pdcd4      |
| Emc1       |
| Zmiz1      |
| Trim8      |
| Ptpn5      |
| Usp33      |
| Htr7       |



|               |
|---------------|
| Hdlbp         |
| Oxnad1        |
| Snx14         |
| Slc25a32      |
| Trpc7         |
| Rbms3         |
| Cidea         |
| Adam22        |
| Prkx          |
| BC001981      |
| Tiprl         |
| Cxcr4         |
| Mir1903       |
| Pno1          |
| Fli1          |
| Cited4        |
| Top2b         |
| Lbh           |
| Alg5          |
| Gpkow         |
| Pcdh7         |
| Nrp2          |
| Prps1         |
| Ccnt1         |
| Fam168a       |
| Tmem50a       |
| Diras1        |
| Akna          |
| Sac3d1        |
| Morf4l2       |
| Acot9         |
| Glp1r         |
| Azi2          |
| Pdap1         |
| Odf3b         |
| Ap3s1-ps2     |
| Cox7a2l       |
| Thap3         |
| C530005A16Rik |
| Gpr158        |
| Snord42b      |
| Pcgf1         |
| Zfp637        |
| Nanos1        |
| Slc35f6       |
| Tmem199       |
| Rnf121        |

|           |
|-----------|
| Fam120a   |
| Asnsd1    |
| Coq8b     |
| Sav1      |
| Abhd17a   |
| Yars2     |
| Tmem176b  |
| Ndufc2    |
| Kpna2     |
| Impad1    |
| Kdm6bos   |
| Zfp358    |
| Dcps      |
| Ttl12     |
| Ormdl2    |
| Anapc2    |
| Nefh      |
| Mfsd10    |
| Cul7      |
| Cdc37     |
| Cebpzoz   |
| Fastk     |
| Myo9a     |
| Fbrsl1    |
| Fbxl19    |
| Svop      |
| Ptgs1     |
| Phykpl    |
| Prdm4     |
| Zic2      |
| Ubn1      |
| Tmem28    |
| Mob3a     |
| Exosc2    |
| Mid1      |
| Ech1      |
| Wdr20     |
| Cplx2     |
| Ccdc85b   |
| Atf2      |
| Rps16-ps2 |
| Elp6      |
| Gfra2     |
| Cyld      |
| Hist1h3e  |
| Eif4ebp2  |
| Taco1     |

|           |
|-----------|
| Cox5a     |
| Mif-ps3   |
| Vars      |
| Rnmt      |
| Sec24c    |
| Pemt      |
| Armc8     |
| Hmgb1-ps9 |
| Rab42     |
| Mkxn1     |
| Gtpbp6    |
| Exosc9    |
| Syf2      |
| Zfp385a   |
| Cib2      |
| Pcp2      |
| Nrn1l     |
| Sucla2    |
| Gfm2      |
| Cyp46a1   |
| Dnhd1     |
| Arfgap3   |
| Cfdp1     |
| Stac      |
| Hmces     |
| Rpl36-ps3 |
| Mto1      |
| St3gal6   |
| Ifit3b    |
| Zfp7      |
| Rhoq      |
| Commd3    |
| Snrpd3    |
| Prcd      |
| Rpf2      |
| Arfrp1    |
| Ccr5      |
| Eif4g1    |
| Dtx1      |
| Prss23    |
| Dhx8      |
| Zkscan16  |
| Rwdd4a    |
| Ass1      |
| Tacr1     |
| Fez1      |
| Fbxw4     |

|           |
|-----------|
| Nudt14    |
| Zfp280b   |
| Afg3l2    |
| Cpsf1     |
| Fntb      |
| Zfp647    |
| Vps8      |
| Ppp1r26   |
| Gapdhs    |
| Sec23b    |
| Sema6d    |
| Avpi1     |
| Gnas      |
| Jakmip3   |
| Rexo4     |
| Jup       |
| Rpl41     |
| Smarcc1   |
| Erlin2    |
| Lysmd2    |
| Nkx6-2    |
| Armcx1    |
| Fkbp1     |
| Tmem256   |
| Nagpa     |
| Smim15    |
| R74862    |
| Eno3      |
| Htr3a     |
| Dlx1      |
| Smyd5     |
| Eef1a2    |
| Mrpl17    |
| Fbf1      |
| Hist1h2al |
| Uba3      |
| Mfsd6     |
| Slc6a6    |
| Ndufaf3   |
| Ildr2     |
| Cd300c2   |
| Washc3    |
| Tmem189   |
| H2-DMA    |
| Rgs6      |
| Bnip1     |
| Atad3a    |

|               |
|---------------|
| Smarca5       |
| Parp16        |
| Chordc1       |
| Msto1         |
| Pla2g6        |
| Pthlh         |
| Hist1h2ac     |
| Ssbp4         |
| Rnf40         |
| Hpcal1        |
| Pou3f4        |
| Csf1r         |
| Srf           |
| Cog4          |
| Hnrnph2       |
| Ero1l         |
| Kat8          |
| Ank1          |
| Hddc3         |
| Ccdc59        |
| Ube3b         |
| Slc5a6        |
| Rnf11         |
| Zfp51         |
| Pip4p2        |
| Ninj1         |
| B3gat2        |
| Golt1b        |
| Tmed3         |
| Slc2a3        |
| Akt1s1        |
| Osbpl3        |
| Tmem41b       |
| Bcl2a1b       |
| Rae1          |
| Cops8         |
| Lrif1         |
| Rnf217        |
| Aspscr1       |
| Fgf18         |
| Tshz1         |
| Magel2        |
| E130102H24Rik |
| Mocs1         |
| Rpl23         |
| Cd55          |
| Wnt7a         |

|            |
|------------|
| Ift46      |
| Dennd4a    |
| Mfap1b     |
| Gmppa      |
| Mknk1      |
| Atg4c      |
| Caml       |
| Rab11b-ps2 |
| Nxpe3      |
| Cep131     |
| Dym        |
| Scp2-ps2   |
| Chst2      |
| Zfp748     |
| Pwp1       |
| Abr        |
| Gpr153     |
| Slc6a17    |
| Dnajc8     |
| Rasl11a    |
| Thtpa      |
| ErbB4      |
| Fbxo46     |
| Pitrm1     |
| Smg9       |
| Arxes2     |
| Rpap1      |
| Brd4       |
| Gpr61      |
| Tnip1      |
| Slc27a2    |
| Gabrg2     |
| Sntg1      |
| Vax1       |
| Slc2a8     |
| Dpysl4     |
| Nolc1      |
| Tmem14c    |
| Zfp109     |
| Rrs1       |
| Polr3h     |
| Wdr38      |
| Stoml1     |
| Paip2b     |
| Thsd7a     |
| Ctnnd2     |
| Gmps       |

|            |
|------------|
| Cmss1      |
| Sorcs3     |
| Cdc34      |
| Kifc3      |
| Nol8       |
| Cacng7     |
| Mn1        |
| Ddx1       |
| Rrm2b      |
| Pcp4l1     |
| Ddit3      |
| Fgf12      |
| Fibp       |
| Utp18      |
| Stmn2      |
| Tarsl2     |
| Msi2       |
| Rpl21-ps6  |
| Lrrcc1     |
| Nfkbib     |
| Bloc1s5    |
| Tifab      |
| Glod4      |
| Ltv1       |
| Cd2bp2     |
| Nfam1      |
| Naa10      |
| Apoo-ps    |
| AW121686   |
| Fbxw8      |
| Uqcrq      |
| Zfp420     |
| Higd2a     |
| Dync1li1   |
| Phf12      |
| Nap1l1     |
| Sgsm2      |
| Khdrbs1    |
| Gpr84      |
| Tm9sf3     |
| Scand1     |
| Gadd45gip1 |
| Ikbip      |
| Kcnab3     |
| Dohh       |
| Grpel1     |
| Las1l      |

|            |
|------------|
| Tpst2      |
| Tmod3      |
| Gdi2       |
| Trappc10   |
| Fbxl12     |
| Lyn        |
| Noc2l      |
| Sdf2       |
| Senp2      |
| Adck2      |
| Lym9       |
| Gfpt1      |
| Ndufs1     |
| Cast       |
| Med8       |
| Galnt14    |
| Rps19-ps6  |
| Lrrc49     |
| MacroD1    |
| Calm3      |
| Nlgn2      |
| Coq3       |
| Rnd3       |
| Mettl18    |
| Slc15a4    |
| Agk        |
| Exoc8      |
| Ssna1      |
| Zmynd19    |
| Gad1-ps    |
| Git1       |
| Fbxl6      |
| Pigyl      |
| Adprhl2    |
| Opa1       |
| Dbn1       |
| Vps33b     |
| Tunar      |
| Gpr137b-ps |
| Bud13      |
| Krr1       |
| Ypel3      |
| Hsp90aa1   |
| Il13ra1    |
| Pigk       |
| Sh3gl1     |
| S100a4     |



|            |
|------------|
| Rnf4       |
| Ogg1       |
| Bloc1s1    |
| Olfm2      |
| Rpl31-ps9  |
| Zfp454     |
| Btf3       |
| Fam20b     |
| Zfp966     |
| Them4      |
| Polr3gl    |
| Mllt3      |
| Pmvk       |
| Smt3h2-ps4 |
| Plch1      |
| Tmem30a    |
| Brsk1      |
| Pabpc4     |
| Ptrh2      |
| Casc3      |
| Pnpla6     |
| Rims2      |
| Lin9       |
| Elovl6     |
| Mad2l1     |
| Zfp781     |
| Fkbp1a     |
| Hmgb1-ps1  |
| Eif3k      |
| Phpt1      |
| Thop1      |
| Galnt2     |
| Pdzk1      |
| Fam124a    |
| Kalrn      |
| Zfp219     |
| Vkorc1l1   |
| Acta1      |
| Magohb     |
| Icam4      |
| Ajap1      |
| Fam221b    |
| Arid1a     |
| Rora       |
| Aar2       |
| Tsr3       |
| Aamp       |

|            |
|------------|
| Zfp160     |
| Faap24     |
| Ilk        |
| Lym7       |
| Med10      |
| Sugt1      |
| Rbp4       |
| Wdr81      |
| Fam19a5    |
| Slc2a6     |
| Zdhhc3     |
| Kcnd3      |
| Zfp330     |
| Spire2     |
| Uhrf1bp1   |
| Dlat       |
| Rps12-ps21 |
| Eps813     |
| Eya1       |
| Ldb1       |
| Cd200      |
| Ccdc126    |
| Gba2       |
| Jade2      |
| Tmem206    |
| Rab27a     |
| Mir7666    |
| Cd24a      |
| Cep19      |
| Mtx1       |
| Arpin      |
| Gpatch2l   |
| Cyb5r1     |
| Rfc2       |
| Eif1-ps1   |
| Snrpe      |
| Iqcb1      |
| Rpl31-ps16 |
| Zfp593     |
| Kansl3     |
| Zswim8     |
| Cdkn1a     |
| Rabl6      |
| Sh3bp5l    |
| Mir425     |
| Esf1       |
| Gabbr2     |

|           |
|-----------|
| Gnpnat1   |
| Smarce1   |
| Srp72     |
| Ddx24     |
| G0s2      |
| Tmem88    |
| Nme1      |
| Chrac1    |
| Tmem129   |
| Stradb    |
| Ict1os    |
| Slc25a11  |
| Fam131c   |
| Srsf6     |
| Uqcc1     |
| Wdr54     |
| Ppp1r10   |
| Mtfr1l    |
| Tmem65    |
| Mrps2     |
| Tor1aip2  |
| Tmem185a  |
| Tmem151b  |
| Rnf138rt1 |
| Aaed1     |
| Homez     |
| Tcaf1     |
| Rnf145    |
| Derl1     |
| Lrrc71    |
| Ubl3      |
| Tepsin    |
| Degs1     |
| Anks1     |
| Zfand2b   |
| Mrpl35    |
| Casp9     |
| Klhl8     |
| Mrpl11    |
| Ngrn      |
| Zfp846    |
| Slc9a3r2  |
| Rps4l-ps  |
| Fus       |
| Pcdha11   |
| Nupl2     |
| Cnih1     |

|            |
|------------|
| Blvra      |
| Erp29      |
| Rpl35a-ps4 |
| Ecscr      |
| Ube2k      |
| Rpl14      |
| Pcnx3      |
| Hsdl1      |
| Clcn5      |
| Rnpep      |
| Fam192a    |
| Mbd3       |
| Zim1       |
| Epn1       |
| Greb1l     |
| Trappc6a   |
| Saxo2      |
| Rgs19      |
| Rap1gap    |
| Nynrin     |
| Sdhd       |
| Zfp930     |
| Tnnt1      |
| Vma21-ps   |
| Cxxc4      |
| Fads3      |
| Slco3a1    |
| Eif3m      |
| Tor1a      |
| Cnr1       |
| Hist1h2be  |
| Hist3h2a   |
| Lamtor1    |
| Slc39a1    |
| Lrtm2      |
| Pde1b      |
| Zxdb       |
| Tbcb       |
| Ing3       |
| Vegfb      |
| Dnajc5     |
| Ksr2       |
| Jpt1       |
| Hexim1     |
| Hist1h4k   |
| Tceal5     |
| Hmbs       |

|           |
|-----------|
| Bcl2      |
| Dlk2      |
| Rab6a     |
| Mrps28    |
| Tbc1d10b  |
| Rasl10b   |
| Lrrc24    |
| Tmem117   |
| Ttc8      |
| Oaz1      |
| Cdc34b    |
| Adnp2     |
| Cars2     |
| Smpd1     |
| Robo1     |
| Csf3r     |
| Pik3r4    |
| Fmc1      |
| Fam3a     |
| Rpl30-ps3 |
| Rrp36     |
| Rpl7l1    |
| Irak1     |
| Champ1    |
| Fbxo6     |
| Cldn3     |
| Dis3l     |
| Plxdc1    |
| Moxd1     |
| Pck2      |
| Tgoln1    |
| Ube2b     |
| Trpc4     |
| Chsy3     |
| Zfp692    |
| Upp2      |
| Rbbp4     |
| Synpr     |
| Rundc3b   |
| Rhot1     |
| AU040320  |
| Polr2f    |
| Nicn1     |
| Gfra1     |
| Atg16l1   |
| Prpf19    |
| Ints3     |

|            |
|------------|
| Twf2       |
| Loxl3      |
| Diaph1     |
| Tnks       |
| Lrp11      |
| Entpd4b    |
| Gchfr      |
| Maoa       |
| Mir6984    |
| Haus4      |
| Map1lc3a   |
| Cenpw      |
| Shisa5     |
| Vps51      |
| Wdr59      |
| Tox        |
| Erlec1     |
| Rab10os    |
| Sv2a       |
| Paqr3      |
| Svbp       |
| Rnps1      |
| Psm7       |
| Pcyt1b     |
| Sik2       |
| Actb       |
| Supt5      |
| Rps15a-ps4 |
| Eno1       |
| Ascc1      |
| Egr4       |
| Cox7a1     |
| Rarres2    |
| Flcn       |
| Plcxd1     |
| Fam114a1   |
| Zfp865     |
| Fam210b    |
| Gskip      |
| Narfl      |
| Pip5k1b    |
| Rsu1       |
| Gcsh       |
| Slc4a8     |
| Mpi        |
| Coa6       |
| Rpl27-ps3  |

|               |
|---------------|
| Dnajc17       |
| Sass6         |
| Adam10        |
| Tpm3-rs7      |
| Slc35a5       |
| Wdr1          |
| Sla2          |
| Hmgb1-ps2     |
| Map3k11       |
| Zdhhc13       |
| Commd1        |
| Spg7          |
| E230016M11Rik |
| Ndufa13       |
| Dgcr6         |
| Gpr176        |
| Pomt2         |
| Bag4          |
| Bdh1          |
| Noc4l         |
| Gpr101        |
| Wdr45b        |
| Rbl2          |
| Amacr         |
| Pja1          |
| Fam174b       |
| Ifit3         |
| Akirin2       |
| Senp7         |
| Cbx1          |
| Ddr1          |
| Rcbtb2        |
| Ap1g1         |
| Dph1          |
| Memo1         |
| Arid4a        |
| Scnm1         |
| Sh3bp2        |
| Mafk          |
| Enho          |
| Fkbp1b        |
| Snx1          |
| BC035947      |
| Ap1m1         |
| Kcnj12        |
| Cd151         |
| Lptm5         |

|           |
|-----------|
| Lmbr1     |
| n-R5s151  |
| Rapgef2   |
| Snrnp200  |
| Rps15a    |
| Mpst      |
| Klc1      |
| Myl1      |
| Npas1     |
| Zdhhc18   |
| Usp19     |
| Spcs2     |
| Dus3l     |
| Qpctl     |
| Hes7      |
| Suox      |
| Mrps10    |
| Tmem147   |
| Eif2b1    |
| Gmcl1     |
| Slc35c1   |
| Pygo1     |
| Pfn1      |
| Ube3a     |
| Rab11fip4 |
| App       |
| Zfp937    |
| Ndufa11   |
| Mapk9     |
| Atp6v1a   |
| Cep250    |
| Rtf2      |
| Minpp1    |
| Rfng      |
| Ccdc124   |
| Cct5      |
| Exoc3     |
| Nprl3     |
| Osbpl5    |
| Bin2      |
| Fah       |
| Tmco6     |
| Hip1r     |
| Cntn6     |
| Gpr137c   |
| Zfp35     |
| Zfp983    |



|          |
|----------|
| Ccdc34   |
| Inpp5d   |
| E2f1     |
| Ranbp10  |
| Commd6   |
| Selenon  |
| Snrpb2   |
| Pdzrn3   |
| Fundc2   |
| Trmt2b   |
| Nup85    |
| Tmem131  |
| Ttc27    |
| Fkbp4    |
| Tmem132c |
| Slc46a1  |
| Sf3b6    |
| Dynlt1f  |
| Aptx     |
| Zfp53    |
| Rb1cc1   |
| Cog6     |
| Tsnax    |
| Kdm5c    |
| Sms-ps   |
| Mllt1    |
| Mrps18a  |
| Rabac1   |
| Gng7     |
| Cfh      |
| Mras     |
| Cdkl5    |
| Fuz      |
| Tmem107  |
| Rerg     |
| Cox8a    |
| Dmrt2    |
| Snf8     |
| Mrps18c  |
| Wdr13    |
| Rpl35a   |
| Cmklr1   |
| Mrpl47   |
| Slc7a7   |
| Swi5     |
| Kri1     |
| Rasip1   |

|               |
|---------------|
| Zfp626        |
| Abcf2         |
| Tcerg1l       |
| Sirt5         |
| M6pr          |
| Tsc2          |
| Ugp2          |
| Ranbp3        |
| Adarb2        |
| Wwp1          |
| Optn          |
| Ccdc167       |
| Irs2          |
| Mb21d2        |
| Zfp119a       |
| Hspa8         |
| Ano10         |
| Clstn1        |
| Ccdc160       |
| Tmem11        |
| Agpat1        |
| Dynlt1-ps1    |
| Tubgcp3       |
| Pcyox1l       |
| Eif2ak3       |
| Kifap3        |
| Rbm8a         |
| Mnat1         |
| Fem1a         |
| Ankrd11       |
| Smarcal1      |
| Psmg4         |
| Ctsc          |
| Gapdh-ps15    |
| C330007P06Rik |
| Elovl4        |
| Zrsr2         |
| Ngly1         |
| Epb41l2       |
| Mtif3         |
| Epc2          |
| Golga7b       |
| Thada         |
| Pank2         |
| Atp6v0b       |
| Dbi           |
| Hs6st2        |

|        |
|--------|
| Igsf5  |
| Nap1l4 |
| Kcna6  |

D230017M19Rik

|           |
|-----------|
| Itpa      |
| Lrrfip1   |
| Nme3      |
| Ano8      |
| Ciapi1    |
| Shtn1     |
| Ddx18     |
| Zfp410    |
| Cd99l2    |
| H2-Ke6    |
| Ldhd      |
| Psmal6    |
| Ppp1r3e   |
| D6Wsu163e |
| Pnoc      |
| Tfam      |
| Psen2     |
| Eef1akmt2 |
| Susd4     |
| Cxadr     |
| Gemin2    |
| Slc29a2   |
| Acp1      |
| Tm2d1     |
| Rps15     |
| Gpr173    |
| Spryd3    |
| Mesd      |
| Lsm5      |
| Fau       |
| Pcdhb14   |
| Zfp709    |
| Ccdc166   |
| Nars      |
| Twistnb   |
| Vamp4     |
| Pgap1     |
| Pcdhb20   |
| Cdk5r1    |
| Bcl2l2    |

B230217C12Rik

|        |
|--------|
| Ppp6r2 |
| Snx10  |

|           |
|-----------|
| Eif4enif1 |
| lars      |
| Pkig      |
| Ltbp3     |
| Vps9d1    |
| Slc25a17  |
| Pomgnt1   |
| Tmem209   |
| Mcts2     |
| Plrg1     |
| Dbt       |
| Mterf2    |
| Armc10    |
| Fxyd2     |
| Frmpd3    |
| Cog1      |
| Mrps36    |
| Fstl1     |
| Parp9     |
| Arhgap44  |
| Hnmt      |
| Pcbp3     |
| Hrasls    |
| Mir7676-2 |
| Ccl25     |
| Fcgr3     |
| Zfp27     |
| Mrpl2     |
| Hnrnpl    |
| Upf1      |
| Ppcdc     |
| Ssbp1     |
| Naxd      |
| Klhl22    |
| Akap2     |
| Gng2      |
| Rtl6      |
| Scmh1     |
| Fdx1      |
| Man2c1    |
| Tefm      |
| Akr1b3    |
| Nop16     |
| Cox7b2    |
| Sympk     |
| Trp53i13  |
| Snrpd1    |

|               |
|---------------|
| Ap3s2         |
| Flywch2       |
| D030056L22Rik |
| Vwa1          |
| Arl4c         |
| Capza1        |
| Snx32         |
| Atp5e         |
| Trbc1         |
| Nectin1       |
| Mier2         |
| Wscd1         |
| Rragd         |
| Mob3c         |
| Dpm2          |
| Asb4          |
| Rnf14         |
| Atp1b2        |
| Hmgcl         |
| Slc18b1       |
| Anxa6         |
| Zkscan14      |
| Scrn1         |
| Psme2         |
| Spred2        |
| Bcar3         |
| Galk2         |
| Tmbim4        |
| Dhdh          |
| Tbpl1         |
| Nudt16        |
| Adcy8         |
| Pdcd2         |
| Fam229b       |
| Cdk11b        |
| Dusp15        |
| Cbx3-ps1      |
| Sparcl1       |
| Arl10         |
| Trmt61b       |
| Scn3a         |
| Znhit6        |
| Rab5b         |
| Ica1l         |
| Nanp          |
| Noc3l         |
| Lrrtm4        |

|           |
|-----------|
| Ndufaf1   |
| Mir692-2  |
| Itfg1     |
| Med22     |
| Plekha1   |
| Uchl1os   |
| Cdk2ap1   |
| Kctd8     |
| Lss       |
| Acyp2     |
| Sin3b     |
| Rpl7a-ps8 |
| Entpd4    |
| Btbd2     |
| Ankdd1b   |
| Ftsj3     |
| Xpa       |
| Amd-ps4   |
| Prpsap1   |
| Myo5b     |
| Ccdc127   |
| Zfp382    |
| Rpl30-ps9 |
| Srpk1     |
| Ppip5k2   |
| Timm17a   |
| Cript     |
| Rassf5    |
| Nudt1     |
| Ehbp1     |
| Inpp5k    |
| Mapkapk5  |
| Ebf4      |
| Zfp638    |
| Gopc      |
| Rspry1    |
| Pnck      |
| Gria4     |
| Vwa5a     |
| Efemp2    |
| Bysl      |
| D1Ert622e |
| B3gnt1    |
| Scoc      |
| Smim17    |
| Rasd2     |
| Dstn      |

|           |
|-----------|
| Ttc13     |
| Gon4l     |
| Zfp422    |
| Dnajb3    |
| Rnf25     |
| Sdr39u1   |
| Lypd6b    |
| Rps25-ps1 |
| Ppp1r21   |
| Ssr4      |
| Dact2     |
| Xrcc5     |
| Mir7010   |
| RF01953   |
| Oasl2     |
| 4-Mar     |
| Fbxo25    |
| Mtss1l    |
| Tlk1      |
| Fbxo10    |
| Dip2a     |
| Aard      |
| Gng13     |
| Emc3      |
| Armcx3    |
| Rbks      |
| Grhpr     |
| Extl2     |
| Tars      |
| Mir344g   |
| Gclc      |
| Dmtn      |
| Bag2      |
| Auh       |
| Lgals9    |
| Trio      |
| Cntnap4   |
| Mir343    |
| Anp32e    |
| Cd320     |
| Pnpla8    |
| Ap3d1     |
| Brpf1     |
| Mir21a    |
| Slc43a2   |
| C1ql1     |
| Lypla2    |

|               |
|---------------|
| Rdh11         |
| Krtcap2       |
| 2-Mar         |
| Mrpl39        |
| Borcs8        |
| E430024P14Rik |
| Nomo1         |
| Rps11-ps3     |
| Ndufs8        |
| Tbc1d20       |
| Gtf2i         |
| Nhs           |
| Snx16         |
| Dnajib11      |
| Lin7b         |
| Orc5          |
| Prdx5         |
| Smarcb1       |
| Ankrd50       |
| Asxl1         |
| Rnaseh2a      |
| Faap100       |
| Rpl19-ps12    |
| Hpgd          |
| Atp5k         |
| Itm2b         |
| Xylb          |
| Gad2          |
| Pgd           |
| Itga3         |
| Gcc1          |
| Jmjd6         |
| Nat8b-ps      |
| Dennd2a       |
| Ndufa8        |
| Nbl1          |
| Dync1i1       |
| Ier5l         |
| Flad1         |
| Puf60         |
| Rxra          |
| Zdhhc22       |
| Wdr46         |
| Ercc3         |
| Fbxl4         |
| Zfp125        |
| Sf3a3         |



|           |
|-----------|
| Dgkd      |
| Emc7      |
| Tmem138   |
| Eif3j2    |
| Faf1      |
| Zfp804b   |
| Fermt3    |
| Hnrnpab   |
| Tmem17    |
| Abi3      |
| Dalrd3    |
| Eme1      |
| Inpp5f    |
| Nae1      |
| Wdr25     |
| G3bp2     |
| Msrb1     |
| Bcl9      |
| AU02252   |
| Castor2   |
| Zfhx2os   |
| Dusp5     |
| Mir3104   |
| Pgk1      |
| Ddb1      |
| Efcab1    |
| Oxr1      |
| Nfkbil1   |
| Hspbp1    |
| Gpx1      |
| Mblac2    |
| Ablim3    |
| Stx5a     |
| Msantd4   |
| Hist1h2bb |
| Pnma2     |
| Slc36a1   |
| Mtmr4     |
| Etfb      |
| Clu       |
| Pgr       |
| Mettl17   |
| Lhfp14    |
| Tmem141   |
| Ncoa5     |
| Ttll7     |
| Fastkd1   |

|               |
|---------------|
| Fuca1         |
| C230037L18Rik |
| Gramd4        |
| Ugdh          |
| Tada2b        |
| Atg101        |
| Hhat1         |
| Ints9         |
| Canx          |
| Zbtb5         |
| Syde1         |
| Smc1a         |
| Trim13        |
| Zfp830        |
| Coq5          |
| Lrrc47        |
| Pea15a        |
| Zfp335os      |
| Mir761        |
| Timm44        |
| C2cd3         |
| D430001F17Rik |
| Emb           |
| Col6a3        |
| Rnf6          |
| Ppie          |
| Abhd16a       |
| Npffr1        |
| Prr36         |
| U2af1l4       |
| Rnf126        |
| Snx21         |
| Cited2        |
| Nol11         |
| Bok           |
| Dlst          |
| Uqcrh         |
| Uqcrc1        |
| Myh6          |
| Scn1b         |
| Wdr91         |
| Pigo          |
| Peg3          |
| Rcan2         |
| Plpp1         |
| Sumo3         |
| Ube2l6        |

|            |
|------------|
| Haghl      |
| Gfap       |
| Pnmal2     |
| Ice1       |
| Unc5c      |
| Rps9       |
| Trim62     |
| Tmem259    |
| Rbsn       |
| Sh3gl3     |
| Rps12-ps15 |
| Taf1c      |
| Igfbp1     |
| Cpne5      |
| Dlg3       |
| Zfp1       |
| Cherp      |
| Cd53       |
| Wipi2      |
| Psmb3      |
| Lpin2      |
| Pdim7      |
| Eml2       |
| Pex13      |
| Camk2g     |
| Trpm4      |
| Ubqln4     |
| Pdia6      |
| Nqo2       |
| Fgf11      |
| Magi2      |
| Pttg1      |
| Mfsd14b    |
| Ppil2      |
| Brd2       |
| Slc25a1    |
| Arl6ip6    |
| Arl3       |
| Nceh1      |
| Rab2a      |
| Srgap1     |
| Tex30      |
| Sst        |
| Habp4      |
| Tmsb15b1   |
| Hist1h2bg  |
| Zar1       |

|            |
|------------|
| Lars       |
| Pars2      |
| Tti2       |
| Vps37c     |
| Slc2a1     |
| Zfp788     |
| Rhbdd3     |
| Sncaip     |
| Ccdc17     |
| Cops7b     |
| Ngdn       |
| Cep170b    |
| Ssh1       |
| Ctnbp2nl   |
| Zmynd12    |
| Akap8l     |
| Eci2       |
| Mid1-ps1   |
| Scyl2      |
| Zc3h8      |
| Rps29      |
| Gpsm3      |
| Dhps       |
| Hist2h3c2  |
| Serinc1    |
| Ccne1      |
| Txndc16    |
| Rnf19b     |
| Zfp959     |
| Nxn        |
| Sephs2     |
| Uqcrh-ps1  |
| Lage3      |
| Maml1d1    |
| Rbm17      |
| Zfp667     |
| Mme        |
| Gnl3       |
| Fam96b     |
| Ubtf       |
| Ubl5       |
| Ramp3      |
| Enoph1     |
| Dpysl2     |
| Rpl31-ps14 |
| Clk2       |
| Cdo1       |

|           |
|-----------|
| Lipt2     |
| Ccdc58    |
| Ikzf5     |
| Fnbp1l    |
| Igsf3     |
| Rrm1      |
| Endov     |
| Rpl28-ps3 |
| Sh3rf3    |
| Cdc42bpb  |
| Tgfr2     |
| Fbxw2     |
| Zfp850    |
| Clybl     |
| Zfp746    |
| Tubgcp2   |
| Trim35    |
| Rab8a     |
| Esrrg     |
| Pnkp      |
| Them6     |
| Tgfbrap1  |
| Arhgap5   |
| Tomm5     |
| Bex1      |
| Sugp1     |
| Ppp2r3c   |
| Samd11    |
| Brcc3     |
| Washc5    |
| Ythdf2    |
| Tubb2b    |
| Slirp     |
| Psmc9     |
| Scamp3    |
| Gspt1     |
| Nf1       |
| Dcxr      |
| Syt4      |
| Ssrp1     |
| Usf2      |
| Prmt5     |
| Bloc1s3   |
| Zfp1      |
| AI854703  |
| Snx22     |
| Qdpr      |

|           |
|-----------|
| Nppc      |
| Bms1      |
| Zfp952    |
| Tufm      |
| Nckap1l   |
| Hyal3     |
| Unc45a    |
| Rnf31     |
| Nol6      |
| Rida      |
| Tmem97    |
| Cdv3-ps   |
| Uqcc3     |
| Srsf4     |
| Tpbgl     |
| Grip2     |
| Cdc16     |
| Bri3bp    |
| Pafah1b1  |
| Thap1     |
| Ogfod2    |
| Wbp4      |
| Cop1      |
| Dusp4     |
| Sco2      |
| Usp5      |
| Tceanc2   |
| Lmtk3     |
| Yae1d1    |
| Lrrc41    |
| Mtmr6     |
| AI837181  |
| Hist1h2bp |
| Nek4      |
| Ighj1     |
| Lrrc14    |
| Fuom      |
| Mettl25   |
| Vcpkmt    |
| Ubap2     |
| Mir7019   |
| Cav2      |
| Grsf1     |
| Nt5c1a    |
| Ttc9c     |
| Rpl17-ps5 |
| Scml4     |

|          |
|----------|
| Mpp1     |
| Dr1      |
| Gkap1    |
| Acvr2b   |
| Ube2i    |
| Rab4a    |
| Scn5a    |
| Srrm1    |
| Ube2l3   |
| Cd3eap   |
| Eid2b    |
| Nudt11   |
| Sptlc2   |
| Zfp90    |
| Rybp     |
| Wdr33    |
| Mon1b    |
| Otub1    |
| Zfp853   |
| Sar1b    |
| Mthfs    |
| Ak2      |
| Sarm1    |
| Dctn3    |
| Bscl2    |
| Cept1    |
| Spty2d1  |
| Zfp772   |
| Stk11ip  |
| Fcrls    |
| Hsd17b4  |
| Ripply2  |
| Dennd6b  |
| Psmc11   |
| Glo1     |
| Ntrk2    |
| Dhrs7b   |
| Max      |
| Bicdl1   |
| Glrx2    |
| Slc41a3  |
| Lsg1     |
| Rad54l   |
| Trappc3  |
| Usp46os2 |
| Dctn6    |
| Ggh      |

|          |
|----------|
| Arl6     |
| Odc1     |
| Rnaseh2c |
| Ddx52    |
| Trim45   |
| Ralgapb  |
| Pcdh8    |
| Snx24    |
| Stk24    |
| Uri1     |
| Irs4     |
| Sox4     |
| Immp2l   |
| Utrn     |
| Stt3a    |
| Frs3os   |
| Necab2   |
| Anp32-ps |
| Rbm22    |
| Hscb     |
| Cerk     |
| Dzank1   |
| Pole3    |
| Snrk     |
| Adam23   |
| Tmem184c |
| Fam81a   |
| Pick1    |
| Arl5a    |
| Vangl2   |
| Dock11   |
| Adal     |
| Ppp1r37  |
| Snapc3   |
| Tceal3   |
| Spag9    |
| Prps1l3  |
| Drd1     |
| Cish     |
| Gabra1   |
| Vsp35l   |
| Cstb     |
| Kcnc1    |
| Dlx6os2  |
| Nfkbia   |
| Arl8b    |
| Tfcp2    |



|            |
|------------|
| P2ry13     |
| Gapdh-ps14 |
| Mindy2     |
| Hbegf      |
| Sec13      |
| Fam214b    |
| Vgll4      |
| Glyr1      |
| Fnbp4      |
| Psme2b     |
| Stx8       |
| Xxylt1     |
| Capns1     |
| Fndc5      |
| Kcnu1      |
| Ppp1r14b   |
| Brd9       |
| Nsa2       |
| Moap1      |
| Efl1       |
| Rpp14      |
| Cx3cr1     |
| Ankrd37    |
| Dock3      |
| Ptcd1      |
| Cacng4     |
| Rab3a      |
| Zswim1     |
| Magi1      |
| Mettl27    |
| Dag1       |
| Bcl2l1     |
| Myo5a      |
| Fam49b     |
| Nedd8      |
| Rab11fip3  |
| Rnaseh2b   |
| Rragb      |
| Wdfy1      |
| Smyd2      |
| Med14      |
| Rab11b     |
| Eef2       |
| Ubqln1     |
| Cggbp1     |
| Xk         |
| Szrd1      |

|               |
|---------------|
| Atp6ap2       |
| Cckbr         |
| Nudcd3        |
| Cryl1         |
| Cnpy2         |
| Rpl36-ps10    |
| Slc25a33      |
| Lrrc59        |
| Thap7         |
| Gpsm1         |
| Hapln4        |
| Prdx4         |
| Eif2s3x       |
| Hlcs          |
| Sp3os         |
| Fh1           |
| B930082K07Rik |
| Mrm3          |
| Rabggta       |
| Hs3st2        |
| Ccdc87        |
| Tmtc4         |
| Cct6a         |
| Togaram1      |
| Xrcc3         |
| Sfr1          |
| Mybl1         |
| Ppfia3        |
| Rfc4          |
| Rnf166        |
| Rnf168        |
| Tram1l1       |
| Jakmip1       |
| Mdm1          |
| Plekhb2       |
| Cartpt        |
| Tspan3        |
| Grik1         |
| C2cd2         |
| Cadm1         |
| Mdrl          |
| Trnt1         |
| Slc45a1       |
| Rab34         |
| Creld2        |
| Acbd6         |
| Ttc7b         |

|            |
|------------|
| Xylt2      |
| Ddx3x      |
| Ero1lb     |
| Tvp23b     |
| Sh2b2      |
| Arrb2      |
| Dhrs11     |
| Whamm      |
| Lars2      |
| Zfp521     |
| Flii       |
| Rps8       |
| A1504432   |
| Lrfn4      |
| Trnau1ap   |
| Dhrs13     |
| Sdf4       |
| Slc12a5    |
| Begain     |
| Zfhx3      |
| Pcdh18     |
| Ykt6       |
| Dlgap4     |
| Scn1a      |
| Phf20-ps   |
| Ccdc32     |
| Gne        |
| Tcim       |
| Fancl      |
| Tctn3      |
| Tfb2m      |
| Igfbp4     |
| Cacna1b    |
| Exosc10    |
| Mthfd1l    |
| Unc50      |
| Mtpap      |
| Lemd3      |
| Gars       |
| Ccser1     |
| Phf10      |
| Tab3       |
| Edem1      |
| Fkbp15     |
| Smc6       |
| Tmem262    |
| Rpl31-ps11 |

|               |
|---------------|
| Gak           |
| Herpud2       |
| Cmas          |
| Psmc6         |
| Npl           |
| Cenpv         |
| Nus1          |
| I830077J02Rik |
| Banf1         |
| D330023K18Rik |
| Ndufs7        |
| Raly1         |
| Trpc4ap       |
| Atp5h         |
| Hacd3         |
| Fkrp          |
| Ndufa9        |
| Sesn2         |
| Ilf3          |
| Reln          |
| Pag1          |
| Atp5k-ps2     |
| Poll          |
| Alas1         |
| Prkci         |
| Zfp260        |
| Ghr           |
| Rpl22-ps1     |
| Rpl34-ps2     |
| BC051226      |
| Isca1         |
| Rpl26         |
| Rpl31-ps4     |
| Stk19-ps1     |
| Zfp821        |
| Mrpl52        |
| Rer1          |
| C77080        |
| Usp30         |
| Gas2l1        |
| Cyhr1         |
| Csrnp3        |
| Lrpprc        |
| Carmil2       |
| Trappc2l      |
| F2r           |
| Mtmr3         |

|             |
|-------------|
| Pantr1      |
| Decr2       |
| Fem1c       |
| Rps11-ps1   |
| Trim3       |
| Zfp961      |
| Stk32a      |
| Wrb         |
| Fastkd2     |
| Nsun2       |
| Rpl23a-ps14 |
| Cope        |
| Gadd45g     |
| Naa38       |
| Anp32b      |
| Tuba1b      |
| Mfsd12      |
| Trmt10b     |
| Mapre3      |
| Rbx1-ps     |
| Emc8        |
| Siah3       |
| Ahcy        |
| Far2        |
| Mir6244     |
| Ndufs2      |
| Arsa        |
| Ghitm       |
| Mtg1        |
| Strip1      |
| Sms         |
| Dhx37       |
| Bmp2k       |
| Uros        |
| Elavl2      |
| Pifo        |
| Taf6        |
| Eif4g3      |
| Qrfpr       |
| Zfp617      |
| Afmid       |
| Akap5       |
| Pet100      |
| Tbccd1      |
| Taf13       |
| Sat1        |
| Imp3        |

|           |
|-----------|
| Kcnk1     |
| Phyh      |
| Rps19     |
| Srrm2     |
| Nfatc2    |
| Traf3ip1  |
| Mus81     |
| Itfg2     |
| Kmt2e     |
| Dusp12    |
| Srp19     |
| Mir6903   |
| Ubxn6     |
| Rps15-ps2 |
| Cdh2      |
| Vdac2     |
| Ece1      |
| Pdcl3     |
| Chsy1     |
| Leng9     |
| Chmp4b    |
| Nfyc      |
| Gmppb     |
| Tmem191c  |
| Glis2     |
| Nr1d1     |
| Anapc4    |
| Rnf146    |
| Tmem150b  |
| Zfp467    |
| Hspd1-ps3 |
| Cnot9     |
| Ddt       |
| Cacnb4    |
| Slc39a3   |
| Wdr41     |
| Bphl      |
| Hist1h2ao |
| Psemb10   |
| Dnmt1     |
| Gpalpp1   |
| Smg8      |
| Mir692-3  |
| Npb       |
| Zfp213    |
| Agtrap    |
| Trmt1l    |

|            |
|------------|
| Armc7      |
| Ggt7       |
| Ss18l1     |
| Traf7      |
| Sos1       |
| Slitrk1    |
| Chrm4      |
| Mitd1      |
| Cfap300    |
| Nudt19     |
| Dnaja3     |
| Fbxl21     |
| Mxd1       |
| Foxp3      |
| Cort       |
| Vezf1      |
| Phkb       |
| Chmp7      |
| Gdf11      |
| Tmem205    |
| Ccar2      |
| Fam185a    |
| Usb1       |
| Cdc42ep3   |
| Epdr1      |
| Eil2       |
| Tmem246    |
| Smim18     |
| Tnfaip8l3  |
| Cct7       |
| Wwc2       |
| Ppp1r2-ps6 |
| Ttc30a2    |
| Sdsl       |
| Slc9a7     |
| Csdc2      |
| Dmwd       |
| Vat1       |
| Tdpx-ps1   |
| Zfp580     |
| Plcd3      |
| Ppard      |
| Rmi1       |
| Slc14a2    |
| Trim23     |
| Zfp426     |
| Mrpl13     |

|             |
|-------------|
| Klhdc3      |
| Pik3r1      |
| Grpr        |
| Rpl21-ps13  |
| Scamp5      |
| Taco1os     |
| Luzp1       |
| Nisch       |
| Phospho2    |
| Jtb         |
| Rpl17-ps9   |
| Rpl10a-ps1  |
| Maged1      |
| Fip1l1      |
| Osbpl7      |
| Odf2        |
| Rhof        |
| Bri3        |
| Ano1        |
| B4galt3     |
| Rnf130      |
| Cda         |
| Klhdc1      |
| Fytd1       |
| Kat7        |
| Nipsnap3b   |
| Zfp346      |
| Mir22       |
| Entpd6      |
| Mtrr        |
| Klf8        |
| Nhp2        |
| Smim8       |
| Oxld1       |
| Fam219a     |
| Exosc5      |
| Tmem234     |
| Emilin2     |
| Med25       |
| Cbfa2t2-ps1 |
| Brf2        |
| Lrrtm2      |
| Slc35f4     |
| Polr3b      |
| Pde6d       |
| Scn2b       |
| Fam98b      |



|           |
|-----------|
| Mvk       |
| Mapk8ip1  |
| Clpx      |
| Itgb3bp   |
| Sstr2     |
| Ddx25     |
| Ints14    |
| Rhoa      |
| Rrp15     |
| Trem2     |
| Kctd2     |
| Rps12l1   |
| Efna5     |
| Asf1a     |
| Iah1      |
| P2ry6     |
| Dapp1     |
| Arl6ip4   |
| Zfp114    |
| Col25a1   |
| Tnpo2     |
| Ccdc90b   |
| Dbnnd2    |
| Larp1     |
| Rps6ka6   |
| Polr1c    |
| Lgr4      |
| Mlst8     |
| Gps1      |
| Sdc3      |
| Rps10-ps1 |
| Zfp398    |
| Rad51c    |
| Calb1     |
| Amt       |
| Rps17     |
| Pdcd7     |
| Aatf      |
| Ptger4    |
| Zbtb7c    |
| AK157302  |
| Fndc4     |
| Rere      |
| Zscan21   |
| Ocel1     |
| Wdr53     |
| Metap2    |

|               |
|---------------|
| E130311K13Rik |
| Mul1          |
| Agpat4        |
| Rpsa-ps11     |
| B3galt6       |
| Slc3a1        |
| Abhd8         |
| Rps2-ps6      |
| Ube2d1        |
| Suz12         |
| Dnajc4        |
| Mff           |
| Lrrc28        |
| Ftsj1         |
| Tomm20        |
| H2afv         |
| Yrdc          |
| Asic4         |
| Aimp2         |
| Noa1          |
| Zbtb48        |
| Cyb561        |
| Panx1         |
| Nrbp1         |
| Ccdc92b       |
| Armcx5        |
| Emc10         |
| C9orf72       |
| Kcna3         |
| Kcnh6         |
| Pxylp1        |
| Zdhhc1        |
| L2hgdh        |
| Epb41l3       |
| Tfg           |
| Fam205a3      |
| Psma3         |
| Cep57         |
| Psmg1         |
| Vps29         |
| Eif2b3        |
| Lsm3          |
| Mir5133       |
| Golph3        |
| Zfp512        |
| Polr3d        |
| Trp53rka      |

|            |
|------------|
| Ulk3       |
| Rcor2      |
| Cyb5d2     |
| Nfkb1      |
| B9d1       |
| Axin1      |
| Pex16      |
| Nudt22     |
| Sncg       |
| Dvl2       |
| Copg1      |
| Bcl7b      |
| Ptgr2      |
| Snhg3      |
| Mettl23    |
| Pgm3       |
| Atp13a2    |
| Carm1      |
| Mtag2      |
| Zfp651     |
| Gsr        |
| Mecp2      |
| Rpl36      |
| Sult4a1    |
| Nop2       |
| B3gnt4     |
| Ptpn4      |
| Gpr162     |
| Whrn       |
| Zfp882     |
| Xpo7       |
| Car15      |
| Cyp4f16    |
| Zfp759     |
| Git2       |
| Ndufb10    |
| Aldh1b1    |
| Inha       |
| Actg-ps1   |
| Rhbd3      |
| Ly96       |
| Rapgef3os1 |
| Dnajc10    |
| Ndufb4     |
| Rps6kl1    |
| Pdhx       |
| Mapk8      |

|           |
|-----------|
| Mgat1     |
| Arl2bp    |
| Adgra1    |
| Terf2     |
| Mtus1     |
| Nme2      |
| Trim36    |
| Rbm42     |
| Elof1     |
| Lym1      |
| Cln8      |
| Fam136a   |
| Ncoa3     |
| Cul4b     |
| Fam173a   |
| Wasf2     |
| Thoc6     |
| Tll5      |
| Hist1h2br |
| Gucy1a1   |
| Rhbdd2    |
| Tmem143   |
| Zfp518b   |
| Spata25   |
| Klf6      |
| Synj2bp   |
| Tdrd7     |
| Zfp790    |
| Psm6      |
| Slc36a4   |
| Rsrc2     |
| Secisbp2  |
| Zbtb21    |
| Prickle4  |
| Rimbp2    |
| Slc19a2   |
| Map4      |
| Lztr1     |
| Blzf1     |
| Mllt6     |
| Mrpl9     |
| Sfxn1     |
| Ip6k1     |
| Cmip      |
| Fbxl2     |
| Bin1      |
| Pkib      |

|           |
|-----------|
| Fcgr1     |
| Lamb1     |
| E2f6      |
| Srgap2    |
| Elk3      |
| Hspb8     |
| Mrps18b   |
| B3galnt1  |
| Doc2g     |
| Vip       |
| Ptprt     |
| Mrps34    |
| Hdac6     |
| Pdyn      |
| Napg      |
| Mfng      |
| Ppp2r2d   |
| Rnaset2a  |
| Wdr70     |
| Zfp629    |
| Tbc1d13   |
| Spr       |
| Ankmy2    |
| Paics     |
| Zfp13     |
| Fbxo21    |
| Pcid2     |
| Rtn1      |
| Nutf2-ps1 |
| Bub3      |
| Umps      |
| Rsph9     |
| Plp2      |
| Tnfaip8l2 |
| Zfp319    |
| Zfp768    |
| Hist1h4a  |
| Cxcl14    |
| Rpl10a    |
| Rbbp7     |
| Rgl2      |
| Foxg1     |
| Iqce      |
| Slc30a9   |
| Sp140     |
| Slx1b     |
| Cd180     |

|           |
|-----------|
| Rita1     |
| Cdkl1     |
| Spock1    |
| Adprh     |
| Tmem178   |
| Dap       |
| Itgam     |
| Ift140    |
| Coa3      |
| Simc1     |
| Hmgb1-ps4 |
| Myl12b    |
| Bbs2      |
| Lrfn1     |
| Eapp      |
| Abcd1     |
| Ndufaf6   |
| Zfp658    |
| Josd2     |
| Hist1h4j  |
| Prmt8     |
| Tacc2     |
| Pfdn5     |
| Rps27     |
| Pim2      |
| Slc7a6os  |
| Arf5      |
| Tbc1d16   |
| Dnm3      |
| Ptprm     |
| Acat1     |
| Zmat2     |
| Coa7      |
| Lyplal1   |
| Rbfa      |
| Srpr      |
| Tpi1      |
| Atxn2l    |
| Tmem115   |
| Ap2s1     |
| Rhot2     |
| Polr2e    |
| Dscam     |
| Pkm       |
| Pomk      |
| Spcs1     |
| Arhgef12  |

|               |
|---------------|
| Hist1h2af     |
| Hpf1          |
| Rgs20         |
| Stk19         |
| Pdia4         |
| Ttc1          |
| E430018J23Rik |
| Ift172        |
| Pias3         |
| Borcs7        |
| Fbxo3         |
| Zfp275        |
| Slc25a35      |
| Chid1         |
| Egr1          |
| Ephb2         |
| Elmod1        |
| Zfp235        |
| Dynlt1c       |
| Psm6          |
| Paxx          |
| Rnf141        |
| Nubp2         |
| Ppp1r2-ps1    |
| Zdhhc8        |
| Matn2         |
| Sema3c        |
| Cnbd2         |
| Shc3          |
| Usp51         |
| Mrap2         |
| Serinc3       |
| Mafb          |
| Fbxo41        |
| Mthfd2        |
| Commd10       |
| Erh           |
| Mea1          |
| Zmynd8        |
| Dazap1        |
| Slc25a26      |
| Gnpda2        |
| Ldoc1         |
| Eif2ak1       |
| Lamtor4       |
| Zfp36         |
| Osbpl2        |

|           |
|-----------|
| Tceal8    |
| Fam57b    |
| Snrpc     |
| Mrpl24    |
| Snrnp27   |
| Nrip3     |
| Dusp8     |
| Ext2      |
| Mfn2      |
| Fhit      |
| Ptges3    |
| Alg2      |
| Cdk9      |
| Tmx1      |
| Mbtps1    |
| Pgam1     |
| Chmp1a    |
| Pik3cg    |
| Arhgef40  |
| Nprl2     |
| Mir8099-1 |
| Ripor2    |
| Slmap     |
| Usp42     |
| Adarb1    |
| Kbtbd3    |
| Wbp2      |
| Tmem69    |
| Negr1     |
| Rpl17     |
| Sri       |
| Zfp3      |
| Ess2      |
| Map4k3    |
| Zfp523    |
| Gpr4      |
| Uchl5     |
| Preld3b   |
| Fitm2     |
| Ing1      |
| Setd7     |
| Adssl1    |
| Ablim1    |
| Cd164l2   |
| Mrpl32    |
| Chn2      |
| Chchd1    |



|          |
|----------|
| Srsf7    |
| Ppp2r5d  |
| Dok4     |
| Cdr2     |
| Zfp575   |
| Polr2d   |
| Klh14    |
| Maneal   |
| Ephx4    |
| Tpgs1    |
| Dcaf12   |
| Pld4     |
| Tnrc6a   |
| Zbtb41   |
| Fbxl15   |
| Myg1     |
| Zfp672   |
| B4gat1   |
| Rbm7     |
| Hist1h1c |
| Wdr48    |
| Plppr5   |
| Pard6g   |
| Rnf114   |
| Tkt      |
| Uso1     |
| Snx3     |
| Phf6     |
| Arhgap33 |
| Gramd2   |
| Txndc9   |
| Apoa2    |
| Ccdc115  |
| Timm29   |
| B4galt6  |
| Tmem134  |
| Zfp65    |
| Adra2a   |
| Saraf    |
| Acaca    |
| Rbm14    |
| Cul4a    |
| Psmc13   |
| Ccny     |
| Nme4     |
| Clec2l   |
| Nkain3   |

|               |
|---------------|
| Cisd1         |
| Mir331        |
| Lcp2          |
| Vapa          |
| Trmt2a        |
| Anapc11       |
| Tmem169       |
| Timm8a1       |
| Cdc42         |
| Stard10       |
| Smim20        |
| Fam169a       |
| E530011L22Rik |
| Nle1          |
| Slc25a3       |
| Arfgap2       |
| Gnl3l         |
| Ctbp1         |
| Med20         |
| Gap43         |
| Sumo1         |
| Mbd2          |
| Dph7          |
| Clcn3         |
| Rpl35a-ps3    |
| Ube2j1        |
| Tmem208       |
| Ddx23         |
| Ndr3          |
| Nr4a1         |
| Zfp608        |
| Cux2          |
| Lrpap1        |
| Nalcn         |
| Ambra1        |
| Rps12-ps6     |
| Alkbh5        |
| Pard6a        |
| Pcdhb7        |
| Nsmce1        |
| Ahi1          |
| Mrps11        |
| Atp5b         |
| Parvb         |
| Depdc5        |
| Cryz1         |
| Gba           |

|            |
|------------|
| Ehmt2      |
| Tssc4      |
| Fam220-ps  |
| Fxyd7      |
| Osbpl9     |
| Pcdh11x    |
| Rarb       |
| Slc16a14   |
| Retreg2    |
| B3glct     |
| Ube2r2     |
| Hps4       |
| Clic1      |
| Lmna       |
| Cdc14b     |
| Chmp2b     |
| Sh3yl1     |
| Sgtb       |
| Ywhab      |
| Capn2      |
| Timm50     |
| Atg9b      |
| Map3k12    |
| St6gal1    |
| Rpl10-ps3  |
| Mtif2      |
| Tmsb15l    |
| Btrc       |
| Tubb4b-ps1 |
| Tmem62     |
| Arl4a      |
| Lyz2       |
| Ppcs       |
| Sec31a     |
| Tmem215    |
| Golga7     |
| Orc6       |
| Azin2      |
| Lgals1     |
| Tdp1       |
| Zfp449     |
| Plekha3    |
| Eif4e      |
| Ftl1-ps2   |
| Madd       |
| Raf1       |
| Pxk        |

|          |
|----------|
| Cacna2d2 |
| Cacna1i  |
| Vasp     |
| Sdhb     |
| Abl1     |
| Zbtb9    |
| Osbp     |
| Zfp706   |
| Akap17b  |
| Siglech  |
| Dis3l2   |
| Cnpy4    |
| Nagk     |
| Bcas3    |
| Rbm10    |
| Pwwp2b   |
| Pacs1    |
| Inpp5a   |
| Tapbp1   |
| Bak1     |
| Iqsec3   |
| Tsta3    |
| Stat2    |
| Ttpal    |
| Zmat1    |
| Rnf152   |
| Mmab     |
| Prkar2b  |
| Rps12    |
| Fuca2    |
| Pde10a   |
| Sdad1    |
| Pex2     |
| Prpf31   |
| Rab3c    |
| Dld      |
| Nit1     |
| Riox1    |
| Sugp2    |
| Casp8    |
| Ift57    |
| Cmtm3    |
| Rpl3-ps1 |
| Ube4b    |
| Slc1a6   |
| Gtf2ird2 |
| Eif1     |

|               |
|---------------|
| Tmeff1        |
| Med28         |
| Kif21b        |
| Ssbp3         |
| Ppil3         |
| Cnot10        |
| Tbc1d9b       |
| Igsf10        |
| Nr2f2         |
| Pms2          |
| Tagln2        |
| Tmed2         |
| Ifit1b1       |
| Ddx21         |
| Calm1         |
| Cdh8          |
| Hspa1l        |
| Rpl36a-ps3    |
| Tapbp         |
| Tent5a        |
| Pafah1b3      |
| Rab36         |
| Atp8b2        |
| Ier3ip1       |
| Rtl5          |
| Trub2         |
| Wdr75         |
| Plekha6       |
| Nlk           |
| Pdhb          |
| Sla           |
| Ndufb8        |
| Acbd4         |
| Ttc17         |
| Rnf8          |
| Jazf1         |
| Pde3b         |
| Xrcc1         |
| Selenos       |
| C430014B12Rik |
| Acaa1a        |
| Mxra7         |
| Tcerg1        |
| Eepd1         |
| Psmc2         |
| Dlx6          |
| Tbc1d7        |

|               |
|---------------|
| Brox          |
| Snw1          |
| Mdh2          |
| Dhx29         |
| Mir6973b      |
| Ntng1         |
| Glce          |
| Ppp2r2b       |
| Dchs1         |
| Abcb9         |
| Zfp868        |
| Alg9          |
| Lbhd2         |
| Hist2h4       |
| Zfp105        |
| B130046B21Rik |
| Gale          |
| Cops6         |
| Tpra1         |
| Prcc          |
| Senp6         |
| Tcta          |
| Tmem186       |
| Tspan5        |
| Rad9a         |
| Crkl          |
| Ppp1r12c      |
| Vrk3          |
| Tmem240       |
| Lnx1          |
| Rps12-ps9     |
| Zfp622        |
| Rpl37rt       |
| Cyp51         |
| Fam171a1      |
| Cdk20         |
| Ufsp1         |
| Raver1        |
| Nol3          |
| Rfk           |
| Bad           |
| Clip3         |
| Fgf16         |
| Zswim3        |
| Ap2a2         |
| Gpr83         |
| Tmbim6        |

|            |
|------------|
| Cables2    |
| Medag      |
| Fgd1       |
| Gar1       |
| Ptcd3      |
| Cd63       |
| Cspg5      |
| Ogdh       |
| Pgam1-ps1  |
| Desi1      |
| Reps1      |
| Rit1       |
| Pcyox1     |
| Tinf2      |
| Wee1       |
| Zmym3      |
| Sox2       |
| Zfp944     |
| Swap70     |
| Enpp5      |
| Ndufa11b   |
| Kctd21     |
| Cyb561a3   |
| Rpap3      |
| Araf       |
| Polr3e     |
| Mvb12b     |
| Ddx50      |
| Prorsd1    |
| Pdcd6ip    |
| Cnot2      |
| Pced1a     |
| Ncf2       |
| Kcng4      |
| Pecr       |
| Tlnrd1     |
| Hist2h2aa1 |
| Dusp10     |
| Brd7       |
| Setd1b     |
| Skiv2l2    |
| Ankrd26    |
| Tmx3       |
| Dpagt1     |
| Armh3      |
| Agap1      |
| Ints12     |

|               |
|---------------|
| Klh26         |
| Hgh1          |
| Uck1          |
| Rnf26         |
| Tm9sf2        |
| Xpr1          |
| Lrrc75b       |
| Mad2l1bp      |
| Slco2b1       |
| Zfp958        |
| Mgat5b        |
| Otulinl       |
| Ccdc9         |
| Etaa1         |
| Prkar1a       |
| Eif2b4        |
| Hes6          |
| Rnft2         |
| D730003I15Rik |
| Synj1         |
| Aco1          |
| Zbtb14        |
| Taldo1        |
| Dlc1          |
| Ofd1          |
| Hspa4         |
| Dleu7         |
| Zfp770        |
| Cdk5rap2      |
| Riok1         |
| Sgsm3         |
| Srrd          |
| Top1          |
| Fut11         |
| Lyl1          |
| Gstm5         |
| Sulf2         |
| Slc22a23      |
| Dgat1         |
| St8sia5       |
| Eif3a         |
| Nr1h2         |
| Ppp1r15a      |
| Mir7000       |
| Fam91a1       |
| Disp3         |
| Trappc2       |



|            |
|------------|
| Adat2      |
| Hdac11     |
| Smim7      |
| Ankfn1     |
| Fam133b    |
| Fubp1      |
| Chst10     |
| Aldoa      |
| Ankrd35    |
| Acot8      |
| Mir8104    |
| Spx        |
| Zfp995     |
| Snupn      |
| Ash2l      |
| Tbl1x      |
| Pgls       |
| Tom1       |
| Chrm2      |
| Rab13      |
| Hsd3b3     |
| Amd2       |
| Tmem202    |
| Exog       |
| Pcdhgc4    |
| Akap7      |
| Myo18a     |
| Cntnap2    |
| Srsf2      |
| Vat1l      |
| Ndufaf4    |
| Timm22     |
| Npepps     |
| Ecd4       |
| Hist1h2ah  |
| Rhov       |
| Wdr37      |
| Ccdc136    |
| Xpo5       |
| Hist1h2ab  |
| Rpl30-ps10 |
| Dnajc28    |
| Glt1d1     |
| Selplg     |
| Hccs       |
| Arhgef6    |
| Dync2li1   |

|               |
|---------------|
| Kat6a         |
| Churc1        |
| Ciao1         |
| Rassf8        |
| Tcea1-ps1     |
| Zcchc10       |
| Ap3m2         |
| Plcg1         |
| Rpl36al       |
| Phlda1        |
| Usp36         |
| B230364G03Rik |
| Eif1ad        |
| Csnk1d        |
| Bhlhb9        |
| Il2           |
| Rpl31-ps17    |
| Sec22b        |
| Pogz          |
| Igdcc4        |
| Mzt1          |
| Entpd1        |
| Prkcd         |
| Rnase4        |
| Exosc7        |
| Vwc2          |
| Oxtr          |
| Gnaz          |
| Mast2         |
| Ldha          |
| Sdhaf4        |
| Grc10         |
| Cul1          |
| Kif3a         |
| St3gal3       |
| Rpap2         |
| Eif4a1        |
| Cldn12        |
| Slain1        |
| Isoc2a        |
| Lrch1         |
| Med30         |
| Rpl32         |
| Slc25a28      |
| Pdcd5         |
| Ndst2         |
| Smim12        |

|            |
|------------|
| Cenpt      |
| Ywhag      |
| Rps12-ps12 |
| Unc93b1    |
| Grin3a     |
| Hsd17b12   |
| Egfl8      |
| Hnrnpul2   |
| Nif3l1     |
| Fam71e1    |
| Surf6      |
| Sec61a2    |
| Gnb4       |
| Gdap2      |
| Rpgrip1    |
| Dcbld2     |
| Naglu      |
| Atp5l2-ps  |
| Rcan3      |
| Mcub       |
| Slc25a46   |
| Fam122a    |
| Tbcd       |
| Smad2      |
| Vwa8       |
| Nr1i3      |
| Raly       |
| Tbc1d25    |
| Trappc9    |
| Pdzd2      |
| Arxes1     |
| Hist1h3a   |
| Foxr2      |
| Rpl19-ps1  |
| Trpc1      |
| Mrpl50     |
| Evi5l      |
| Srrm4      |
| Crk        |
| Atp6v0d1   |
| Polr3k     |
| Tpt1-ps5   |
| Dennd4b    |
| Rpl21-ps3  |
| Sgip1      |
| Dpf1       |
| Ccdc153    |

|               |
|---------------|
| Hacd1         |
| Insyn1        |
| Hilpda        |
| Hdhd2         |
| Rtl10         |
| Baiap3        |
| Rsph3a        |
| Ndufs5        |
| Tmem175       |
| Ino80b        |
| Dynll2        |
| C330018D20Rik |
| Akr7a5        |
| Parn          |
| Nudt3         |
| Resp18        |
| Pgrmc1        |
| Asna1         |
| Reep5         |
| Uap1          |
| Pfkm          |
| Ltc4s         |
| Ccna1         |
| Wdr12         |
| Ormdl1        |
| Ptch1         |
| Tmem94        |
| Ccdc12        |
| Ei24          |
| Kpna3         |
| Rab43         |
| Elac2         |
| Fbxo28        |
| Rp9           |
| Arhgef10l     |
| Ckmt1         |
| Galnt1        |
| Eif1a         |
| Osbp2         |
| Lpcat1        |
| Urm1          |
| Pcsk7         |
| Stk11         |
| Gripap1       |
| Fxn           |
| Mtmr14        |
| Fam168b       |

|          |
|----------|
| Tmem126b |
| Zmynd11  |
| Mrm1     |
| Cyb5b    |
| Ddx41    |
| Fam189b  |
| Gfpt2    |
| Bmyc     |
| Zfp655   |
| Fam196a  |
| Bola1    |
| Ifi2712a |
| Gpr27    |
| Inafm1   |
| Wdfy3    |
| Cmpk2    |
| Kcnk3    |
| Gorasp2  |
| Ndufv3   |
| Zfp800   |
| Rsb1     |
| Mmp15    |
| Nsun4    |
| Ube2q2   |
| Mpeg1    |
| Hsf2     |
| Cybc1    |
| Mir30d   |
| Csk      |
| Phtf1    |
| Rgs7     |
| Zfp955a  |
| Klhdc8b  |
| Amd-ps1  |
| Ankrd55  |
| Hist1h4n |
| Cyth2    |
| H3f3b    |
| Rps23    |
| Elp2     |
| Ppat     |
| Pgp      |
| Mrps21   |
| Gng4     |
| Malsu1   |
| Pcna-ps2 |
| Bend4    |

|          |
|----------|
| Lrrc8b   |
| Nipsnap1 |
| Cpsf7    |
| Taf8     |
| BC030500 |
| Khk      |
| Cdkn2d   |
| Acbd7    |
| Vps16    |
| Wdr43    |
| Ubl4a    |
| Cdk13    |
| H3f3a    |
| Rnf13    |
| Nanos3   |
| Ifnar1   |
| Rps10    |
| Ppt1     |
| Dctpp1   |
| Mapk6    |
| Nat14    |
| Haus1    |
| Samm50   |
| Sfxn3    |
| Slc35e4  |
| Map2k4   |
| Cox7c    |
| Adgra3   |
| Zpr1     |
| Stx17    |
| Ttc33    |
| Usp8     |
| Alox5ap  |
| Cwc15    |
| Rsl1d1   |
| Gnai1    |
| Sema4a   |
| Arel1    |
| Fosb     |
| Etv6     |
| Rom1     |
| Nmnat2   |
| Zfp560   |
| Uvrags   |
| Ndufb9   |
| Nelfb    |
| Klhl29   |

|            |
|------------|
| Foxk2      |
| Zadh2      |
| Commd5     |
| Osgep      |
| Klhdc10    |
| Rpl6       |
| Acp4       |
| Bpnt1      |
| Map3k4     |
| Pdzd11     |
| Hyal2      |
| Nnat       |
| Exoc1      |
| Ptptra     |
| Fbxl14     |
| Fchsd2     |
| Nufip1     |
| E2f4       |
| Slc23a2    |
| Fam120aos  |
| Foxn3      |
| Mypop      |
| Ly86       |
| Prmt2      |
| Prr7       |
| Dguok      |
| Cd83       |
| Med6       |
| Kcnc4      |
| Bcl10      |
| Papd4      |
| Vps36      |
| Mrpl49     |
| Dgkg       |
| Celf6      |
| Prdx1      |
| Zfp317     |
| Izumo4     |
| Dnm1       |
| Set        |
| Zfp712     |
| Ptprr      |
| Gyg        |
| Zmat4      |
| Rps12-ps11 |
| Spsb4      |
| Supt3      |

|           |
|-----------|
| Cbx8      |
| Eva1c     |
| Fzr1      |
| Tm7sf2    |
| Ccdc38    |
| L3mbtl3   |
| Pycr2     |
| Klhl32    |
| Cby1      |
| Ivns1abp  |
| Zdbf2     |
| Epb41l4b  |
| Zc3h15    |
| Terf2ip   |
| Tmem91    |
| Mpnd      |
| Rph3a     |
| Galns     |
| Osgin2    |
| Rps25     |
| Ctnnbip1  |
| Pex11b    |
| St13      |
| Ppan      |
| Flot1     |
| Gadd45a   |
| Cdc37l1   |
| Cse1l     |
| Haus8     |
| Slc25a14  |
| Mief2     |
| Lsm14a    |
| Cks1b     |
| Nub1      |
| Bnip3     |
| Pdim3     |
| Dnttip1   |
| Cdkl3     |
| Rpl3-ps2  |
| Hmgb1-ps7 |
| Platr17   |
| Npas4     |
| Chl1      |
| Trhde     |
| Ulk2      |
| Slc39a7   |
| Wdr5      |



|          |
|----------|
| Atp6v0a2 |
| Iqcc     |
| Tmem60   |
| Zfp777   |
| Lonp1    |
| Khdrbs2  |
| Mtf1     |
| Srp54c   |
| Ugcg     |
| Znhit2   |
| Necap2   |
| BC031181 |
| Sart1    |
| Masp1    |
| Asic2    |
| Pspc1    |
| Scly     |
| Rps2-ps4 |
| Nmt2     |
| Bag1     |
| Btbd19   |
| Ccdc82   |
| Zfp512b  |
| Anapc16  |
| Trim27   |
| Prune2   |
| Znfx1    |
| Tubgcp6  |
| Gtpbp4   |
| Arhgap25 |
| Cdh20    |
| Btf3l4   |
| Neto1    |
| Wfdc18   |
| Mecr     |
| Dedd2    |
| Rpusd1   |
| Lsm1     |
| Vta1     |
| Sez6     |
| Zfp810   |
| Tspyl1   |
| Zfp341   |
| Hist1h1e |
| Timp2    |
| Txndc12  |
| Ankrd17  |

|            |
|------------|
| Marcks1    |
| Atp2c1     |
| Mtrf1      |
| Clmp       |
| Larp6      |
| Smarca5-ps |
| Babam2     |
| Pdzd4      |
| Rdh13      |
| Clasp2     |
| Bicral     |
| Arhgap26   |
| Abcb10     |
| Park7      |
| Chtop      |
| Zbtb8os    |
| Gnpat      |
| Dnajc12    |
| Otulin     |
| Mrpl30     |
| Slc33a1    |
| Tprn       |
| Sub1       |
| Btbd6      |
| Yeats4     |
| Rps24-ps2  |
| Mrpl40     |
| Mex3c      |
| Dcaf1      |
| Sowahb     |
| Epb41l1    |
| Zfp689     |
| Ppp2cb     |
| Creb3      |
| Kcnab3os   |
| Slc7a3     |
| Fam177a    |
| Usp10      |
| Tmem263    |
| Rnf123     |
| BC005624   |
| Ubap2l     |
| Pcdhb15    |
| Phb        |
| Cnm3       |
| Aen        |
| Sirt2      |

|               |
|---------------|
| D330041H03Rik |
| Atraid        |
| Psm1          |
| Rpl36a-ps1    |
| Rplp1         |
| Sobp          |
| Jagn1         |
| Rpl38         |
| Cd164         |
| Rnf181        |
| Vcp-rs        |
| Csrp2         |
| Coasy         |
| Slc18a2       |
| Oat           |
| Zfp931        |
| Apbb1         |
| Brinp2        |
| Rnf219        |
| Mir147        |
| Hmox2         |
| Pex14         |
| Zfp607b       |
| Fam13b        |
| Selenok-ps1   |
| Ikbkap        |
| Sidt2         |
| Cds1          |
| Surf4         |
| Lzts2         |
| Vma21         |
| Rps19-ps4     |
| Fam120c       |
| Fam205a1      |
| Vash1         |
| Akain1        |
| Crhr1         |
| Alkbh7        |
| Wipf2         |
| Dhx35         |
| Pelo          |
| Lrwd1         |
| Aifm2         |
| Smoc1         |
| Ddx28         |
| Prim2         |
| Lrsam1        |

|           |
|-----------|
| Msl3      |
| Ift74     |
| Eif4a3    |
| Pigp      |
| Taf11     |
| Rps26-ps1 |
| F8a       |
| Dnajc19   |
| Armh4     |
| Abraxas2  |
| Rmdn3     |
| Chp1      |
| Vps45     |
| Esd       |
| Tpm1      |
| Xpot      |
| Comt      |
| Hexa      |
| Unc119b   |
| Rnf128    |
| Zfp719    |
| Gys1      |
| Dffa      |
| Dapk1     |
| Gabbr1    |
| Clcn1     |
| Rpp40     |
| Cbwd1     |
| Hps6      |
| Nxph1     |
| Ankrd45   |
| Rimk1a    |
| Rps4x     |
| Rbmx      |
| Anapc13   |
| Snx5      |
| Rab33a    |
| Sae1      |
| Snap25    |
| Tceal1    |
| Zfp740    |
| Pnpo      |
| Dglucy    |
| Afg1l     |
| Ptdss1    |
| Fhod1     |
| Zfp61     |

|               |
|---------------|
| Ptpdc1        |
| Phf23         |
| Chml          |
| Snrnp40       |
| Chac1         |
| Gpr12         |
| Pdik1l        |
| Pnrc1         |
| Oxsm          |
| Sh2d3c        |
| Sap30bp       |
| Csnk2a2       |
| Rims4         |
| Selenoh       |
| Atf6b         |
| Nptn          |
| E130308A19Rik |
| Slc1a4        |
| Armc1         |
| Pinx1         |
| Zfp143        |
| Hirip3        |
| Cmtr1         |
| Glrx          |
| H2afx         |
| Ndor1         |
| Gtf2f1        |
| Cars          |
| G3bp1         |
| Gpatch4       |
| Rbms1         |
| Entpd3        |
| Praf2         |
| Pelp1         |
| Zdhhc6        |
| Dyrk1a        |
| Ngfr          |
| Apip          |
| Slc6a7        |
| Enox2         |
| Mir705        |
| Arhgef3       |
| Pak4          |
| Plxna3        |
| Slc22a17      |
| Tctex1d2      |
| Chchd3        |

|               |
|---------------|
| Sel1l3        |
| Gnao1         |
| Klf15         |
| Zkscan4       |
| Tesk2         |
| Sertad4       |
| Ccz1          |
| H2afj         |
| D330050G23Rik |
| Sbsn          |
| Trabd         |
| Tonsl         |
| Thumpd1       |
| Satb1         |
| Siae          |
| Stx7          |
| E130317F20Rik |
| Snhg20        |
| Nckap5los     |
| R3hcc1        |
| Cox18         |
| Pias1         |
| Efnb1         |
| Sorbs1        |
| Ube2v1        |
| Bzw2          |
| Rpl31-ps20    |
| Adsl          |
| Rpl38-ps2     |
| Ap3b2         |
| Phactr2       |
| Ankzf1        |
| Hnrnpa1       |
| Taok3         |
| Psm4          |
| Actr6         |
| Bcl2l11       |
| Ppargc1a      |
| Actr8         |
| Mir5617       |
| Wdr55         |
| Zfp941        |
| Tbc1d22b      |
| Ppp1r2-ps3    |
| Sh3bgrl2      |
| Coro1c        |
| Borcs5        |

|           |
|-----------|
| Sssca1    |
| Ggps1     |
| Rbm3os    |
| Scg2      |
| Fbxo44    |
| Hist2h3b  |
| Sccpdh    |
| Tma7      |
| Rtl8a     |
| M6pr-ps   |
| Gab2      |
| Bag6      |
| Zfp618    |
| Lpin1     |
| Pin1      |
| Pcsk1     |
| Fmnl3     |
| Cd276     |
| Ywhaq-ps2 |
| Cenpa     |
| Ttc3      |
| Kazn      |
| Rab1a     |
| Dynlt1a   |
| Zfp334    |
| Dnajc6    |
| Ruvbl1    |
| Dnajb9    |
| Cep135    |
| Ccl27a    |
| Med16     |
| Rab21     |
| Katnal2   |
| Lcmt1     |
| Dgcr8     |
| Mrpl22    |
| Hist1h4h  |
| Scaf8     |
| Vstm2b    |
| Ccnh      |
| Zfp971    |
| Ift20     |
| Cck       |
| Slc48a1   |
| Prkag1    |
| Tmem43    |
| Alg3      |

|               |
|---------------|
| Rpl11         |
| Adgrl3        |
| Spout1        |
| Hspb6         |
| Tymp          |
| Sphk2         |
| Ctc1          |
| Rps12-ps18    |
| Zfp934        |
| Syt12         |
| Rpl21-ps8     |
| Cdk5r2        |
| Lamp1         |
| Steap2        |
| Hunk          |
| Nckipsd       |
| Thrb          |
| Ntm           |
| Pde12         |
| Dnaja1        |
| Ccdc28a       |
| Ggnbp1        |
| Sgpp1         |
| Slc29a1       |
| Ifrd1         |
| D130043K22Rik |
| Prr14         |
| Fdps          |
| Plppr3        |
| Romo1         |
| Rpl17-ps10    |
| Ficd          |
| Polr2b        |
| Kat2b         |
| Yipf4         |
| Cers5         |
| Mfsd1         |
| Zfp763        |
| Uchl4         |
| Rpl19         |
| Ecel1         |
| Fopnl         |
| Rmnd5b        |
| Pcsk1n        |
| Cntnap3       |
| Fam120b       |
| Copa          |



|          |
|----------|
| Npdc1    |
| Shroom2  |
| Rps19bp1 |
| Gpr165   |
| Gphn     |
| Sra1     |
| Mrps22   |
| Spdya    |
| Tmed10   |
| Tmem19   |
| Zfp968   |
| Rif1     |
| Gpr137b  |
| Flvcr1   |
| Tbc1d24  |
| Nfx1     |
| Nav3     |
| Tmem8    |
| Xntrpc   |
| Mbnl1    |
| Adap2os  |
| Msmg     |
| Olfm3    |
| Faf2     |
| Abcd4    |
| Cabp1    |
| Tspoap1  |
| Kcns3    |
| Atp5j    |
| Ndufa1   |
| C1qtnf12 |
| AW554918 |
| Tmem158  |
| Rnd2     |
| Pigb     |
| Mrto4    |
| Rnf187   |
| Abhd17b  |
| Tsen15   |
| Ndufc1   |
| Setd3    |
| Kbtbd7   |
| Impdh2   |
| Immt     |
| Slc39a13 |
| Tmem104  |
| Mrpl57   |

|               |
|---------------|
| Slc38a7       |
| Tmem218       |
| Dis3          |
| Mblac1        |
| Emc4          |
| Egfr          |
| Urod          |
| Lypla1        |
| Stk40         |
| Hist1h2ak     |
| C1qa          |
| Atp5d         |
| Ier2          |
| Cct2          |
| Rpl13a        |
| Idh3g         |
| Dirc2         |
| Cox4i1        |
| Ppp1r2        |
| Glrb          |
| Chchd6        |
| Cds2          |
| Calb2         |
| Prpf38a       |
| Gtf2b         |
| Ythdc1        |
| Mrgbp         |
| Fam58b        |
| Exosc1        |
| E130218I03Rik |
| Rnf24         |
| Cnmd          |
| Orc3          |
| Rbm8a2        |
| Itpk1         |
| Lrrc8d        |
| Flrt1         |
| Donson        |
| Rab12         |
| Kxd1          |
| Paccin2       |
| Tma7-ps       |
| Hmbox1        |
| Pdzd9         |
| Clint1        |
| Rab9b-ps1     |
| Eif3c         |

|               |
|---------------|
| Paip1         |
| Clec16a       |
| Det1          |
| Mdp1          |
| Dcaf7         |
| Cbln2         |
| Nudt15        |
| Nr2c2ap       |
| Doc2a         |
| Srfbp1        |
| Pcdhb6        |
| Slc30a5       |
| Snx15         |
| Ywhae         |
| Aggf1         |
| Myc           |
| E130307A14Rik |
| Dpp6          |
| Gatad1        |
| Ctsf          |
| Fez2          |
| Mnt           |
| Pou3f3        |
| Mapk1ip1l     |
| Nnmt          |
| Zmat5         |
| Arc           |
| Scpep1        |
| Llph-ps1      |
| Trip4         |
| Med31         |
| 5-Mar         |
| Hddc2         |
| Mrrf          |
| Atmin         |
| Siglece       |
| Nudc          |
| Zfp128        |
| Bptf          |
| N4bp2l1       |
| Ndufaf2       |
| Mettl21a      |
| Mgat2         |
| Tmem132b      |
| Klh28         |
| Crybb1        |
| B3galt4       |

|               |
|---------------|
| Serpini1      |
| Gbp1          |
| Cstf2t        |
| Tpm3          |
| Eif2s1        |
| Nrg1          |
| Tmem229b      |
| Mpped1        |
| Srp14         |
| Wasl          |
| Cant1         |
| Mustn1        |
| Adprm         |
| Pcgf2         |
| Uba2          |
| Trp53         |
| Ctnna2        |
| Rimklb        |
| Bloc1s6       |
| Hmgb1-ps3     |
| Pisd          |
| Arvcf         |
| Angptl6       |
| B230219D22Rik |
| Pik3r5        |
| Cables1       |
| Hnrnph1       |
| Olfr1344      |
| Tada1         |
| Tpst1         |
| Cdr2l         |
| Kif3c         |
| Ccdc181       |
| Parp8         |
| Taf1          |
| Rasd1         |
| Srp54a        |
| Zic1          |
| Psmc4         |
| Vapb          |
| Rpl27a-ps1    |
| Gpr25         |
| Mrpl14        |
| Map2k5        |
| Glb1          |
| Cdh6          |
| Sec24b        |

|            |
|------------|
| Fos        |
| Mkrn2      |
| Cdc42ep5   |
| Smim14     |
| Med26      |
| Ift22      |
| Fam92a     |
| Nrxn3      |
| Zfp385b    |
| Atic       |
| Ppid       |
| Megf8      |
| Scx        |
| Fhl3       |
| Tasp1      |
| Tbl3       |
| Gpatch11   |
| Atp1b1     |
| Sh3bgrl    |
| Ybx1       |
| Arhgap24   |
| Nkx2-1     |
| Matk       |
| Vps18      |
| Vps11      |
| St8sia3    |
| Eif4g2     |
| Vcp        |
| Dnajc27    |
| Kdm2b      |
| Anxa7      |
| Cd59b      |
| Ufm1       |
| Kctd7      |
| Dlx2       |
| Irf3       |
| Ahdc1      |
| Sema4d     |
| Oard1      |
| Stam2      |
| Mob3b      |
| Ccdc117    |
| Atxn1      |
| Fasn       |
| Alyref2    |
| Rps12-ps17 |
| Arhgdig    |

|            |
|------------|
| As3mt      |
| Top1mt     |
| Brk1       |
| Dusp1      |
| Smdt1      |
| Scamp2     |
| Trim41     |
| Ogfod1     |
| Mgst3      |
| Bloc1s2    |
| Grm8       |
| Fam166b    |
| Tmed4      |
| Pgs1       |
| Snord49b   |
| Edem3      |
| Ergic2     |
| Ccser2     |
| Uchl3      |
| Rps8-ps2   |
| Zfp108     |
| Stmn3      |
| Nfkbie     |
| Ormdl3     |
| Mir7578    |
| Zfp956     |
| Unk        |
| Eif3j1     |
| Sh2d5      |
| Pex12      |
| Scarb2     |
| Ubiad1     |
| St6galnac4 |
| Mtmr9      |
| Snx20      |
| Lonrf2     |
| Maf1       |
| Filip1     |
| Cd81       |
| Ctsa       |
| Dync1li2   |
| Zfp780b    |
| Mfsd14a    |
| Mir3076    |
| Zfp612     |
| Mettl16    |
| Lrrc8dos   |

|               |
|---------------|
| Crem          |
| Nudt5         |
| C130074G19Rik |
| Crhbp         |
| Pcbp4         |
| Ppp1r14c      |
| Chst15        |
| Xrcc6         |
| Tox2          |
| Rps19-ps7     |
| Slc25a38      |
| Myt1l         |
| Gdi1          |
| Cd8b1         |
| Nap1l2        |
| Tm9sf4        |
| Tsr2          |
| Atp2a2        |
| Crcp          |
| Ak6           |
| Dctn2         |
| Ifitm7        |
| Zcchc17       |
| Mknk2         |
| Rps14         |
| Ppp2r3d       |
| Pomp          |
| Pakap         |
| Sipa1         |
| Pop7          |
| Mfap1a        |
| Elp3          |
| Cnrip1        |
| Cacybp        |
| Nmbr          |
| Sptbn4        |
| Tpp1          |
| Uxt           |
| Rpp25l        |
| Phactr1       |
| Calcoco1      |
| Atg2a         |
| Pyroxd1       |
| Dpysl5        |
| Ppp1r16a      |
| Adra1a        |
| Atg4b         |

|            |
|------------|
| Hrh1       |
| Ankrd63    |
| Gprasp1    |
| Patz1      |
| Ilvbl      |
| C87436     |
| Ppdpf      |
| Spock3     |
| Layn       |
| Vps33a     |
| P2ry1      |
| Coq2       |
| Ppip5k1    |
| Ccl27b     |
| Naa60      |
| Amer2      |
| Aplp2      |
| Tnip2      |
| Coq8a      |
| Abt1       |
| Slc10a4    |
| Ythdf1     |
| Fbxo42     |
| Relch      |
| Zfp711     |
| Tcf25      |
| Nacad      |
| Myadml2    |
| Eml1       |
| Camk2d     |
| Rpl31-ps15 |
| Tmem258    |
| Aff2       |
| Rps12-ps10 |
| Tmppe      |
| Tarbp2     |
| Nectin2    |
| Ube2a      |
| Eid1       |
| Cebpz      |
| Nr2e1      |
| Farsb      |
| Mad2l2     |
| Dus1l      |
| Dnajc18    |
| Atf5       |
| Rpl13-ps1  |



|            |
|------------|
| Rwdd2b     |
| Pdk2       |
| Ddx56      |
| Tln1       |
| D10Wsu102e |
| Eef1e1     |
| Fam20c     |
| Ccdc85a    |
| AU041133   |
| Syn2       |
| Wbp11      |
| Zfp787     |
| Miga2      |
| Car8       |
| Gfer       |
| Clcc1      |
| Cdc5l      |
| Msantd1    |
| Rab26os    |
| Zbtb7a     |
| Dtymk      |
| Mir1902    |
| Erich1     |
| Ecsit      |
| Yars       |
| Usp21      |
| Oprd1      |
| Ppm1d      |
| Syt5       |
| Pfkb       |
| Oxct2b     |
| Camsap2    |
| Unc5d      |
| Rcan1      |
| Eci1       |
| Amotl1     |
| Gpaa1      |
| Heg1       |
| Mcoln1     |
| Eif3l      |
| Calm2      |
| Elfn1      |
| Scg3       |
| Cenpc1     |
| Tprkb      |
| Polrmt     |
| Lin37      |

|           |
|-----------|
| Rab30     |
| Phlpp2    |
| Yif1b     |
| Gngt2     |
| Med7      |
| Col23a1   |
| Prox1os   |
| Tmem131l  |
| Gamt      |
| Tmsb15b2  |
| Ascl1     |
| Mepce     |
| Cdk5rap3  |
| Rpl29-ps2 |
| Atp6v1f   |
| Bace1     |
| Ypel2     |
| Slc25a5   |
| Agbl5     |
| Actn1     |
| Rnf10     |
| Ift27     |
| Naf1      |
| Rnf5      |
| Tspyl5    |
| Ccdc84    |
| Prmt3     |
| Zcchc9    |
| Amot      |
| Cdk4      |
| Golga3    |
| Abat      |
| Dlgap2    |
| Rims1     |
| Tgfb1     |
| Tmem128   |
| Strn3     |
| Tmem165   |
| Slc25a10  |
| Palmd     |
| Sgce      |
| Slc2a12   |
| Rab28     |
| Zfp965    |
| G6pdx     |
| Tspan2os  |
| Ap4m1     |

|            |
|------------|
| Asphd1     |
| Eif4e3     |
| Mia        |
| Hmgcll1    |
| Chga       |
| Rbm11      |
| Atg16l2    |
| Tmem173    |
| Rpl10-ps1  |
| Abce1      |
| Lig4       |
| Spsb3      |
| Elob       |
| Chd4       |
| Trappc1    |
| Ggnbp2     |
| Tub        |
| Psmb7      |
| Slc35b2    |
| Hsd12      |
| Hsp90ab1   |
| Polr2j     |
| Galt       |
| Acer3      |
| Lipa       |
| Tmem44     |
| Rpl31-ps8  |
| Rps11-ps4  |
| Med18      |
| Ndc1       |
| Slc4a1ap   |
| Atp5l-ps2  |
| Hinfp      |
| Ttc5       |
| Dph3       |
| Kidins220  |
| Ephb6      |
| Mob2       |
| Cyb5d1     |
| Nyap2      |
| Rpl21-ps15 |
| Mydgf      |
| Surf2      |
| Mir6357    |
| Cenpo      |
| Micu2      |
| Naa35      |

|           |
|-----------|
| Rab6b     |
| Vps4a     |
| Gp5       |
| Nedd4     |
| Rps5      |
| Fkbp11    |
| Mrpl19    |
| Phf20     |
| Cbr3      |
| Rdx       |
| Zfp87     |
| Syng1     |
| Ntan1     |
| Zfyve27   |
| Rab27b    |
| Cxxc1     |
| Clns1a    |
| Blmh      |
| Atcayos   |
| Mettl8    |
| Kansl2-ps |
| Tbc1d19   |
| Zbtb46    |
| Sp9       |
| Zfp39     |
| Yipf2     |
| Sall3     |
| Cers1     |
| Pi4kb     |
| Utp3      |
| Mamdc4    |
| Mark1     |
| Qsox1     |
| Cdan1     |
| Mindy1    |
| Gtf2h2    |
| Dhx30     |
| Ddx39b    |
| Alk       |
| Cacul1    |
| Trbc2     |
| Efnb2     |
| Snrpf     |
| Zfand2a   |
| Cnih4     |
| Rpn2      |
| P2rx4     |

|            |
|------------|
| Rbck1      |
| Ddx27      |
| Sf3b5      |
| Frmd3      |
| Fcf1       |
| Kcnip1     |
| Zfand5     |
| Lats2      |
| Rpl21-ps7  |
| Tent4a     |
| Dapk3      |
| Hs6st1     |
| Pygo2      |
| Samd14     |
| Mir129-1   |
| Crebzf     |
| Ccnk       |
| Rnf113a2   |
| Ttyh3      |
| Uqcr10     |
| Cpt2       |
| Msi1       |
| Mrpl36     |
| Manf       |
| Slain2     |
| Srd5a3     |
| Lemd2      |
| Cmc1       |
| Vps35      |
| Rpl7a      |
| Kcnk13     |
| Bloc1s2-ps |
| Nupl1      |
| Fam122b    |
| Khdc4      |
| Plek       |
| Tmem178b   |
| Nedd9      |
| Otud7a     |
| Ankrd13d   |
| Cfl2       |
| Podxl2     |
| Zfp85os    |
| Phf13      |
| Tbc1d2b    |
| Hrh3       |
| Foxj1      |

|           |
|-----------|
| Lrrc3     |
| Sgsm1     |
| Ntf3      |
| Pip5k1c   |
| Smug1     |
| Derl3     |
| Timm23    |
| Uhmk1     |
| Eif2d     |
| Nop14     |
| Aifm3     |
| Clip4     |
| Pus1      |
| H3f3a-ps1 |
| Dars      |
| Hectd3    |
| Ubt1      |
| Ppox      |
| Trim17    |
| Mir6340   |
| Coq4      |
| Immp1l    |
| Zfp428    |
| Sfpq      |
| Mid1ip1   |
| Med11     |
| Bckdhb    |
| Serf1     |
| Mycbp     |
| Larp4b    |
| Myh9      |
| Rps2-ps13 |
| Setmar    |
| Gde1      |
| Gmnn      |
| Aacs      |
| Pkmyt1    |
| Mcfd2     |
| Cd72      |
| Pcdhb10   |
| Ppp6c     |
| Frmd4b    |
| Errfi1    |
| Rbm18     |
| Rpl18a    |
| Nr2f1     |
| Aamdc     |

|               |
|---------------|
| Mrpl16        |
| Stambpl1      |
| Nol9          |
| Proser1       |
| Cmtm8         |
| D130017N08Rik |
| Mir207        |
| Acyp1         |
| Ints4         |
| Rnf157        |
| Capn10        |
| Ankrd34c      |
| Mrpl27        |
| Cgref1        |
| Rpp30         |
| Ctr9          |
| Rps6ka1       |
| Stoml2        |
| Cpne8         |
| Mrpl3         |
| Apba1         |
| Mars          |
| B230118H07Rik |
| Grb2          |
| Dph2          |
| Zc3h18        |
| Epb41l4aos    |
| Chmp3         |
| Nxph2         |
| Smcr8         |
| Tsn           |
| Fnta          |
| Ahsa1         |
| Ubr5          |
| Tmem222       |
| Atp6v1h       |
| Rab39b        |
| Agtppb1       |
| Gtf3a         |
| Camk1g        |
| Srsf12        |
| Prdm12        |
| Mast1         |
| Gnrh1         |
| Usp22         |
| Amph          |
| Gstm6         |

|             |
|-------------|
| Adam9       |
| Cry2        |
| Aldh3a2     |
| Txn14b      |
| Atxn2       |
| Hspa9       |
| Nfu1        |
| Smarce1-ps1 |
| H1fx        |
| Adgrg1      |
| Smim4       |
| Gpr45       |
| Asb16       |
| Ccdc107     |
| Tm2d2       |
| Gins4       |
| Ipo4        |
| Ctu2        |
| Twink       |
| Abcf3       |
| Scn9a       |
| Rrp9        |
| Zfp597      |
| Atp6v1g1    |
| Bid         |
| Ppp6r1      |
| Sod1        |
| Zfp955b     |
| Mrps36-ps1  |
| Ppp1ca      |
| Rtl8c       |
| Tmem9b      |
| Zbtb11      |
| Gpr34       |
| Phc2        |
| Ttc28       |
| Nubpl       |
| Tmem242     |
| Zfr2        |
| Eefsec      |
| Ubxn11      |
| Fam184a     |
| Junb        |
| Mt3         |
| H2-K1       |
| Utp23       |
| Tenm3       |



|               |
|---------------|
| Furin         |
| Kti12         |
| Nop10         |
| Car10         |
| Cacnb2        |
| Unkl          |
| Lgals8        |
| Plxnc1        |
| Cdh22         |
| C030014I23Rik |
| Creg1         |
| Mrps16        |
| Bag3          |
| Mir101a       |
| Skp1a         |
| Pitpna        |
| Prrg3         |
| Dcdc2b        |
| Ell           |
| Echdc1        |
| Zfr           |
| Adipor2       |
| Chrna3        |
| Jakmip2       |
| Myl6b         |
| Fbl           |
| Zfp442        |
| Spata5        |
| Gldn          |
| Fto           |
| Mtfp1         |
| Alyref        |
| Ccdc130       |
| Kctd10        |
| Plaa          |
| Znhit3        |
| Mrpl43        |
| Hp1bp3        |
| Kcnb2         |
| Abhd10        |
| Nfil3         |
| Ogfr          |
| Eif2ak4       |
| Taz           |
| Cox6b1        |
| Acat2         |
| Zfp12         |

|           |
|-----------|
| Mtss1     |
| Kdm4a     |
| Egln3     |
| Prrc2c    |
| Zfp775    |
| Trim32    |
| Igf2r     |
| Wdr74     |
| Fam53c    |
| Mapk1ip1  |
| Cdkn2aip  |
| Tusc2     |
| Cd47      |
| Eef1akmt1 |
| Gzf1      |
| Bola2     |
| Tac1      |
| Leprot    |
| Ckap4     |
| Uba52-ps  |
| Pogk      |
| Itpa-ps1  |
| Foxred2   |
| Zscan26   |
| Ncbp2     |
| Fbxo38    |
| Ism1      |
| Nckap5l   |
| Phyhd1    |
| Tmem130   |
| Ccl19-ps3 |
| Cygb      |
| Grin2d    |
| Rex1bd    |
| Golph3l   |
| Nuak1     |
| Rad17     |
| Rhbd1l    |
| Smad1     |
| Gabrg1    |
| Ppm1g     |
| Rap1gds1  |
| Zfp324    |
| Snhg9     |
| Arid2     |
| Msh2      |
| Get4      |

|          |
|----------|
| Adnp     |
| Faxc     |
| Pycard   |
| Psemb2   |
| Dgka     |
| Sp2      |
| Maco1    |
| Bod1     |
| Fabp3    |
| Arhgef18 |
| Tmem59   |
| Mro      |
| Xkr8     |
| Pfn4     |
| Dhx38    |
| Fam102a  |
| Bcdin3d  |
| Rtn2     |
| Tmem132d |
| Dzip1l   |
| Cbx4     |
| Rbmx2-ps |
| Trbj2-7  |
| Klhl9    |
| Fam213b  |
| Zfp24    |
| Cryab    |
| Myl6     |
| Ptges2   |
| Syt11    |
| Hint1    |
| Cltc     |
| Cldn34c2 |
| Acot13   |
| Tpd52l2  |
| Rps8-ps4 |
| Senp8    |
| Irf2bp2  |
| Phkg2    |
| Sec22c   |
| Nudt7    |
| Srm      |
| Nsfl1c   |
| Ube2n    |
| Dact3    |
| Bud23    |
| Ubxn2a   |

|               |
|---------------|
| Acp2          |
| Spats2        |
| Lyrn4         |
| Kcnj11        |
| Sart3         |
| Hdac2         |
| Clgn          |
| Slc9a6        |
| Tmub2         |
| Pfdn1         |
| Hnrnph3       |
| Farp1         |
| Pitpnc1       |
| Gpatch1       |
| Cstf3         |
| Adk           |
| Tsen2         |
| Rsad1         |
| Pnp2          |
| Fv1           |
| Zup1          |
| Dhx57         |
| Penk          |
| Syndig1l      |
| Gpc3          |
| Ncln          |
| Adap2         |
| Aldh5a1       |
| Tcap          |
| Eno4          |
| D230025D16Rik |
| Bricd5        |
| Acadm         |
| Mrip-ps       |
| Ankrd61       |
| Fn3krp        |
| Zfp639        |
| Mdk           |
| Esrra         |
| Plekhm1       |
| Manea         |
| Cdk2ap2       |
| Bccip         |
| Nelfcd        |
| Rab3gap2      |
| Supt4a        |
| Srpk2         |

|           |
|-----------|
| Gatb      |
| Kctd9     |
| Zfp566    |
| Mir3572   |
| Lancl2    |
| Tomm20l   |
| Dnlz      |
| Tor2a     |
| Rnf41     |
| Tyrobp    |
| Wdr45     |
| Trappc5   |
| Arhgef15  |
| Dnpep     |
| Hmgb1-ps5 |
| Amfr      |
| Hypk      |
| Eps15l1   |
| Phrf1     |
| Eipr1     |
| Iffo1     |
| Odr4      |
| Prpsap2   |
| Stau1     |
| Rpl18-ps1 |
| Bop1      |
| Akt1      |
| Mir670hg  |
| Rps28     |
| Mterf3    |
| Ccdc85c   |
| Samd1     |
| Eme2      |
| Rdm1      |
| Tcf4      |
| Cpsf3     |
| Nrg3      |
| Arf1      |
| Nt5c2     |
| Aup1      |
| Mettl5    |
| Atp6v1d   |
| Pcbp2     |
| Dnajb12   |
| Chchd10   |
| Sos2      |
| Atpaf2    |

|           |
|-----------|
| Acadvl    |
| Tlr13     |
| Ric8b     |
| Ewsr1     |
| Arl1      |
| Uqcrc2    |
| Jrk       |
| Zfas1     |
| Gipc1     |
| Smurf1    |
| Ntmt1     |
| Dscr3     |
| Insig2    |
| Cnppd1    |
| Ydjc      |
| Exosc3    |
| Llph-ps2  |
| Amn1      |
| Cirbp     |
| Naxe      |
| Rad23a    |
| Rcl1      |
| Mtcl1     |
| Parp6     |
| Ssbp2     |
| Fhl1      |
| Cep170    |
| Tiam1     |
| Hars2     |
| Amd-ps3   |
| Mfsd13a   |
| Sacm1l    |
| Rps6kc1   |
| Oaz2-ps   |
| Pcnx4     |
| Lysmd1    |
| Marcks    |
| Rps2-ps10 |
| Rnasel    |
| Zfp2      |
| Cactin    |
| Pmpcb     |
| Zfp146    |
| Cyp20a1   |
| Cdh4      |
| Rasgrf2   |
| Ip6k2     |

|           |
|-----------|
| Atp1b3    |
| Zfp9      |
| Kctd1     |
| Mapk8ip3  |
| Dact1     |
| Psme1     |
| Zfp879    |
| Sash3     |
| Ubac2     |
| Crh       |
| Dnajc30   |
| Hnrnpm    |
| Gpn1      |
| Ndufa7    |
| Opa3      |
| Ubxn8     |
| Xab2      |
| Cog7      |
| Axin2     |
| Mrps24    |
| Triobp    |
| Wrnip1    |
| Actn2     |
| Cox19     |
| Tmem176a  |
| Gpr19     |
| Hist1h2ad |
| Dnajc14   |
| Safb      |
| Emc6      |
| Timm10b   |
| Pex10     |
| Mir3103   |
| Nol12     |
| Taf1d     |
| Tmem109   |
| Aurkaip1  |
| Rab5c     |
| Abcd2     |
| Rnf139    |
| Ccdc157   |
| Snapc5    |
| Ten1      |
| Rpl39-ps  |
| Tmem216   |
| Parg      |
| Rxb       |

|           |
|-----------|
| Pold2     |
| Mfsd11    |
| Zfp874b   |
| C1d       |
| Pvt1      |
| Tbrg1     |
| Rabep1    |
| Dcaf12l1  |
| Zfp687    |
| Mthfsl    |
| Atp5s     |
| Elp5      |
| Zfp984    |
| Tuba4a    |
| Usp32     |
| Eccc2     |
| Baiap2l2  |
| Rpl10-ps6 |
| Emc2      |
| Klhl12    |
| Nfe2l1    |
| Mid2      |
| Rpusd3    |
| Prkar1b   |
| Kpna6     |
| Riad1     |
| Fbxo16    |
| Mrpl58    |
| Mta3      |
| Sall1     |
| Daam1     |
| Npc2      |
| Pknox2    |
| Dtnb      |
| Zfp207    |
| Usp39     |
| Wdr77     |
| Gng8      |
| Fbxo11    |
| Idh3a     |
| Dnajb2    |
| Rnf227    |
| Pdzrn4    |
| Psip1     |
| Rgs3      |
| Laptm4b   |
| Fam57a    |



|               |
|---------------|
| Map2k2        |
| Proscos       |
| Rpl19-ps4     |
| Scaf4         |
| Ppp1r35       |
| Coq10a        |
| Dpm3          |
| Cct4          |
| Spata33       |
| Cwf19l1       |
| Atxn7l3b      |
| Fance         |
| Smg6          |
| Timmdc1       |
| Tmpo          |
| Ndufv1        |
| Rpl15-ps2     |
| C030017D09Rik |
| Cs            |
| Chrb2         |
| Orai1         |
| Pdzd7         |
| E130309D02Rik |
| Cenpx         |
| Snx17         |
| C1qc          |
| Acot7         |
| Cited1        |
| Zfp93         |
| Mtch1         |
| Zfp395        |
| Adcy6         |
| Fam217b       |
| Rac1          |
| Sun2          |
| Insig1        |
| Tmie          |
| Rbmx2         |
| Zc4h2         |
| Rpp25         |
| Limk2         |
| Kat5          |
| Atxn7l1       |
| Elovl5        |
| Aatk          |
| Zkscan5       |
| Mir8099-2     |

|          |
|----------|
| Pstpip2  |
| Tspan33  |
| S100a10  |
| Lrrc51   |
| Tmem120a |
| Tmem167b |
| Arl2     |
| Rasgrp3  |
| Brd3     |
| Pex5     |
| Shb      |
| Trmt112  |
| Hist1h4b |
| Lfn2     |
| Aff4     |
| Prr3     |
| Bivm     |
| Csf2ra   |
| Tpgs2    |
| Dhx16    |
| Hibadh   |
| Osbpl10  |
| Casc4    |
| Psmb4    |
| Ntn4     |
| Ddx54    |
| Rwdd3    |
| Trappc13 |
| Mfsd5    |
| Met      |
| Ubxn1    |
| Nsd3     |
| Cenpm    |
| Mttp     |
| Bloc1s4  |
| Tti1     |
| Magoh    |
| Spag7    |
| Cops2    |
| Dzip3    |
| Trpm2    |
| Hyls1    |
| Mgrn1    |
| Psmc1    |
| Fbxo33   |
| Dlg4     |
| Mrpl55   |

|            |
|------------|
| Hist2h3c1  |
| Fam155a    |
| Vps37d     |
| Mir1191    |
| Spats2l    |
| Thg1l      |
| Thrap3     |
| Taf3       |
| Gpr180     |
| Fam43a     |
| Smim10l1   |
| Zwint      |
| Hvcn1      |
| Glmn       |
| Galnt10    |
| Ift52      |
| Ctif       |
| Ccdc25     |
| C1galt1c1  |
| Dnajc2     |
| Hist1h2ba  |
| Hdac1      |
| Dynlrb1    |
| Erich3     |
| Ercc8      |
| Ercc1      |
| Pde4b      |
| Sap18      |
| Cul3       |
| Dhx15      |
| Thoc5      |
| B3gat1     |
| Tmem41a    |
| Ate1       |
| Ndnf       |
| Tmem74b    |
| Inpp5e     |
| F11r       |
| Lsamp      |
| Rpl31-ps13 |
| Glg1       |
| Tgfbr1     |
| Cr1l       |
| Snx6       |
| Gdap1      |
| Crebl2     |
| Rcn1       |

|            |
|------------|
| Ddrgk1     |
| Hikeshi    |
| Arhgap4    |
| Apoh       |
| Pik3r3     |
| Emg1       |
| Cadm3      |
| Hap1       |
| Hif1a      |
| Rps21      |
| Unc5b      |
| Arl16      |
| Metap1d    |
| Plpp2      |
| Dexi       |
| Rps12-ps5  |
| Gjd2       |
| Ndufb2     |
| Txn1       |
| Crlf2      |
| Maml1      |
| Rpl7a-ps11 |
| Arhgap22   |
| Rnu7       |
| Uqcc2      |
| Nans       |
| Becn1      |
| Map7d2     |
| Grip1      |
| Et14       |
| Zeb2os     |
| Sox6       |
| Yme1l1     |
| Eno1b      |
| Rfc3       |
| Sptssa     |
| Tmem267    |
| Cbx3-ps4   |
| Stmn1      |
| Farsa      |
| Irs1       |
| Tlr7       |
| Mtmr7      |
| Mbtps2     |
| Esd-ps     |
| Zfp664     |
| Ctdp1      |

|          |
|----------|
| Dusp3    |
| Zfp963   |
| Luc7l    |
| Mir7658  |
| Zfyve1   |
| Dlx1as   |
| Dennd5a  |
| Gtf2e1   |
| Krba1    |
| Cox6a2   |
| Fgf13    |
| Ubap1    |
| Ccdc149  |
| Ngb      |
| Ublcp1   |
| Fam162a  |
| Kcnq4    |
| Msl1     |
| Eny2     |
| Fam181b  |
| Nr2f6    |
| Pnmal1   |
| Uchl1    |
| Fgfr1op  |
| Gas8     |
| Cib1     |
| Gpr85    |
| Sdha     |
| Casp3    |
| Ppp1r14a |
| Ppp3cc   |
| Usp50    |
| Rrn3     |
| Ube2h    |
| Keap1    |
| Lhx6     |
| Fahd2a   |
| Cycs     |
| Pde9a    |
| Ddit4    |
| Hspe1    |
| Use1     |
| Cdk8     |
| Gucy1b1  |
| Dut      |
| Asb13    |
| Capn7    |

|           |
|-----------|
| Pibf1     |
| Hmgb1-ps6 |
| Slc7a1    |
| Atg4d     |
| Dpysl3    |
| Sparc     |
| Mogs      |
| Zswim7    |
| Atg14     |
| Mrpl34    |
| Trmu      |
| Dusp28    |
| Nudt17    |
| Nxpe4     |
| Evl       |
| Cdc42bpa  |
| Pdxk      |
| Samd12    |
| Fam149b   |
| Rps19-ps1 |
| Ankrd39   |
| Zfp954    |
| Ppm1m     |
| Dnm1l     |
| Ncaph2    |
| Tyro3     |
| Zfp940    |
| Igf1      |
| Pdcd11    |
| Ccdc50    |
| Trpc5     |
| Med9os    |
| Myh10     |
| Cysrt1    |
| Clk3      |
| Gabrg3    |
| Psd2      |
| Mapkap1   |
| Rnf216    |
| Cdh18     |
| Acly      |
| Rpl30-ps1 |
| Zfp747    |
| Bnip3l-ps |
| Rufy2     |
| Srd5a1    |
| Meig1     |

|            |
|------------|
| Gtf2h5     |
| Lpgat1     |
| Pcnp       |
| Mllt11     |
| Gpr107     |
| Gal3st4    |
| Tomt       |
| Taf4b      |
| Selenot    |
| Tmem185b   |
| Snx8       |
| Osbpl8     |
| Gnb2       |
| Rras       |
| Slc7a8     |
| Cfap97     |
| Fam131b    |
| Tdrp       |
| Mir670     |
| Prkra      |
| Smim1      |
| Pip4p1     |
| Mrpl10     |
| Opr1       |
| Cisd3      |
| Map1s      |
| Ciart      |
| Rrnad1     |
| Map3k10    |
| Alad       |
| Mxi1       |
| Rpl35a-ps5 |
| Taf15      |
| Zfp68      |
| Tmem80     |
| Wdr82      |
| Gpank1     |
| Naa50      |
| Sema5b     |
| Dand5      |
| Sdk2       |
| Etf1       |
| Armc5      |
| Zfp973     |
| Sdhc       |
| Rpl17-ps4  |
| Foxj3      |

|               |
|---------------|
| Hmga1         |
| Epha10        |
| Mir3098       |
| Ppp2r1b       |
| Trappc11      |
| Cldnd1        |
| Dhrs1         |
| Zdhhc2        |
| Enkur         |
| Pofut2        |
| Hist1h4c      |
| Ttll1         |
| Hras          |
| Ctxn2         |
| Rps27rt       |
| Cxc5          |
| Nup43         |
| Cmtm6         |
| Plpbp         |
| Clta          |
| Hspb11        |
| Adck1         |
| Mrps36-ps2    |
| Nit2          |
| Eif1ax        |
| Kif17         |
| Cuedc2        |
| Cnot3         |
| Map3k1        |
| Hsbp1         |
| Fcho1         |
| Lst1          |
| Kansl2        |
| Rabepk        |
| Cab39         |
| C330021F23Rik |
| Pbx3          |
| Man2b2        |
| D430036J16Rik |
| Ccl17         |
| Tmem243       |
| Cic           |
| Myh7          |
| Dpy30         |
| Ssr2          |
| Hist3h2bb-ps  |
| Bcor1         |



|            |
|------------|
| Mark3      |
| Vdac3      |
| Ppm1b      |
| Brsk2      |
| Ddx3y      |
| Ube2j2     |
| Tex261     |
| Faap20     |
| Ccpg1os    |
| Cramp1l    |
| Pop4       |
| Rps12-ps14 |
| Polr2g     |
| Jdp2       |
| Slc16a11   |
| Tex10      |
| Trpc3      |
| Zfp287     |
| Irf2bpl    |
| Ankrd13b   |
| Ddost      |
| Zfp938     |
| Atad1      |
| Mtx2       |
| Chd5       |
| Snhg15     |
| Grm5       |
| Wac        |
| Kbtbd2     |
| Sik1       |
| Med15      |
| Adcyap1r1  |
| Hnrnpc     |
| Rpl21      |
| Tatdn2     |
| Tubb5      |
| Fam114a2   |
| Ralb       |
| Gpr139     |
| Cd14       |
| Pdxdc1     |
| Rpl38-ps1  |
| Nsmce2     |
| Rpl15      |
| Slc35d3    |
| Slc25a12   |
| Lamp5      |

|            |
|------------|
| Astn2      |
| Denr       |
| Zfp408     |
| Wtap       |
| Gstz1      |
| Spopl      |
| Suv39h1    |
| Rarres1    |
| Rpl23a-ps1 |
| Frmd5      |
| Ranbp6     |
| Snrnp35    |
| Smap2      |
| Cuta       |
| Slc17a8    |
| Wdr5b      |
| Tle3       |
| Hmgxb4     |
| Pigu       |
| Ppp1r18    |
| Sgf29      |
| Dcun1d1    |
| Fxr2       |
| Efhd2      |
| Lamtor2    |
| Nrip2      |
| Tmem87b    |
| Wwp2       |
| Mkl1       |
| Rbm6       |
| Gigyf1     |
| Hexim2     |
| Itpkc      |
| Rragc      |
| Alkbh4     |
| Gga1       |
| Gdap1l1    |
| Rpl28      |
| Ppil1      |
| Ccdc174    |
| Clvs1      |
| Rap1b      |
| Zfp37      |
| Elmsan1    |
| Setd5      |
| Parm1      |
| Jpt2       |

|               |
|---------------|
| Nsg2          |
| Ubash3b       |
| Hist1h2bf     |
| Ube2z         |
| Psmc8         |
| D830025C05Rik |
| Cnep1r1       |
| Gtf3c6        |
| Rara          |
| Tbrg4         |
| Serf2         |
| Gtf2h4        |
| Fra10ac1      |
| Tagap1        |
| Lrrc23        |
| Nipal2        |
| Ctp           |
| Mob4          |
| Sym           |
| Lmbrd1        |
| Abcf1         |
| Txndc17       |
| Mpdu1         |
| Srp9          |
| Mir1957b      |
| Soga1         |
| Stard3nl      |
| Apold1        |
| Ola1          |
| Oaz2          |
| Atg12         |
| Pacrg         |
| Zmym4         |
| Specc1l       |
| Yju2          |
| Zfp30         |
| Eml4          |
| Stx12         |
| 7-Sep         |
| Id3           |
| Hdac4         |
| Trnp1         |
| Ttc9          |
| Rnf111        |
| Exoc2         |
| Trex1         |
| BC055324      |

|           |
|-----------|
| Med24     |
| Chpf      |
| Tmem198   |
| Ndufa10   |
| Got2      |
| Rab11fip5 |
| Hipk1     |
| Lym2      |
| Ndufab1   |
| Cstad     |
| Pfdn6     |
| Htr2a     |
| B4galt2   |
| Prmt4     |
| Pik3ip1   |
| Mir5122   |
| Timm10    |
| Sirt6     |
| Ankrd46   |
| Hcn4      |
| Cln6      |
| Txn14a    |
| Polr3a    |
| Foxo3     |
| Plod3     |
| Bbs5      |
| Rundc1    |
| Isy1      |
| Il17d     |
| Dhx40     |
| Lmn       |
| Pold4     |
| Ankrd24   |
| Tnfrsf12  |
| Hapln1    |
| Efcab2    |
| Tmem237   |
| Cox5b     |
| Uap111    |
| Rpl3      |
| Pvalb     |
| Rbm27     |
| B3gnt9    |
| Nme6      |
| Supt20    |
| Chac2     |
| Ubp1      |

|            |
|------------|
| Tvp23a     |
| N4bp3      |
| Zxda       |
| Tmem29     |
| Tcte1      |
| Dtd2       |
| Fis1       |
| Fbxo18     |
| Lor        |
| Arf6       |
| Mau2       |
| Fxyd1      |
| Drg2       |
| Zfp946     |
| Poglut1    |
| Ptprf      |
| Mif        |
| Rpl27-ps2  |
| Usmg5      |
| Ifit2      |
| Ebag9      |
| 8-Mar      |
| Cebpa      |
| Stk39      |
| Vsig10l    |
| Gramd1b    |
| Timm17b    |
| Ccdc137    |
| Fem1b      |
| Arhgap36   |
| Tm6sf1     |
| Kctd13     |
| Uba52      |
| Stamp      |
| Fastkd3    |
| Ccdc86     |
| Ndufa3     |
| Yy2        |
| Bcs1l      |
| Ccdc92     |
| Grn        |
| Ap1s2      |
| Cstf1      |
| Inpp1      |
| Commd9     |
| Tlk2       |
| Anp32b-ps1 |

|           |
|-----------|
| Mcf2      |
| Safb2     |
| Stk32b    |
| lqcg      |
| Atp6v1b2  |
| Nxf1      |
| BC048403  |
| Ost4      |
| Chtf18    |
| Asah2     |
| Kantr     |
| Pygm      |
| D17H6S53E |
| Zranb2    |
| P3h4      |
| Phb2      |
| Kcnj9     |
| Mgst1     |
| Aes       |
| Mcrs1     |
| Tcaim     |
| Psma5     |
| lpo9      |
| Nob1      |
| Zfp354a   |
| lars2     |
| Bsdc1     |
| Cyth3     |
| Lipo3     |
| lspd      |
| Pcdhb2    |
| Pcyt1a    |
| Gpx3      |
| Slc50a1   |
| Mrps15    |
| Letm1     |
| Ern1      |
| Echs1     |
| Sf3b3     |
| Slc27a4   |
| Pusl1     |
| Ube2d3    |
| Ccdc175   |
| Fgf10     |
| Tox4      |
| Nr1d2     |
| Gnptg     |

|             |
|-------------|
| Nelfe       |
| Rps23-ps2   |
| Pmf1        |
| Mcts1       |
| Rnf215      |
| Hk1         |
| Apba3       |
| Cd68        |
| Nap1l3      |
| Vwa5b2      |
| Klhl7       |
| Lrrn3       |
| Mir7676-1   |
| Ppp1r3f     |
| Hsf1        |
| Srrt        |
| D3Erttd254e |
| Usp14       |
| Rpl35       |
| Cdh13       |
| Usp1        |
| Tbc1d10a    |
| Slc35e1     |
| Lactb       |
| Dcaf5       |
| Fam219b     |
| Enah        |
| Fbxl17      |
| Carf        |
| Mrpl46      |
| Wnt5a       |
| Sdc2        |
| Slbp        |
| Lpcat2      |
| Aars        |
| Ndufs6b     |
| Dnajc16     |
| Mrpl45      |
| Spire1      |
| Ccdc184     |
| Pik3cd      |
| Arrdc1      |
| Cdyl2       |
| Mib2        |
| Bag5        |
| Barx2       |
| BC002059    |

changed in CCK

510

|               |
|---------------|
| Ap3s1         |
| Ccdc61        |
| Rrp8          |
| Nrf1          |
| Slc25a40      |
| Zbtb24        |
| Cbr1          |
| Rps6ka5       |
| Zcchc14       |
| Hdgfl2        |
| Dcp2          |
| Dhx36         |
| Cotl1         |
| Ctsb          |
| Srsf10        |
| Ptges3-ps     |
| Cd37          |
| Mrps5         |
| Leprotl1      |
| Sec23ip       |
| Gosr1         |
| Rfxank        |
| Psmg3         |
| Zfp536        |
| Syt2          |
| Slc25a15      |
| Cdk6          |
| Plp1          |
| Gm26377       |
| Ptprz1        |
| Cdr1          |
| B3galnt2      |
| Serpina3n     |
| Gm15793       |
| Gm49405       |
| Gm12715       |
| Gm1821        |
| Ovol2         |
| Rad54l2       |
| Gm15464       |
| Lrrc10b       |
| Gm6180        |
| Urb1          |
| Cacna1h       |
| Chst8         |
| R3hdm4        |
| 5830462I19Rik |



|               |
|---------------|
| Fyb2          |
| Fgf5          |
| A330023F24Rik |
| Gm12918       |
| Erbin         |
| Shisa6        |
| Gm12394       |
| Crim1         |
| Gm26702       |
| Hic2          |
| Stk35         |
| Gm5510        |
| Gm6563        |
| Camk2a        |
| Dennd6a       |
| Ccl21a        |
| Capn1         |
| Rnf169        |
| Fth1          |
| Prex1         |
| Gm15564       |
| Gm21958       |
| Dcbld1        |
| Crocc         |
| Prelp         |
| Teddm2        |
| Gm12416       |
| Ston2         |
| Zcchc7        |
| Fam69a        |
| Gm10355       |
| Resf1         |
| Gm26811       |
| A330074K22Rik |
| Lrp1          |
| mt-Rnr1       |
| Baiap2        |
| Galnt9        |
| Adgra2        |
| Map9          |
| Adcy9         |
| Psd           |
| Sgms2         |
| Gm25911       |
| Sstr4         |
| Gm13694       |
| Gm14138       |

|               |
|---------------|
| Ror1          |
| Gm21093       |
| Gm10222       |
| Zfp384        |
| Gm20900       |
| Ylpm1         |
| Med17         |
| Cyp4v3        |
| Gm26384       |
| Cpne9         |
| Gm7353        |
| Muc3a         |
| Gm21988       |
| Ctnna1        |
| Zfp26         |
| Zc3hav1l      |
| Plppr2        |
| Nfic          |
| Gm13623       |
| Gm5859        |
| Gm12350       |
| Gm8624        |
| Serpina3f     |
| Daam2         |
| Zfp106        |
| Nvl           |
| Dgkz          |
| Gm26767       |
| Plxna4        |
| Gm26596       |
| Gm12892       |
| Gm24270       |
| Zgpat         |
| Slc7a4        |
| Prkd1         |
| Gm6395        |
| Efr3a         |
| Gm11759       |
| Ido1          |
| Slitrk5       |
| Tmc7          |
| 1600029O15Rik |
| Gm20498       |
| Nwd1          |
| Klh135        |
| Ddn           |
| Mast3         |

|               |
|---------------|
| Gm7336        |
| Pagr1a        |
| Ywhah         |
| Acp5          |
| Gm2163        |
| A330070K13Rik |
| Adgrb2        |
| Gm20671       |
| Zfp932        |
| Gss           |
| Gm11605       |
| Ltb           |
| Gm13292       |
| Gm11263       |
| Gm17786       |
| 1500002C15Rik |
| Cpne7         |
| mt-Nd1        |
| 5730522E02Rik |
| Gm6682        |
| Tbl2          |
| Cc2d2a        |
| Gm14329       |
| Tbcel         |
| Gm867         |
| Nfix          |
| Gm7984        |
| Rpl5          |
| Prlr          |
| Ubr4          |
| Gm13303       |
| Gm21985       |
| Vit           |
| Gm16581       |
| Acap3         |
| Cebpb         |
| Serpina3e-ps  |
| Ugt8a         |
| Auts2         |
| 2310002F09Rik |
| Tnfrsf13c     |
| Gm26995       |
| Nsmf          |
| Fat3          |
| Megf11        |
| Mobp          |
| Usp54         |

|               |
|---------------|
| Setd4         |
| Zfp992        |
| Rcor3         |
| Gm6472        |
| Dstyk         |
| Mapk14        |
| Gm10132       |
| Slc22a15      |
| Lime1         |
| Gm6498        |
| Gm10359       |
| Gm10069       |
| Gm14044       |
| Cspg4         |
| Adam11        |
| F5            |
| Zfp953        |
| Ccdc74a       |
| Gm13767       |
| Cul2          |
| Epb41         |
| Mzf1          |
| Hrnr          |
| Gm21987       |
| Gm20417       |
| Gm960         |
| Dph6          |
| Sco1          |
| Wdr35         |
| Gm24187       |
| Pdpr          |
| Gm12070       |
| Gm12841       |
| Klf10         |
| Gm3892        |
| Csmd2         |
| Tjp2          |
| Gm26602       |
| Erf           |
| Rspo1         |
| Hpcal4        |
| Gm10335       |
| 2810455O05Rik |
| Snrnp48       |
| Rad51ap2      |
| Col4a3bp      |
| Nptxr         |

|               |
|---------------|
| Gm4995        |
| Esyt3         |
| Ap1s3         |
| Spidr         |
| Gm2606        |
| Ddx46         |
| 9-Sep         |
| Gm13696       |
| Gm13691       |
| Gm10250       |
| Ttn           |
| Gm13301       |
| Gm13215       |
| Cep41         |
| Gm23935       |
| Ctxn3         |
| Gm20659       |
| Gm26794       |
| Gm6222        |
| mt-Cytb       |
| Natd1         |
| Gm10600       |
| Stard7        |
| Gm5577        |
| Cdc42ep4      |
| Smc5          |
| 4930419G24Rik |
| Fam234b       |
| Vcam1         |
| Wscd2         |
| mt-Tl1        |
| A230065N10Rik |
| Pnpla1        |
| Gm16229       |
| Gm17167       |
| Ccdc42        |
| Ppp1r16b      |
| Gm26805       |
| Agtr1a        |
| D630045J12Rik |
| Gm9396        |
| Gm26917       |
| Sfswap        |
| 2510002D24Rik |
| Pcdh1         |
| 3-Sep         |
| Gm15879       |

|               |
|---------------|
| Ctdspl        |
| Gm8172        |
| Ppig          |
| Setbp1        |
| Gm10593       |
| Fgd6          |
| Plxna1        |
| Gm16409       |
| Znrf3         |
| Sipa1l3       |
| Gprin3        |
| Syt17         |
| 2810002D19Rik |
| Gm11149       |
| Gm4924        |
| Efna2         |
| Pygb          |
| Gm26770       |
| C030047K22Rik |
| Aldh1l2       |
| Tmem121b      |
| Tuft1         |
| Gm20499       |
| mt-Rnr2       |
| Parp4         |
| Prrt2         |
| Scara3        |
| Gm13698       |
| Pi4k2b        |
| Cybrd1        |
| Gm7206        |
| Gm16278       |
| mt-Nd4l       |
| Rtn4rl1       |
| Nox1          |
| mt-Atp6       |
| Gm42418       |
| Chrna7        |
| Umad1         |
| Gm9905        |
| Angel1        |
| Mlh3          |
| Prkcg         |
| Gm13750       |
| Arntl         |
| Gm8213        |
| Gm11966       |

|               |
|---------------|
| Rad21l        |
| 4731419I09Rik |
| Olfr31        |
| Ccl21b        |
| Cavin2        |
| Cerkl         |
| Gm21981       |
| Stard4        |
| Gm13296       |
| Gm13304       |
| Arid4b        |
| Ccl28         |
| Gm3362        |
| Gm20441       |
| Camk2b        |
| Islr2         |
| Med13l        |
| Gm21541       |
| Npcd          |
| Krt20         |
| Gm20518       |
| Gm13340       |
| Gm6061        |
| Gm26520       |
| Gk            |
| Tpmt          |
| Rtnn          |
| Rsrp1         |
| Rpl9-ps4      |
| Slit3         |
| Hltf          |
| Ung           |
| Syt7          |
| Me1           |
| Plec          |
| Zbtb1         |
| Gm3883        |
| Gm14494       |
| Gm15772       |
| Insm1         |
| Gm17036       |
| Zc3h7b        |
| Gm7536        |
| Rfc1          |
| Cntln         |
| Ankrd28       |
| Igfbp7        |

|               |
|---------------|
| Igsf9b        |
| Slc44a5       |
| Btaf1         |
| Gstcd         |
| Gm13610       |
| Arf3          |
| Nup98         |
| Neat1         |
| Slc17a7       |
| Slit1         |
| Hadha         |
| Dyrk2         |
| Ii17rd        |
| Gpr171        |
| Gm8430        |
| Gm21984       |
| Hebp1         |
| Gm2962        |
| Plekhg5       |
| Ppp1r1b       |
| Ptk7          |
| Zfp532        |
| Gm13695       |
| 3110070M22Rik |
| Gm38393       |
| Unc5a         |
| 1190007I07Rik |
| Ptbp1         |
| Tspan18       |
| mt-Nd4        |
| Bmpr1a        |
| Zfp873        |
| Nsun7         |
| Gm16740       |
| Scd2          |
| Atp1a1        |
| Topbp1        |
| Ganc          |
| Gm14760       |
| Itga6         |
| Hmgcs1        |
| Cmya5         |
| Atp2b3        |
| Zfp592        |
| Gm17202       |
| Lrrn2         |
| Gm6851        |



|               |
|---------------|
| Gm26560       |
| 2310058D17Rik |
| Hrk           |
| Gm12671       |
| Gm49322       |
| Cfap58        |
| Glipr1        |
| Gm13768       |
| Cwc22         |
| Kdm4b         |
| Ncan          |
| Ccdc96        |
| Gid4          |
| Fut9          |
| Tet3          |
| Snap23        |
| Gm20605       |
| Gm20503       |
| Tmcc2         |
| Bche          |
| Gm14703       |
| mt-Co1        |
| Dagla         |
| Gm21986       |
| Ldlrad3       |
| Ptpn21        |
| Slco2a1       |
| Dhx33         |
| Gm5453        |
| Gm17494       |
| Yipf6         |
| Gm11425       |
| Btbd17        |
| Gm10123       |
| Rpl9-ps6      |
| A530032D15Rik |
| 4632411P08Rik |
| Kitl          |
| Dtnbp1        |
| Jarid2        |
| A330102I10Rik |
| Mccc2         |
| Amy1          |
| Hmox1         |
| Arhgap39      |
| Gm13697       |
| Dync1h1       |

|               |
|---------------|
| Trmt11        |
| Rilpl1        |
| Gm13693       |
| Gm15710       |
| Slc19a1       |
| Gm26733       |
| Slc16a2       |
| Smo           |
| Klhl23        |
| Gm26821       |
| Rpl4          |
| Gm12537       |
| Rftn2         |
| Xlr3b         |
| Dsc3          |
| Csf1          |
| Fam189a1      |
| Gm17168       |
| 9130019P16Rik |
| Atf7          |
| Tstd2         |
| Galnt17       |
| Pabpc5        |
| Gm11196       |
| Ppp1r13l      |
| Eif3e         |
| Aim2          |
| Gm11185       |
| mt-Nd5        |
| Tagln         |
| Gm10704       |
| Cobll1        |
| Gm10284       |
| Gm20683       |
| Gm16061       |
| Zw10          |
| Rgs11         |
| Cpne6         |
| A230005M16Rik |
| Urah          |
| Gm15920       |
| Mdga1         |
| Sox12         |
| Gm10275       |
| Dpep1         |
| Kcnh3         |
| Rtn4r         |

|               |
|---------------|
| Gm15832       |
| Pcdh19        |
| Zfhx2         |
| Gm14278       |
| Gm14164       |
| 9230009I02Rik |
| Gpc1          |
| Lxn           |
| Gm13302       |
| Gm6863        |
| Twsg1         |
| Cbl           |
| 1110002L01Rik |
| Abhd5         |
| Dnmt3a        |
| Fyco1         |
| Nlr1          |
