# Supplementary material for: Identification of Neurensin-2 as a novel modulator of emotional behavior
Source: PubMed Central journal article supplement (PMC8505262; doi:10.1038/s41380-021-01058-5), 2021-03-19
Supplement: 41380_2021_1058_MOESM5_ESM.pdf [file 41380_2021_1058_MOESM5_ESM.pdf]

**Table S3****Genes related to the post synaptic membrane**

| <b>Gene ID</b> | <b>pval</b> | <b>RPKM in CCK</b> | <b>cluster</b>                |
|----------------|-------------|--------------------|-------------------------------|
| <b>GRIA1</b>   | 0.048       | 80                 | <b>AMPA</b>                   |
| <b>CNIH2</b>   | 0.021       | 75                 |                               |
| <b>NEURL1A</b> | 0.001       | 13                 |                               |
| <b>MINK1</b>   | 0.037       | 7                  |                               |
| <b>CACNG8</b>  | 0.029       | 5                  |                               |
| <b>SHANK1</b>  | 0.003       | 80                 | <b>PSD</b>                    |
| <b>SHANK3</b>  | 0.002       | 7                  |                               |
| <b>NLGN3</b>   | 0.019       | 23                 |                               |
| <b>DLGAP3</b>  | 0.023       | 2                  |                               |
| <b>GRIN1</b>   | 0.001       | 15                 |                               |
| <b>GABRA3</b>  | 0.005       | 5                  | <b>GABA</b>                   |
| <b>Grm1</b>    | 0.006       | 5.5                | <b>Glutamate Metabotropic</b> |
| <b>Grik5</b>   | 0.001       | 10                 | <b>Kainate</b>                |
| <b>faim2</b>   | 0.019       | 54                 | <b>Non specific</b>           |
| <b>LRRTM1</b>  | 0.013       | 35                 |                               |
| <b>Shc4</b>    | 0.034       | 3                  |                               |
| <b>BCR</b>     | 0.024       | 15                 |                               |
| <b>SEMA4F</b>  | 0.001       | 13                 |                               |
| <b>KCNB1</b>   | 0.007       | 7.5                |                               |
