# Supplementary material for: Identification of Neurensin-2 as a novel modulator of emotional behavior
Source: PubMed Central journal article supplement (PMC8505262; doi:10.1038/s41380-021-01058-5), 2021-03-19
Supplement: 41380_2021_1058_MOESM6_ESM.pdf [file 41380_2021_1058_MOESM6_ESM.pdf]

## Table S4

### Protein-transport related genes

| Gene ID   | labeling of the protein transport pathway |
|-----------|-------------------------------------------|
| nxt1      | Endosome                                  |
| bbs4      | Golgi/TGN                                 |
| naca      | ER/ER-Golgi                               |
| vps52     | autophagy                                 |
| eif5a     | peroxisome                                |
| timm13    | nucleus-cytoplasm                         |
| arfgef2   | mitochondria- cytoplasm                   |
| pex7      | secretory                                 |
| copb2     | other                                     |
| ap1s1     |                                           |
| pom121    |                                           |
| tomm7     |                                           |
| tomm6     |                                           |
| seh1l     |                                           |
| atg7      |                                           |
| timm9     |                                           |
| sec22a    |                                           |
| rabgef1   |                                           |
| vps39     |                                           |
| ap5z1     |                                           |
| kdelr2    |                                           |
| gabarapl2 |                                           |
| ramp2     |                                           |
| nup88     |                                           |
| rrbp1     |                                           |
| dennd1a   |                                           |
| vti1b     |                                           |
| ap4s1     |                                           |
| gabarap   |                                           |
| micall1   |                                           |
| preb      |                                           |
| phax      |                                           |
| scfd1     |                                           |
| sec61b    |                                           |
| aktip     |                                           |
| ap2a1     |                                           |
| cog8      |                                           |
| tom1l2    |                                           |
| ist1      |                                           |
| rab5a     |                                           |
| rangrf    |                                           |

|         |
|---------|
| slc15a3 |
| vps25   |
| mon1a   |

..
