# Supplementary material for: Identification of Neurensin-2 as a novel modulator of emotional behavior
Source: PubMed Central journal article supplement (PMC8505262; doi:10.1038/s41380-021-01058-5), 2021-03-19
Supplement: 41380_2021_1058_MOESM7_ESM.pdf [file 41380_2021_1058_MOESM7_ESM.pdf]

**Table S5**

CRISPR validation: Results of OFF-Target verification by Sanger sequencing

| Gene ID         | location   | chromosomal location          | sequence                  | PAM | Result-Editing | F primer                          | R primer                            | length |
|-----------------|------------|-------------------------------|---------------------------|-----|----------------|-----------------------------------|-------------------------------------|--------|
| Nrsn2           | Exon 2     | chr2:152,369,584-152,374,334  | TGGAGGAAAAGTACATGGTAT GGG | GGG | Yes            | TGCCAGATGGTCTCAGAGA               | CTCTGCCAGAAGGCATCCAA                | 591    |
| Zdhhc5          | Exon 2     | chr2:84,710,597-84,710,619    | TGAAGGAAAGCACATGGGAG      | GGG | No             | GGGCATGTTGGAGCTCTGAT              | GCTGCTCTAGTGTGGTGT                  | 493    |
| Abca8a          | Exon 39    | chr11:110,025,789-110,025,811 | TGAAGGAAAATACATGGAAT      | TGG | No             | GCTGATGAAAATTTAGAGAAAAGCAATGATAAT | AAAAGCCACTGAGCTACTCTCTACAATT        | 689    |
| Rhbg            | Exon 5     | chr3:88,245,808-88,245,830    | TGGACGACTGGACATGGTAT      | GGG | No             | CGTTCTGGACGTGGACCTTA              | GGCTGCTTAGTAGTGACGGA                | 517    |
| Fat4            | Exon 7     | chr3:38,970,701-38,970,723    | TGAAGTTAAGTACATGTTAT      | TGG | No             | AGGCAGTTGAGCTCTTAGGTC             | CTTAGAAGAAGCAGACACGCT               | 541    |
| Wdfy3           | Exon 35    | chr5:101,889,296-101,889,318  | TGGAGGAAAGTACAGGTAT       | TGG | No             | CAAAGTTGGGTACACCTGAGAAT           | TCACAGGCTGGCTTAAAGTGA               | 539    |
| Ccdc80          | Exon 3     | chr3:45,095,317-45,095,339    | TGCAGGAAAGAACAGGGTAT      | GGG | No             | GCAGTAGGTCAGCTCGGTATC             | ACAGCACCATGCTAAACTTGC               | 579    |
| Theg1           | Exon 6     | chr5:77,056,055-77,056,077    | TGGAGGAAAGTAGCTGGGAT      | TGG | No             | CATCGGTGGGAAAAGAGC                | TGAACTCGCTCAGAGAACGG                | 534    |
| Ntm             | intron 1   | chr9:29,941,757-29,941,779    | GGGAGGAAAAGATGTGGTAT      | TGG | No             | ACAGCAGATTCGGTGATGA               | GGGTGGCGGTTAGGATAGTG                | 526    |
| Zpf644          | intron 1   | chr5:106,667,595-106,667,617  | TGGTGTAAGTACATGGAAG       | AGG | No             | TATGAGCCATCAGTTCTGCACC            | TAGCTGCTATCACAATTCACCTT             | 437    |
| Spidr           | intron 1   | chr3:88,245,808-88,245,830    | ATGATAAAAGTACATGGTAT      | TGG | No             | CCAGGATAGCCAAACAATCC              | AACTCAAGTGCCCCAGGTG                 | 194    |
| Gm5139-Gm18294  | intergenic | chr3:64190048-64190070        | TTTTAAAAAGTACATGGTAT      | TGG | No             | GGAATCGTGAATGGTATTGGTAAGC         | ATAGGTAGGGAGATAGTGGGTAGCCTTGTC      | 680    |
| Gm12010-Gm12011 | intergenic | chr11:16210581-16210603       | TGTTAAAAAGTACATGGTAT      | TGG | No             | AGTTCCTGTATCCACTTAGACTTGAGATTGTAC | AGAAAGAAATTTAAGAAGATCACAGAAGACAGAAA | 533    |
| Kcnq5-Gm26580   | intergenic | chr1:21959279-21959301        | TTGGGTAAAGTACATGGTAT      | GGG | No             | CTCCCTGCTCAGACCTCAA               | TTAAGCTCATCTCTGGGTTGAT              | 560    |
| Olf1353-Olf1352 | intergenic | chr10:78977749-78977771       | TGATAAAAAAGTACATGGTAT     | TGG | No             | ACCAAGCAATATGAAAATCTGTATGGCAA     | TGTTCTGTTCTGGAAATTTCCCTG            | 668    |
| Slc10a2-n-R5s94 | intergenic | chr8:5212502-5212524          | CCATGGAAAAGTACATGGTAT     | GGA | No             | TACTCAAGTAAAAGGGTAAAAGGA          | AGGCCAATGACAGGTGTGA                 | 431    |
| Gm7803-Gm14611  | intergenic | chrX:50332539-50332561        | AGGTAGAGAGTACATGGTAT      | AAG | No             | ACATCAAAACCAGCTCCATCCT            | TCTGACTTTGAAGAAAATGACCAAA           | 486    |
