# Supplementary material for: Identification of Neurensin-2 as a novel modulator of emotional behavior
Source: PubMed Central journal article supplement (PMC8505262; doi:10.1038/s41380-021-01058-5), 2021-03-19
Supplement: 41380_2021_1058_MOESM8_ESM.pdf [file 41380_2021_1058_MOESM8_ESM.pdf]

|            |                                                                                                                                       |       |    |   |    |         |         |         |         |         |         |
|------------|---------------------------------------------------------------------------------------------------------------------------------------|-------|----|---|----|---------|---------|---------|---------|---------|---------|
| Q923T9     | Calcium/calmodulin-dependent protein kinase type II subunit gamma OS=Mus musculus GN=Camk2g PE=1 SV=1 - [KCC2G_MOUSE]                 | 10.59 | 11 | 2 | 4  | 11      | 9.006E6 | 2.723E7 | 1.697E7 | 0.000E0 | 0.000E0 |
| A2A6T1     | Cerebellar degeneration-related protein 2-like OS=Mus musculus GN=Cdr2l PE=2 SV=1 - [CDR2L_MOUSE]                                     | 11.40 | 1  | 5 | 5  | 11      | 8.660E6 | 1.410E7 | 1.262E7 | 0.000E0 | 0.000E0 |
| G3UY38     | Heterogeneous nuclear ribonucleoprotein L OS=Mus musculus GN=HnrnpL PE=4 SV=1 - [G3UY38_MOUSE]                                        | 21.27 | 4  | 8 | 11 | 11      | 1.035E7 | 8.137E6 | 2.980E7 | 0.000E0 | 0.000E0 |
| G5EBQ4     | Cytohesin-3 OS=Mus musculus GN=Cyth3 PE=4 SV=1 - [G5EBQ4_MOUSE]                                                                       | 12.54 | 2  | 3 | 4  | 11      | 1.148E7 | 1.551E7 | 8.665E6 | 0.000E0 | 0.000E0 |
| Q61474     | RNA-binding protein Musashi homolog 1 OS=Mus musculus GN=Msi1 PE=1 SV=1 - [MSI1H_MOUSE]                                               | 25.14 | 4  | 7 | 5  | 11      | 5.998E6 | 9.207E6 | 3.583E7 | 0.000E0 | 0.000E0 |
| Q64282     | Interferon-induced protein with tetratricopeptide repeats 1 OS=Mus musculus GN=Ifit1 PE=1 SV=2 - [IFIT1_MOUSE]                        | 15.12 | 4  | 5 | 7  | 11      | 2.152E7 | 1.986E7 | 6.742E6 | 0.000E0 | 0.000E0 |
| Q64339     | Ubiquitin-like protein ISG15 OS=Mus musculus GN=Isig15 PE=1 SV=4 - [ISG15_MOUSE]                                                      | 27.33 | 1  | 4 | 4  | 11      | 1.214E7 | 1.054E7 | 1.666E7 | 0.000E0 | 0.000E0 |
| Q8C156     | Condensin complex subunit 2 OS=Mus musculus GN=Ncapb PE=2 SV=1 - [CND2_MOUSE]                                                         | 10.81 | 1  | 6 | 6  | 11      | 1.498E7 | 1.119E7 | 1.311E7 | 0.000E0 | 0.000E0 |
| Q9DB77     | Cytochrome b-c1 complex subunit 2, mitochondrial OS=Mus musculus GN=Uqcrc2 PE=1 SV=1 - [QCR2_MOUSE]                                   | 14.13 | 1  | 4 | 4  | 11      | 1.705E7 | 1.773E7 | 1.807E7 | 0.000E0 | 0.000E0 |
| G3UXH4     | Serine/threonine-protein kinase N2 OS=Mus musculus GN=Pkn2 PE=4 SV=1 - [G3UXH4_MOUSE]                                                 | 5.35  | 3  | 5 | 5  | 10      | 1.120E7 | 1.119E7 | 1.336E7 | 0.000E0 | 0.000E0 |
| B1AQR8     | Galectin-9 OS=Mus musculus GN=Lgals9 PE=4 SV=1 - [B1AQR8_MOUSE]                                                                       | 12.50 | 3  | 4 | 4  | 10      | 2.348E7 | 4.707E7 | 4.029E7 | 0.000E0 | 0.000E0 |
| G3UZ26     | Serine hydroxymethyltransferase (Fragment) OS=Mus musculus GN=Shmt1 PE=3 SV=1 - [G3UZ26_MOUSE]                                        | 17.08 | 3  | 6 | 6  | 10      | 8.948E6 | 9.997E6 | 1.003E7 | 0.000E0 | 0.000E0 |
| P18155     | Bifunctional methylenetetrahydrofolate dehydrogenase/cyclohydrolase, mitochondrial OS=Mus musculus GN=Mthfd2 PE=1 SV=1 - [MTDC_MOUSE] | 14.86 | 1  | 6 | 6  | 10      | 6.825E6 | 1.730E6 | 6.369E6 | 0.000E0 | 0.000E0 |
| P25206     | DNA replication licensing factor MCM3 OS=Mus musculus GN=Mcm3 PE=1 SV=2 - [MCM3_MOUSE]                                                | 8.00  | 1  | 6 | 6  | 10      | 7.711E6 | 1.201E7 | 9.447E6 | 0.000E0 | 0.000E0 |
| P46061     | Ran GTPase-activating protein 1 OS=Mus musculus GN=Rangap1 PE=1 SV=2 - [RAGP1_MOUSE]                                                  | 13.24 | 1  | 6 | 6  | 10      | 1.855E7 | 4.206E7 | 1.026E7 | 0.000E0 | 0.000E0 |
| Q8C181     | Muscleblind-like protein 2 OS=Mus musculus GN=Mbnl2 PE=2 SV=2 - [MBNL2_MOUSE]                                                         | 11.53 | 2  | 1 | 5  | 10      | 1.821E7 | 1.692E7 | 1.345E7 | 0.000E0 | 0.000E0 |
| Q9CWE0     | Protein FAM54B OS=Mus musculus GN=Fam54b PE=1 SV=1 - [FAM54B_MOUSE]                                                                   | 16.96 | 4  | 4 | 10 | 16.96   | 1.675E7 | 1.143E7 | 2.646E7 | 0.000E0 | 0.000E0 |
| Q9CZY3     | Ubiquitin-conjugating enzyme E2 variant 1 OS=Mus musculus GN=Ube2v1 PE=1 SV=1 - [UBZV1_MOUSE]                                         | 30.61 | 8  | 4 | 4  | 10      | 3.967E7 | 3.426E7 | 4.543E7 | 0.000E0 | 0.000E0 |
| Q9D2R0     | Acetoacetyl-CoA synthetase OS=Mus musculus GN=Aacs PE=1 SV=1 - [AACS_MOUSE]                                                           | 11.46 | 1  | 8 | 8  | 10      | 1.482E7 | 1.295E7 | 8.862E6 | 0.000E0 | 0.000E0 |
| Q9DCC4     | Pyrraline-5-carboxylate reductase 3 OS=Mus musculus GN=Pycrl PE=2 SV=2 - [PSCR3_MOUSE]                                                | 27.74 | 1  | 6 | 6  | 10      | 1.999E7 | 1.481E7 | 1.454E7 | 0.000E0 | 0.000E0 |
| G3X957     | Liprin-beta-2 OS=Mus musculus GN=Pppib2 PE=4 SV=1 - [G3X957_MOUSE]                                                                    | 8.50  | 2  | 4 | 7  | 9       | 6.936E6 | 2.084E7 | 4.712E6 | 0.000E0 | 0.000E0 |
| A2AQD6     | Sperm specific antigen 2 OS=Mus musculus GN=Ssfa2 PE=4 SV=1 - [A2AQD6_MOUSE]                                                          | 4.51  | 3  | 5 | 5  | 9       | 9.725E6 | 1.738E7 | 1.255E7 | 0.000E0 | 0.000E0 |
| E9PWV3     | Ribosomal protein S6 kinase OS=Mus musculus GN=Rps6ka1 PE=3 SV=1 - [E9PWV3_MOUSE]                                                     | 9.32  | 11 | 2 | 6  | 9       | 1.342E7 | 1.607E7 | 2.574E7 | 0.000E0 | 0.000E0 |
| O08915     | AH receptor-interacting protein OS=Mus musculus GN=Aip PE=1 SV=1 - [AIP_MOUSE]                                                        | 18.79 | 2  | 5 | 5  | 9       | 7.924E6 | 2.102E7 | 6.322E6 | 0.000E0 | 0.000E0 |
| O70435     | Proteasome subunit alpha type-3 OS=Mus musculus GN=Pasma3 PE=1 SV=3 - [PSA3_MOUSE]                                                    | 16.86 | 1  | 4 | 9  | 9.111E6 | 9.646E6 | 1.297E7 | 0.000E0 | 0.000E0 |         |
| P0CG14     | Chromosome transmission fidelity protein 8 homolog isoform 2 OS=Mus musculus GN=Chtf8 PE=2 SV=1 - [CTF8_MOUSE]                        | 14.26 | 1  | 5 | 5  | 9       | 1.370E7 | 4.426E7 | 5.402E7 | 0.000E0 | 0.000E0 |
| P63005     | Platelet-activating factor acetylhydrolase IB subunit alpha OS=Mus musculus GN=Pafah1b1 PE=1 SV=2 - [LIS1_MOUSE]                      | 16.34 | 2  | 5 | 5  | 9       | 1.204E7 | 1.345E7 | 9.225E6 | 0.000E0 | 0.000E0 |
| Q55XA5     | TOM1-like protein 2 OS=Mus musculus GN=Tom1l2 PE=2 SV=1 - [Q55XA5_MOUSE]                                                              | 20.35 | 5  | 5 | 5  | 9       | 1.516E7 | 1.171E7 | 1.168E7 | 0.000E0 | 0.000E0 |
| Q80Y83     | Dixin OS=Mus musculus GN=Dixdc1 PE=1 SV=1 - [DIXC1_MOUSE]                                                                             | 9.56  | 1  | 6 | 6  | 9       | 1.054E7 | 1.016E7 | 1.014E7 | 0.000E0 | 0.000E0 |
| Q8R2Q8     | Bone marrow stromal antigen 2 OS=Mus musculus GN=Bst2 PE=1 SV=1 - [BST2_MOUSE]                                                        | 16.28 | 1  | 3 | 3  | 9       | 3.714E7 | 1.087E7 | 5.337E7 | 0.000E0 | 0.000E0 |
| Q91W59     | RNA-binding motif, single-stranded-interacting protein 1 OS=Mus musculus GN=Rbms1 PE=2 SV=1 - [RBMS1_MOUSE]                           | 11.41 | 6  | 4 | 4  | 9       | 1.365E7 | 2.178E7 | 5.953E6 | 0.000E0 | 0.000E0 |
| Q9CQ65     | S-methyl-S'-thioadenosine phosphorylase OS=Mus musculus GN=Mtap PE=2 SV=1 - [MTAP_MOUSE]                                              | 22.61 | 1  | 5 | 5  | 9       | 1.805E7 | 3.186E7 | 2.057E7 | 0.000E0 | 0.000E0 |
| Q9D6R2     | Isocitrate dehydrogenase [NAD] subunit alpha, mitochondrial OS=Mus musculus GN=Idh3a PE=1 SV=1 - [IDH3A_MOUSE]                        | 12.57 | 1  | 5 | 5  | 9       | 1.531E7 | 1.831E7 | 1.713E7 | 0.000E0 | 0.000E0 |
| Q9DBW5     | 26S proteasome non-ATPase regulatory subunit 12 OS=Mus musculus GN=Psmd12 PE=1 SV=4 - [PSD12_MOUSE]                                   | 8.11  | 3  | 4 | 4  | 9       | 7.042E6 | 1.098E7 | 1.066E7 | 0.000E0 | 0.000E0 |
| Q9DBY8     | Nuclear valosin-containing protein-like OS=Mus musculus GN=Nvl PE=1 SV=1 - [NVL_MOUSE]                                                | 7.95  | 1  | 5 | 5  | 9       | 9.427E6 | 3.592E7 | 1.512E7 | 0.000E0 | 0.000E0 |
| Q9Z1W9     | STE20/SFS1-related proline-alanine-rich protein kinase OS=Mus musculus GN=Stk39 PE=1 SV=1 - [STK39_MOUSE]                             | 9.35  | 1  | 5 | 5  | 9       | 1.035E7 | 2.489E7 | 1.704E7 | 0.000E0 | 0.000E0 |
| Q9Z1R2     | 40S ribosomal protein S13 OS=Mus musculus GN=Rps13 PE=2 SV=1 - [Q9Z1R2_MOUSE]                                                         | 22.14 | 2  | 3 | 3  | 9       | 7.445E6 | 1.120E7 | 2.579E7 | 0.000E0 | 0.000E0 |
| A0A0G2JE25 | GTPase NRas (Fragment) OS=Mus musculus GN=Nras PE=1 SV=1 - [A0A0G2JE25_MOUSE]                                                         | 42.67 | 9  | 1 | 4  | 9       | 3.865E7 | 1.060E8 | 9.217E7 | 0.000E0 | 0.000E0 |
| O55029     | Coatamer subunit beta' OS=Mus musculus GN=Copb2 PE=2 SV=2 - [COPB2_MOUSE]                                                             | 8.07  | 1  | 6 | 6  | 8       | 6.056E6 | 2.004E7 | 2.079E7 | 0.000E0 | 0.000E0 |
| B1AT92     | Growth factor receptor bound protein 2 OS=Mus musculus GN=Grb2 PE=4 SV=1 - [B1AT92_MOUSE]                                             | 20.69 | 3  | 4 | 4  | 8       | 3.060E5 | 2.127E5 | 9.147E6 | 0.000E0 | 0.000E0 |
| E9Q0U1     | 26S proteasome non-ATPase regulatory subunit 13 OS=Mus musculus GN=Psmd13 PE=4 SV=1 - [E9Q0U1_MOUSE]                                  | 25.73 | 4  | 5 | 5  | 8       | 7.776E6 | 1.908E7 | 2.619E7 | 0.000E0 | 0.000E0 |
| G3UXL2     | Ribose-phosphate pyrophosphokinase OS=Mus musculus GN=Prpsl13 PE=3 SV=1 - [G3UXL2_MOUSE]                                              | 22.33 | 4  | 4 | 4  | 8       | 1.801E7 | 1.997E7 | 2.442E7 | 0.000E0 | 0.000E0 |
| P01900     | H-2 class I histocompatibility antigen, D-D alpha chain OS=Mus musculus GN=H2-D1 PE=1 SV=1 - [HA12_MOUSE]                             | 18.36 | 19 | 3 | 5  | 8       | 1.761E7 | 2.944E7 | 2.217E7 | 0.000E0 | 0.000E0 |
| P03991     | H-2 class I histocompatibility antigen, K-W28 alpha chain OS=Mus musculus GN=H2-K1 PE=1 SV=2 - [HA1W_MOUSE]                           | 13.32 | 18 | 2 | 4  | 8       | 1.223E7 | 2.411E7 | 3.423E7 | 0.000E0 | 0.000E0 |
| P35288     | Ras-related protein Rab-23 OS=Mus musculus GN=Rab23 PE=1 SV=2 - [RAB23_MOUSE]                                                         | 23.21 | 3  | 5 | 5  | 8       | 2.321E7 | 4.116E7 | 2.222E7 | 0.000E0 | 0.000E0 |
| P35951     | Low-density lipoprotein receptor OS=Mus musculus GN=Ldlr PE=1 SV=2 - [LDLR_MOUSE]                                                     | 2.78  | 1  | 2 | 2  | 8       | 2.021E7 | 2.054E7 | 2.236E7 | 0.000E0 | 0.000E0 |
| Q5NBU8     | XIAP-associated factor 1 OS=Mus musculus GN=Xaf1 PE=2 SV=3 - [XAF1_MOUSE]                                                             | 18.68 | 3  | 4 | 4  | 8       | 8.686E6 | 1.832E7 | 1.247E7 | 0.000E0 | 0.000E0 |
| Q61081     | Hsp90 co-chaperone Cdc37 OS=Mus musculus GN=Cdc37 PE=2 SV=1 - [CDC37_MOUSE]                                                           | 8.44  | 1  | 2 | 2  | 8       | 9.772E6 | 1.832E7 | 7.080E6 | 0.000E0 | 0.000E0 |
| Q7M739     | Nuclear pore complex-associated intranuclear coiled-coil protein TPR OS=Mus musculus GN=Tpr PE=2 SV=1 - [Q7M739_MOUSE]                | 2.46  | 2  | 5 | 5  | 8       | 7.248E6 | 6.270E6 | 7.061E6 | 0.000E0 | 0.000E0 |
| Q99MN1     | Lysine-tRNA ligase OS=Mus musculus GN=Kars PE=1 SV=1 - [SYK_MOUSE]                                                                    | 7.90  | 2  | 4 | 4  | 8       | 1.280E7 | 1.912E7 | 2.032E7 | 0.000E0 | 0.000E0 |
| Q9D1L9     | Regulator complex protein LAMTOR5 OS=Mus musculus GN=Lamtor5 PE=2 SV=1 - [LTOR5_MOUSE]                                                | 59.34 | 2  | 3 | 3  | 8       | 3.199E7 | 3.129E7 | 1.390E7 | 0.000E0 | 0.000E0 |
| Q9Z0W1     | Tumor necrosis factor receptor superfamily member 16 OS=Mus musculus GN=Ngrf PE=1 SV=1 - [TNR16_MOUSE]                                | 13.19 | 2  | 3 | 3  | 8       | 8.068E7 | 1.158E7 | 2.868E7 | 0.000E0 | 0.000E0 |
| A0A0U1RNT6 | S-adenosylmethionine synthase isoform type-2 OS=Mus musculus GN=Mat2a PE=4 SV=1 - [A0A0U1RNT6_MOUSE]                                  | 16.30 | 6  | 5 | 5  | 8       | 6.861E6 | 3.315E6 | 8.656E6 | 0.000E0 | 0.000E0 |
| F7B5B5     | Protein Hnrnp OS=Mus musculus GN=Hnrnp PE=1 SV=1 - [F7B5B5_MOUSE]                                                                     | 10.36 | 3  | 1 | 5  | 8       | 1.591E7 | 2.110E7 | 1.438E7 | 0.000E0 | 0.000E0 |
| P53026     | 60S ribosomal protein L10a OS=Mus musculus GN=Rpl10a PE=1 SV=3 - [RL10A_MOUSE]                                                        | 16.59 | 3  | 4 | 4  | 7       | 2.064E7 | 1.845E7 | 3.347E7 | 0.000E0 | 0.000E0 |
| E9Q9B3     | Protein Stryd3 OS=Mus musculus GN=Stryd3 PE=4 SV=1 - [E9Q9B3_MOUSE]                                                                   | 10.63 | 1  | 4 | 4  | 7       | 1.109E7 | 3.904E6 | 8.292E6 | 0.000E0 | 0.000E0 |
| P59326     | YTH domain family protein 1 OS=Mus musculus GN=Ythd1 PE=2 SV=1 - [YTHD1_MOUSE]                                                        | 5.90  | 2  | 1 | 3  | 7       | 1.218E7 | 8.269E6 | 3.099E7 | 0.000E0 | 0.000E0 |
| Q05DV1     | NADPH-cytochrome P450 reductase OS=Mus musculus GN=Por PE=2 SV=1 - [Q05DV1_MOUSE]                                                     | 4.47  | 4  | 3 | 3  | 7       | 1.103E7 | 1.095E7 | 1.189E7 | 0.000E0 | 0.000E0 |
| Q71FD5     | E3 ubiquitin-protein ligase ZNRF2 OS=Mus musculus GN=Znrf2 PE=1 SV=1 - [ZNRF2_MOUSE]                                                  | 15.13 | 2  | 3 | 3  | 7       | 1.253E7 | 1.096E7 | 1.566E7 | 0.000E0 | 0.000E0 |
| Q8C6B2     | Rhotekin OS=Mus musculus GN=Rtkn PE=1 SV=3 - [RTKN_MOUSE]                                                                             | 10.82 | 4  | 5 | 5  | 7       | 4.250E6 | 3.599E6 | 2.491E6 | 0.000E0 | 0.000E0 |
| Q8R0J7     | Vacuolar protein sorting-associated protein 37B OS=Mus musculus GN=Vps37b PE=2 SV=1 - [VP37B_MOUSE]                                   | 12.63 | 1  | 3 | 3  | 7       | 1.063E7 | 1.943E7 | 1.779E7 | 0.000E0 | 0.000E0 |
| Q9Z1J2     | GTP-binding protein Rheb OS=Mus musculus GN=Rheb PE=1 SV=1 - [RHEB_MOUSE]                                                             | 17.93 | 4  | 4 | 4  | 7       | 7.811E6 | 1.286E7 | 1.670E7 | 0.000E0 | 0.000E0 |
| Q9DBR0     | A-kinase anchor protein 8 OS=Mus musculus GN=Akap8 PE=1 SV=1 - [AKAP8_MOUSE]                                                          | 4.80  | 1  | 2 | 2  | 7       | 1.202E7 | 1.559E7 | 1.721E7 | 0.000E0 | 0.000E0 |
| Q9QZM0     | Ubiquitin-2 OS=Mus musculus GN=Ubqln2 PE=1 SV=2 - [UBQL2_MOUSE]                                                                       | 4.70  | 1  | 4 | 4  | 7       | 7.894E6 | 1.156E7 | 1.711E7 | 0.000E0 | 0.000E0 |
| Q9R1T4     | Septin-6 OS=Mus musculus GN=Sept6 PE=1 SV=4 - [SEPT6_MOUSE]                                                                           | 10.37 | 2  | 1 | 4  | 7       | 1.468E7 | 1.154E7 | 9.528E6 | 0.000E0 | 0.000E0 |
| A0A0G2JGN4 | Small nuclear ribonucleoprotein-associated protein B OS=Mus musculus GN=Snrpb PE=4 SV=1 - [A0A0G2JGN4_MOUSE]                          | 40.00 | 3  | 3 | 3  | 7       | 1.590E7 | 1.980E7 | 2.460E7 | 0.000E0 | 0.000E0 |
| E9Q9H2     | DnaJ homolog subfamily C member 2 OS=Mus musculus GN=Dnajc2 PE=4 SV=1 - [E9Q9H2_MOUSE]                                                | 10.60 | 3  | 4 | 4  | 6       | 3.482E6 | 2.566E6 | 6.147E6 | 0.000E0 | 0.000E0 |

|            |                                                                                                                               |       |   |   |   |   |         |         |         |         |         |         |
|------------|-------------------------------------------------------------------------------------------------------------------------------|-------|---|---|---|---|---------|---------|---------|---------|---------|---------|
| P35278     | Ras-related protein Rab-5C OS=Mus musculus GN=Rab5c PE=1 SV=2 - [RAB5C_MOUSE]                                                 | 18.06 | 5 | 2 | 3 | 6 | 2.393E7 | 3.768E7 | 1.613E7 | 0.000E0 | 0.000E0 |         |
| P39429     | TNF receptor-associated factor 2 OS=Mus musculus GN=Traf2 PE=1 SV=1 - [TRAF2_MOUSE]                                           | 8.58  | 1 |   | 3 | 3 | 6       | 1.076E7 | 6.206E6 | 8.443E6 | 0.000E0 | 0.000E0 |
| P67984     | 60S ribosomal protein L22 OS=Mus musculus GN=Rpl22 PE=2 SV=2 - [RL22_MOUSE]                                                   | 18.75 | 1 | 2 |   | 2 | 6       | 3.072E7 | 2.967E7 | 7.421E7 | 0.000E0 | 0.000E0 |
| Q3V2R3     | Beta-chimaerin OS=Mus musculus GN=Chn2 PE=2 SV=1 - [Q3V2R3_MOUSE]                                                             | 14.74 | 7 |   | 5 | 5 | 6       | 8.236E6 | 1.592E7 | 3.620E6 | 0.000E0 | 0.000E0 |
| Q5RL57     | A kinase (PRKA) anchor protein 8-like OS=Mus musculus GN=Akap8l PE=2 SV=1 - [Q5RL57_MOUSE]                                    | 5.15  | 2 |   | 3 | 3 | 6       | 1.392E7 | 6.894E6 | 1.507E7 | 0.000E0 | 0.000E0 |
| Q9CPW4     | Actin-related protein 2/3 complex subunit 5 OS=Mus musculus GN=Arpc5 PE=2 SV=3 - [ARPCS_MOUSE]                                | 28.48 | 3 |   | 4 | 4 | 6       | 3.192E7 | 9.431E6 | 3.437E7 | 0.000E0 | 0.000E0 |
| Q9CR68     | Cytochrome b-c1 complex subunit Rieske, mitochondrial OS=Mus musculus GN=Uqcrcf1 PE=1 SV=1 - [UCRI_MOUSE]                     | 6.20  | 1 |   | 3 | 3 | 6       | 1.540E7 | 2.493E7 | 2.278E7 | 0.000E0 | 0.000E0 |
| Q9JXK6     | ADP-sugar pyrophosphatase OS=Mus musculus GN=Nudt5 PE=1 SV=1 - [NUDT5_MOUSE]                                                  | 18.35 | 3 |   | 3 | 3 | 6       | 3.157E7 | 6.928E6 | 1.793E7 | 0.000E0 | 0.000E0 |
| Q9QYH6     | Melanoma-associated antigen D1 OS=Mus musculus GN=Maged1 PE=1 SV=1 - [MAGD1_MOUSE]                                            | 3.61  | 1 |   | 2 | 2 | 6       | 6.300E6 | 9.148E6 | 1.343E7 | 0.000E0 | 0.000E0 |
| A0A0A6YW28 | Ubiquitin carboxyl-terminal hydrolase 4 OS=Mus musculus GN=Usp4 PE=1 SV=1 - [A0A0A6YW28_MOUSE]                                | 5.25  | 5 |   | 3 | 4 | 6       | 1.049E7 | 9.788E6 | 6.495E6 | 0.000E0 | 0.000E0 |
| Q3TX55     | Actin-related protein 2/3 complex subunit 4 OS=Mus musculus GN=Arpc4 PE=1 SV=1 - [Q3TX55_MOUSE]                               | 20.51 | 3 |   | 2 | 2 | 5       | 3.412E6 | 8.687E6 | 1.753E7 | 0.000E0 | 0.000E0 |
| Q9WVA3     | Mitotic checkpoint protein BUB3 OS=Mus musculus GN=Bub3 PE=2 SV=2 - [BUB3_MOUSE]                                              | 11.35 | 1 |   | 3 | 3 | 5       | 1.480E7 | 1.999E7 | 2.387E7 | 0.000E0 | 0.000E0 |
| P31750     | RAC-alpha serine/threonine-protein kinase OS=Mus musculus GN=Akt1 PE=1 SV=2 - [AKT1_MOUSE]                                    | 9.58  | 3 |   | 1 | 3 | 5       | 1.540E7 | 9.435E6 | 6.602E6 | 0.000E0 | 0.000E0 |
| Q61R34     | G-protein-signaling modulator 1 OS=Mus musculus GN=Gpsm1 PE=1 SV=3 - [GPSM1_MOUSE]                                            | 9.36  | 3 |   | 4 | 4 | 5       | 1.250E7 | 1.996E7 | 4.128E6 | 0.000E0 | 0.000E0 |
| Q8BH57     | WD repeat-containing protein 48 OS=Mus musculus GN=Wdr48 PE=1 SV=1 - [WDR48_MOUSE]                                            | 4.14  | 1 |   | 2 | 2 | 5       | 9.707E6 | 8.787E6 | 1.096E7 | 0.000E0 | 0.000E0 |
| Q8BIA4     | F-box/WD repeat-containing protein 8 OS=Mus musculus GN=Fbxw8 PE=1 SV=2 - [FBXW8_MOUSE]                                       | 3.85  | 1 |   | 2 | 2 | 5       | 1.848E7 | 1.923E7 | 2.148E7 | 0.000E0 | 0.000E0 |
| Q8VCP8     | Adenylate kinase isoenzyme 6 OS=Mus musculus GN=Taf9 PE=2 SV=1 - [KAD6_MOUSE]                                                 | 9.88  | 2 |   | 2 | 2 | 5       | 1.128E7 | 1.386E7 | 7.157E6 | 0.000E0 | 0.000E0 |
| Q91VK1     | Basic leucine zipper and W2 domain-containing protein 2 OS=Mus musculus GN=Bzw2 PE=1 SV=1 - [BZW2_MOUSE]                      | 4.06  | 1 |   | 1 | 2 | 5       | 8.976E6 | 1.476E7 | 9.994E6 | 0.000E0 | 0.000E0 |
| Q9CY50     | Translocon-associated protein subunit alpha OS=Mus musculus GN=Ssr1 PE=1 SV=1 - [SSRA_MOUSE]                                  | 6.64  | 1 |   | 2 | 2 | 5       | 2.298E7 | 1.711E7 | 2.758E7 | 0.000E0 | 0.000E0 |
| Q9CZG9     | PDZ domain-containing protein 11 OS=Mus musculus GN=Pdzd11 PE=1 SV=1 - [PDZ11_MOUSE]                                          | 27.14 | 1 |   | 3 | 3 | 5       | 1.489E7 | 2.752E7 | 1.850E7 | 0.000E0 | 0.000E0 |
| Q9D1M0     | Protein SEC13 homolog OS=Mus musculus GN=Sec13 PE=2 SV=3 - [SEC13_MOUSE]                                                      | 11.49 | 1 |   | 3 | 3 | 5       | 1.080E7 | 1.144E7 | 2.123E7 | 0.000E0 | 0.000E0 |
| Q9J1I6     | sorting                                                                                                                       | 10.15 | 3 |   | 3 | 3 | 5       | 2.145E7 | 1.215E7 | 3.585E7 | 0.000E0 | 0.000E0 |
| P61963     | DBP1- and CUL4-associated factor 7 OS=Mus musculus GN=Dcaf7 PE=2 SV=1 - [DCAF7_MOUSE]                                         | 9.36  | 1 |   | 3 | 3 | 4       | 9.122E6 | 1.191E7 | 1.377E7 | 0.000E0 | 0.000E0 |
| Q80X95     | Ras-related GTP-binding protein A OS=Mus musculus GN=Rraga PE=2 SV=1 - [RRAGA_MOUSE]                                          | 6.71  | 3 |   | 2 | 2 | 4       | 8.054E6 | 1.400E7 | 8.461E6 | 0.000E0 | 0.000E0 |
| P97376     | Protein FRG1 OS=Mus musculus GN=Frq1 PE=1 SV=2 - [FRG1_MOUSE]                                                                 | 7.75  | 1 |   | 2 | 2 | 4       | 6.897E6 | 5.684E6 | 6.422E6 | 0.000E0 | 0.000E0 |
| D6RE33     | Enhancer of mRNA-decapping protein 4 OS=Mus musculus GN=Edc4 PE=4 SV=1 - [D6RE33_MOUSE]                                       | 1.21  | 4 |   | 1 | 1 | 4       | 3.821E6 | 6.483E6 | 1.253E7 | 0.000E0 | 0.000E0 |
| F6ZL69     | Nischarin (Fragment) OS=Mus musculus GN=Nisch PE=4 SV=1 - [F6ZL69_MOUSE]                                                      | 21.48 | 3 |   | 2 | 2 | 4       | 3.352E6 | 4.489E6 | 6.124E6 | 0.000E0 | 0.000E0 |
| Q8C373     | Cancer-related nucleoside-triphosphatase homolog OS=Mus musculus GN=Ntprc PE=2 SV=1 - [Q8C373_MOUSE]                          | 10.74 | 3 |   | 1 | 1 | 4       | 5.429E6 | 1.678E7 | 1.373E7 | 0.000E0 | 0.000E0 |
| Q9CY97     | RNA polymerase II subunit A C-terminal domain phosphatase SSU72 OS=Mus musculus GN=Ssu72 PE=2 SV=1 - [SSU72_MOUSE]            | 11.86 | 1 |   | 2 | 2 | 4       | 9.148E6 | 7.269E6 | 8.399E6 | 0.000E0 | 0.000E0 |
| Q9QX11     | Cytohesin-1 OS=Mus musculus GN=Cyth1 PE=2 SV=2 - [CYH1_MOUSE]                                                                 | 5.78  | 3 |   | 2 | 2 | 4       | 1.536E7 | 2.090E7 | 1.406E7 | 0.000E0 | 0.000E0 |
| E9Q5H2     | Acidic leucine-rich nuclear phosphoprotein 32 family member E (Fragment) OS=Mus musculus GN=Anp32e PE=4 SV=1 - [E9Q5H2_MOUSE] | 11.21 | 3 |   | 1 | 1 | 3       | 2.306E7 | 2.062E7 | 2.724E7 | 0.000E0 | 0.000E0 |
| P56382     | ATP synthase subunit epsilon, mitochondrial OS=Mus musculus GN=Atp5e PE=2 SV=2 - [ATP5E_MOUSE]                                | 13.46 | 1 |   | 1 | 1 | 3       | 2.333E7 | 2.178E7 | 2.684E7 | 0.000E0 | 0.000E0 |
| Q8C7U1     | NEDD4-binding protein 3 OS=Mus musculus GN=N4bp3 PE=2 SV=1 - [N4BP3_MOUSE]                                                    | 2.23  | 1 |   | 1 | 1 | 3       | 7.021E6 | 7.536E6 | 1.029E7 | 0.000E0 | 0.000E0 |
| Q99MX0     | Transketolase-like protein 1 OS=Mus musculus GN=Tktl1 PE=2 SV=2 - [TKTL1_MOUSE]                                               | 1.68  | 1 |   | 1 | 1 | 3       | 1.443E8 | 1.451E8 | 2.334E8 | 0.000E0 | 0.000E0 |

\_\_\_\_\_
